# Supplementary material for: Expression and prognostic analyses of the insulin-like growth factor 2 mRNA binding protein family in human pancreatic cancer
Source: Springer Nature journal article supplement (doi:10.1186/s12885-020-07590-x), 2020-11-27
Supplement: MOESM1 [file 18634948]

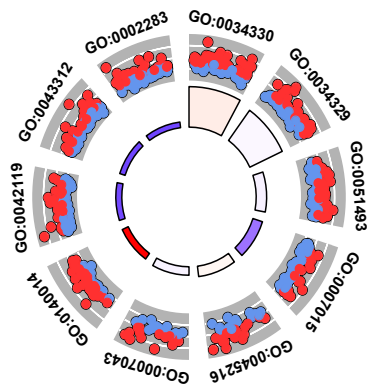

| ID         | Description                                       |
|------------|---------------------------------------------------|
| GO:0034330 | cell junction organization                        |
| GO:0034329 | cell junction assembly                            |
| GO:0051493 | regulation of cytoskeleton organization           |
| GO:0007015 | actin filament organization                       |
| GO:0045216 | cell-cell junction organization                   |
| GO:0007043 | cell-cell junction assembly                       |
| GO:0140014 | mitotic nuclear division                          |
| GO:0042119 | neutrophil activation                             |
| GO:0043312 | neutrophil degranulation                          |
| GO:0002283 | neutrophil activation involved in immune response |

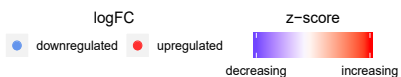

## IGF2BP2

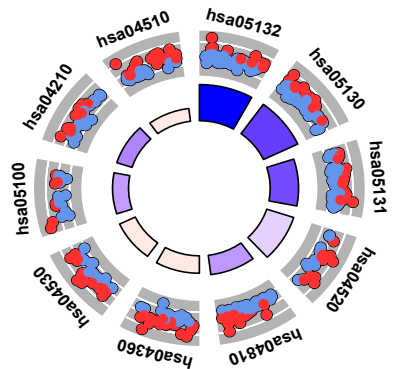

| ID       | Description                            |
|----------|----------------------------------------|
| hsa05132 | Salmonella infection                   |
| hsa05130 | Pathogenic Escherichia coli infection  |
| hsa05131 | Shigellosis                            |
| hsa04520 | Adherens junction                      |
| hsa04810 | Regulation of actin cytoskeleton       |
| hsa04360 | Axon guidance                          |
| hsa04530 | Tight junction                         |
| hsa05100 | Bacterial invasion of epithelial cells |
| hsa04210 | Apoptosis                              |
| hsa04510 | Focal adhesion                         |

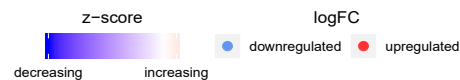

## IGF2BP2

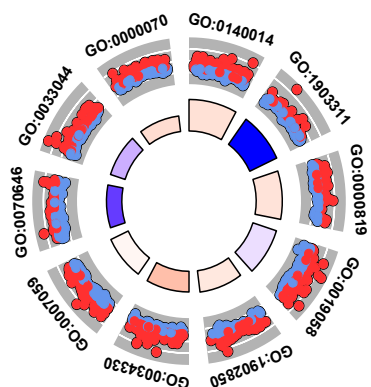

| ID         | Description                                               |
|------------|-----------------------------------------------------------|
| GO:0140014 | mitotic nuclear division                                  |
| GO:1903311 | regulation of mRNA metabolic process                      |
| GO:0000819 | sister chromatid segregation                              |
| GO:0019058 | viral life cycle                                          |
| GO:1902850 | microtubule cytoskeleton organization involved in mitosis |
| GO:0034330 | cell junction organization                                |
| GO:0007059 | chromosome segregation                                    |
| GO:0070646 | protein modification by small protein removal             |
| GO:0033044 | regulation of chromosome organization                     |
| GO:0000070 | mitotic sister chromatid segregation                      |

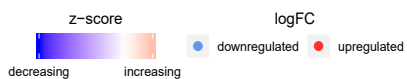

## IGF2BP3

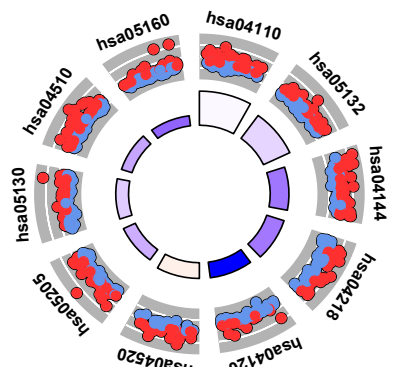

| ID       | Description                           |
|----------|---------------------------------------|
| hsa04110 | Cell cycle                            |
| hsa05132 | Salmonella infection                  |
| hsa04144 | Endocytosis                           |
| hsa04218 | Cellular senescence                   |
| hsa04120 | Ubiquitin mediated proteolysis        |
| hsa04520 | Adherens junction                     |
| hsa05205 | Proteoglycans in cancer               |
| hsa05130 | Pathogenic Escherichia coli infection |
| hsa04510 | Focal adhesion                        |
| hsa05160 | Hepatitis C                           |

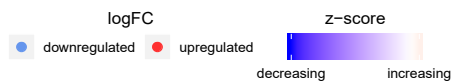

## IGF2BP3

Table S1: Primers and SiRNA sequences used in this research (5'-3')

| Name            | Sequence                        |
|-----------------|---------------------------------|
| IGF2BP2 forward | 5'-TGGCTTGGTTGGAAGACTGATTGG-3'  |
| IGF2BP2 reverse | 5'-GCCTGGGTTGGGATGAAGAGATTC-3'  |
| IGF2BP3 forward | 5'-GCTCTATCAGTCGGTGCCATCATC-3'  |
| IGF2BP3 reverse | 5'-CTGGTCACGAGGGACAACAACCTTC-3' |
| GAPDH forward   | 5'-AAGGTGAAGGTCGGAGTCAAC-3'     |
| GAPDH reverse   | 5'-GGGGTCATTGATGGCAACAATA-3'    |
| IGF2BP2 SiRNA   | TCGGGTAAAGTGGAATTGCATGG         |
| IGF2BP3 SiRNA   | AAGAGACAAAAAGTAGTTTTTTC         |

| Gene    | Related Genes                                                                                                                                                                                                                                                                                                                                                                                                                                    | Correlation |
|---------|--------------------------------------------------------------------------------------------------------------------------------------------------------------------------------------------------------------------------------------------------------------------------------------------------------------------------------------------------------------------------------------------------------------------------------------------------|-------------|
| IGF2BP2 | E2F8<br>KITLG<br>MREG<br>WNT7B<br>ARPC5<br>AK4P1<br>PADI1<br>SLC22A18AS<br>RELB<br>RAD51AP1<br>CLDN12<br>MAIP1<br>GPR157<br>CAMK2N1<br>UBQLN4<br>NTN4<br>TSPAN5<br>VPS9D1-AS1<br>ARAP3<br>HNRNPL<br>PPP1R18<br>BMP4<br>ACTN1<br>EIF3I<br>ANKRD10-IT1<br>LHB<br>RND3<br>TNIK<br>TMEM144<br>AC007283.2<br>LGALS4<br>TNIP2<br>ARHGAP11A<br>ZNF341-AS1<br>NFATC2IP<br>AMMECR1L<br>NFE2L2<br>FAM111A<br>BCL3<br>PYCARD<br>GCKR<br>AC026470.2<br>VGLL4 | Positive    |

---

AGFG1  
AC130456.3  
MAPK15  
ARHGEF2  
CENPU  
NSUN5  
C11orf86  
SERPINB1  
AL161431.1  
CARD19  
ANXA4  
CD109  
GYS1  
PPM1J  
DNM2  
HMGA1P1  
CHEK1  
WFDC2  
ACBD3-AS1  
HIST1H2AC  
FBXO28  
SUMF1  
XKR9  
SUN1  
YEATS2  
TNNI2  
COP1  
CLNS1A  
FTSJ1  
CD82  
FBXL19  
FAM89B  
IL20RB  
OIP5  
RASSF7  
PPIAP2  
LINC00705  
CHML  
CD47  
TRIB1  
PSMB10  
CEACAM5  
AC022165.1  
PPP1R11

---

---

IRAK1  
PRPS2  
OSBPL10  
PROM1  
PRDM8  
C15orf48  
OGFOD1  
TFCP2L1  
MAP3K5  
MMP11  
VGLL1  
METTL7B  
NOL4L  
OPTN  
FBP1  
MUC16  
CLMN  
SMOX  
UBE2I  
LPAR2  
RPN1  
RIPK4  
SNORD89  
PLK3  
MYO19  
ITPRID2  
PFKP  
SLC16A4  
UBE2V1  
DESI2  
HSPD1  
HIST2H2BF  
PSMD13  
FBXO34  
LRG1  
CHRAC1  
CSNK2A2  
RNA5SP18  
PPIA  
C8orf31  
PTBP1  
SHISA5  
AC021078.1  
SNORD12B

---

---

TM9SF3  
TOP1  
GTF2E2  
B4GALT1  
EXPH5  
AC132008.2  
MIR559  
TMEM183A  
TRIM31-AS1  
PSCA  
EIF1AD  
GALNT7  
PSORS1C1  
OAS3  
DHRS9  
MYO5B  
PVT1  
NCBP2  
FRMD4B  
SATB2-AS1  
ENC1  
LMNB1  
TGFB2  
AC008687.2  
BCL2L14  
PLEKHA8P1  
GJB5  
SEPT10  
ADORA2B  
RAB5A  
RPL37P1  
LINC02257  
BARD1  
ILDR1  
AC025154.2  
OXR1  
TIMM23  
NUMB  
RAB5IF  
ARL5B  
HNMT  
MAP3K6  
TGIF2  
DDX27

---

---

IFITM10  
ZNRF1  
AC092611.2  
SPTBN2  
DUSP10  
PANX1  
LINC01572  
SKIL  
PACS1  
RAD18  
SLC44A4  
C11orf91  
TONSL  
ZFYVE21  
TNFRSF14-AS1  
DIRC2  
CDC42EP1  
AC254633.1  
RALBP1  
OSBPL5  
AP006621.4  
GNAI3  
OCIAD2  
MCM2  
AC025580.2  
TRAK1  
CTSV  
VSIG10  
EZH2  
AFMID  
AP000974.1  
LIMA1  
LDHAP5  
CYTH2  
C15orf62  
MMADHC  
UTP4  
SAPCD2  
AC012645.4  
PNP  
PLAG1  
PACSIN3  
NEK7  
CENPK

---

---

RPS6KA1  
MARCKSL1  
SCEL  
PALB2  
ARRDC1  
PPP1R3B  
SIX4  
KBTBD2  
ELF4  
TMPRSS3  
STK38L  
SUMO1  
AL512274.1  
PPRC1  
ATL3  
STAP2  
ATXN2L  
DIAPH2-AS1  
SLC22A3  
FAM114A1  
IFITM3  
STK26  
GABRE  
CCNB1  
AC022211.1  
ADAM15  
HPS3  
TCIRG1  
PLEKHM1P1  
EIF2S3  
PELI1  
UBE2E1  
SUMO3  
AC245041.1  
BHLHE41  
AC023043.1  
ORC6  
CRNDE  
ZNF1  
LIN9  
COLGALT1  
AC005034.3  
TTC31  
MRGBP

---



---

CYB5R2  
ADAM28  
PPFIBP1  
TMEM179B  
CLDN16  
RAB11FIP5  
PPARD  
KLK6  
PLEKHA5  
RNF207  
IL10RB  
THAP9-AS1  
KDEL3  
TRIM54  
FAM110A  
IKZF2  
SIM2  
IARS2  
PTPRF  
ARHGAP12  
ACTRT3  
GDPD3  
PPIC  
LMNB2  
AP000695.2  
PI3  
RER1  
KIF13B  
LRFN4  
ZNF488  
PAFAH1B2  
AL365181.3  
PSMA1  
SNAP23  
TMEM30B  
DDIT4  
CST6  
CYP4A22-AS1  
SHCBP1  
MUC5AC  
EFNA1  
OPN3  
SUMO4  
FAM214B

---

---

PRRG1  
PARP3  
AC078923.1  
ADAM10  
SLC52A2  
MRPS10  
FXYD5  
PTPN14  
SULT2B1  
TSTA3  
PTP4A2  
NRAS  
SPAG5  
LINC00482  
STX4  
GPSM2  
CASC8  
PARP12  
PICART1  
FUT2  
TMEM185B  
TMEM241  
ANXA8L1  
BPNT1  
NEAT1  
DPY30  
GDE1  
TGFB1  
AP003555.3  
GPD2  
FOXD1  
LRRFIP1  
RNU2-27P  
NAT10  
B3GNT2  
AL606489.1  
LIMK1  
AL021578.1  
MAPK3  
TCN1  
LINC01137  
ARHGEF16  
EXO1  
AC022819.1

---

---

PSME4  
ZFYVE19  
TAP1  
OCLN  
KRT18P11  
AL591806.1  
ARHGAP26  
SYNGR2  
MRPL19  
MAFF  
HSPA1A  
KISS1  
DIAPH3  
AC009133.1  
ANXA8  
BZW1  
SPRED2  
BROX  
AC009065.5  
YWHAZP6  
HSPB1  
VPS35  
NAALADL2  
GPATCH2  
BATF  
CTTNBP2NL  
FAT1  
TMCC1  
TNFSF10  
RNU6ATAC18P  
AC009065.2  
SLC6A20  
DLG5  
CEACAM6  
SLC35C1  
TNFAIP2  
LPAR5  
CEP70  
DDX18  
ARNTL2-AS1  
UBALD2  
SYPL1  
AC093673.1  
PRDX1

---

---

TRIM31  
PCGF1  
AC068580.2  
MRPL3  
MIR135B  
DEPDC1B  
TBC1D2  
DTX3L  
SMC4  
HAS3  
SLFN13  
PKP4  
FAM3C2  
ITGB8  
SPTY2D1  
KIF15  
DUTP1  
ERN2  
XRCC5  
DPP9  
DERA  
DLG1  
CYP2S1  
MCM4  
CDC6  
MMEL1  
CDC42SE1  
CDA  
GALNT10  
SOWAHC  
HOXB9  
TM4SF1-AS1  
GAPDH  
RF00405  
TOB1  
TRAF7  
CRYBG1  
TMTC2  
ADM  
PRIM2  
TANC1  
PPM1G  
FAM83A  
KNOP1

---

---

FLNB-AS1  
PARP14  
AC093732.1  
NFYA  
AC022211.3  
ARPC1A  
LINC02014  
BX470102.1  
DPY19L1  
DYNC1I2  
RRAS2  
FAM110C  
DGKA  
AL121772.3  
CORO1C  
FRMD5  
NUP93  
ADIPOR1  
AC245041.2  
TICRR  
PSMD10P2  
SERPINH1  
PLXNA1  
MFSD10  
HOXB6  
EIF4E2  
VDAC1  
BCL6  
PDLIM7  
EPS8L3  
TMEM50A  
GTPBP2  
FBLIM1  
CTSE  
P4HA1  
PSMB8  
SRD5A3  
WDR26  
STEAP3  
RARRES3  
JOSD1  
ANO6  
ABLIM3  
SLC35A2

---

---

MYORG  
ARL4C  
CENPE  
ST3GAL1  
SYTL2  
PXN  
TNFRSF1A  
PRELID3B  
AC073283.1  
FUT6  
CDCA2  
MIR210HG  
GART  
ZC3H15  
LINC02188  
PPP3R1  
CCDC9B  
DNTTIP1  
GALM  
AGTRAP  
FOSL2  
EPHX4  
AC106886.2  
IPO7  
SPTBN1  
PRELID2  
PLSCR1  
ENDOD1  
SLC22A20P  
C1RL  
SQOR  
BCKDK  
SNX7  
KDM2A  
INCENP  
RNASEH1  
PCLAF  
C1orf198  
ACTB  
EML4  
LITAF  
TRIM21  
RIT1  
ABI1

---

---

DUSP11  
AC008687.3  
LDHAP3  
ATP2C1  
MTMR11  
SGO1  
NCAPG  
AC005753.1  
RN7SL130P  
MISP  
SLC35B2  
AC010542.5  
PLP2  
DNAJC13  
EPHA1  
BDH2  
POF1B  
HOXB-AS4  
HSBP1L1  
CCDC58  
AP001453.2  
GCC2-AS1  
EHD1  
C1orf112  
AC009237.15  
PDCD6IP  
RFC4  
CDK2AP2  
AL590666.2  
DEDD  
PTTG1  
PTPRK  
SSRP1  
CCDC120  
AC138150.2  
HOXA-AS2  
RNU6-26P  
AC120498.4  
LINC01186  
TNNT1  
AC105020.1  
ATP2C2-AS1  
HOXB7  
IER3

---

---

DSC2  
AP001033.2  
SP140L  
AC023043.4  
AC133528.1  
HEBP2  
SPC24  
CYBA  
ARL14  
AC068946.1  
AC008687.4  
MYO1C  
MIR4435-2HG  
ATIC  
AC015660.1  
ANO9  
JAG1  
KNL1  
TTK  
LGALS9  
SFTA2  
SLC44A1  
CNKSR1  
PPP1R15A  
MFSD9  
OSER1  
TUBB  
CPOX  
SLC8B1  
ZYX  
AL590652.1  
PICALM  
SGMS2  
MXD1  
SAMD9  
EFHD2  
LIMS1  
BLZF1  
TSG101  
PGK1  
PTPRH  
AC005041.3  
ATL2  
BCAR3

---



---

BACH1  
EHBP1L1  
MTHFD1  
LINC00887  
SH3TC2  
USP43  
ID1  
CAP1  
CYFIP1  
FAM111B  
MBOAT2  
IL32  
VWA2  
LRRC59  
WDR75  
UBE2T  
DNAJB1  
C10orf55  
YOD1  
RHOV  
EIF2A  
AL138689.1  
CTDSPL  
MPZL1  
RNPEPL1  
AC108058.1  
KRT8P12  
CLIC3  
GLRX2  
RUNX1  
TRADD  
MCU  
SYT8  
ZW10  
AFAP1L2  
CENPN  
ETHE1  
ARF6  
ZDHHC16  
CCDC6  
POLB  
FADD  
AL606834.1  
KRT18P28

---

---

ZDHHC6  
DOK4  
SLC17A9  
RALY  
AMMECR1  
TWF2  
C6orf141  
YES1  
CAPRIN1  
SEC14L2  
AP003555.2  
CCND1  
LPCAT4  
AC108134.1  
TMEM54  
CDCA4  
FRRS1  
AUP1  
PIMREG  
CORO1B  
LINC02081  
MICALL2  
CAPN8  
BUB1B  
PPP4C  
ZBTB7A  
AP003068.2  
PRR13  
PSMD7  
ESPN  
PTPRU  
CGB7  
PTPRE  
EHF  
EFNA5  
PPP4R1L  
LTBR  
HLA-V  
HOXB5  
GTF2IRD1  
CDK7  
KRT87P  
CDC42EP5  
CAPN12

---

---

AGR2  
RIPK3  
SLC50A1  
METRNL  
PARD3  
VDR  
ERGIC1  
MMP7  
SF3B4  
NTF4  
CASP6  
B4GALT4  
GIPC1  
CGAS  
TBX6  
TMEM87A  
BIK  
NMU  
STIP1  
NCK1  
AGPS  
GRHL1  
MLPH  
CLDN23  
BACE2  
UBA6  
ANXA1  
AL365356.5  
AC112220.2  
CDH1  
IFI27  
CENPI  
AL158166.1  
AL035661.1  
POLQ  
LINC02298  
CYP27C1  
ESRRA  
RAD51  
PRPF40A  
SMCO2  
DTL  
COX6B2  
TRIM15

---

---

IFNGR2  
KRT16  
DCBLD2  
AC073410.1  
TXN  
AL445933.1  
SYT12  
SYTL4  
ANKRD36C  
PKM  
TMEM63B  
LASP1  
RAB10  
PAK2  
ABHD4  
CREB3L1  
GCNT3  
PHLDA3  
TMEM173  
LRRC8E  
LRP10  
GPR35  
MMP28  
KNTC1  
RHBDF2  
PGM2  
ABHD11  
AURKB  
ENO1  
TRPV4  
TFF2  
HMMR  
RACGAP1  
KIF4A  
STK3  
STK38  
ELF3-AS1  
CAPZA1  
AC103702.2  
ARL6IP6  
CARD11  
NCAPH  
RTKN  
PAWR

---

---

FOXM1  
TNIP1  
CTDSP1  
KLK10  
OAS1  
SPDEF  
MAL2-AS1  
ARAP2  
BIRC5  
CCDC68  
GAN  
NCEH1  
HDAC7  
NUTF2  
KRAS  
NUF2  
IQGAP1  
VPS37C  
S100A2  
AURKA  
FAM83E  
VCL  
ANTXR2  
ADAP1  
TALDO1  
MOB1A  
STPG4  
AVPI1  
AMIGO2  
RAB6A  
SLC44A2  
AFAP1  
RTP4  
SKA3  
SH3D21  
CRABP2  
POC1A  
VSIG2  
VTI1A  
CHMP1A  
RBMS2  
MGST1  
FAM222B  
PYGB

---

---

TTC9C  
TROAP  
RAP2B  
S100A13  
OSMR  
AC068580.1  
SH3BP2  
ARHGEF19  
HS3ST1  
AK4  
AC092964.1  
AC092611.3  
SLC22A18  
SAT1  
FAM136A  
TMEM43  
TMEM63A  
NIP7  
BHLHE40  
LONRF3  
CACUL1  
CATSPER1  
HERC4  
FAM3C  
PATJ  
TMEM51  
BAZ1A  
SLC2A10  
PDLIM1  
ACY1  
BCL9L  
SFT2D1  
KCNK6  
USP4  
CD9  
KLF6  
F3  
ZFP36L1  
PML  
SLC23A3  
STK24  
TKT  
ALG3  
CEBPB

---

---

IQANK1  
TSPAN14  
REST  
PKMYT1  
ADGRF4  
MANCR  
RBBP8  
YWHAZP5  
CSTF2  
CD58  
SLC25A43  
IL4R  
PTBP3  
GPN1  
LINC00511  
MYBL2  
PHLDA1  
KIF18B  
SLC25A24  
ESPL1  
KRT80  
AREG  
MRPS6  
NAPRT  
ZPR1  
TAX1BP3  
RNF223  
AL137782.1  
CASP10  
BEAN1-AS1  
CSTB  
LYPLA2  
LINC02595  
AC004923.4  
OPLAH  
PLS1  
SLC16A1  
BRI3  
PRRG4  
AC027031.2  
HPCAL1  
CACNB3  
REXO2  
RMI2

---

---

EIF3M  
JPT2  
ARPC2  
HELLS  
RAB38  
AC007336.1  
ARHGAP21  
AL157838.1  
RPE  
ATP1B3  
SLC35A3  
AC106900.2  
SLC39A4  
ELMO3  
FXVD3  
MSL3P1  
AC093162.2  
GNG5  
CMTM6  
NAA50  
IGF2BP2-AS1  
FOSL1  
SLC10A3  
ATP11B  
ZDHHC20  
OASL  
CIB1  
CDCA8  
RAD54L  
CCNA2  
CAB39  
SH3PXD2A-AS1  
ACTR3  
TUFT1  
RHBDL2  
LINC01232  
MARK2  
CENPA  
RALA  
UNC93B1  
PLAU  
PLS3  
AHNAK  
CAPN5

---



---

ARPC1B  
IRS1  
KPNA7  
TMC6  
DNMBP-AS1  
RNPEP  
SLPI  
CHMP4B  
C1orf116  
NAB1  
RCC1  
PERM1  
PPP1CA  
HCAR1  
STIL  
RAB27B  
TMEM41B  
IL1RN  
DUSP6  
ARHGEF5  
PRXL2B  
FANCA  
PGM2L1  
RNF168  
ZC3H12A  
RNF181  
ARHGAP42  
ALDOA  
ANXA2P1  
SH3BP4  
XPNPEP1  
SINHCAF  
FZD6  
RAC1P2  
EIF6  
BCL2L15  
BEAN1  
AC124947.2  
SLCO4A1  
KCP  
MYL12B  
KRT19P1  
SF3B6  
AP001453.3

---

---

CDK6  
TRIM29  
LBX2  
CARS  
MYD88  
RBM41  
EHD2  
CNOT11  
SPICE1  
EREG  
TET3  
ARL6IP1  
PRC1  
BUB1  
AC100861.1  
DNAJB11  
MMP14  
CLDN7  
TBILA  
GPR87  
MLKL  
VPS37B  
TNFRSF10D  
AC068594.1  
MIR222HG  
CD44-AS1  
EPN3  
ADGRF1  
PDP1  
STEAP1  
TPM3  
NRM  
AC068580.3  
CLCF1  
STAT6  
POLD4  
AC099850.3  
RPSAP52  
ABHD11-AS1  
CHP1  
GSDMB  
TP53BP2  
HIST1H2BD  
MYO1E

---

---

AP005233.2  
CTBP2  
B3GNT7  
TNFRSF21  
SLC5A3  
KIFC1  
MAP3K13  
CMTM1  
SH3BGRL3  
CKAP2L  
CASP8  
HKDC1  
CKLF-CMTM1  
LMNA  
KIF23  
KRT17  
TPM4  
5-Mar  
VPS26A  
CDC25C  
SNX33  
CDK18  
PLA2G16  
TRIM16  
MUC20  
BFAR  
CTNNB1  
SIAH2  
SBNO2  
ADAM9  
KDM3A  
JRKL  
TRAF4  
IL17RE  
DPP3  
PIAS3  
SP100  
ABHD17C  
FAM160A1  
DTX2  
MGLL  
GLUD1  
KIF2C  
SEMA3B

---

---

TFPI  
LINC02323  
PIK3CB  
NT5E  
CDR2L  
MUC4  
STK39  
OTX1  
TMEM123  
LCN2  
IER5  
CAV2  
LINC00857  
POLR2H  
GPC4  
TSPO  
ITPKC  
HES1  
UGT1A10  
SMNDC1  
ASPH  
KIF18A  
SDR16C5  
EPB41L1  
SLC39A11  
PPP1R14BP3  
FNDC3B  
METAP1  
AL451042.1  
PARP4  
FER1L4  
KLF3  
ERBB3  
SFR1  
BARX2  
STX6  
STRN  
KCTD5  
MAP4K4  
GMPS  
AC003965.2  
RAB25  
RETSAT  
MKRN2OS

---

---

KRT18P10  
ASPM  
CNNM4  
LINC00941  
IRF6  
CABP4  
RIOK3  
PITX1  
ASF1B  
EIF4G1  
PLAT  
TRIM5  
RNF7  
ACOT9  
CDC42EP2  
PPP1R14B  
EXT1  
C11orf80  
PSEN1  
PAK1  
LRRC8A  
ACSF2  
LSR  
ZNF217  
CELSR1  
RCC2  
KARS  
PRR11  
TNFRSF10A-AS1  
LINC02577  
AC009237.3  
UCA1  
CYB5B  
MKI67  
VEZT  
USP39  
TLCD2  
DSG2  
COL7A1  
GGCX  
SEPT9  
TNS4  
PON2  
RASEF

---

---

AP1S3  
AQP5  
USB1  
NUSAP1  
FAM83B  
GRB7  
KIF20A  
APOL1  
GLRX3  
BAK1  
TSPAN1  
DTX4  
AL590723.1  
RNF39  
IGSF9  
NFKB2  
SEMA4B  
FSCN1  
GPR39  
SMS  
DIAPH1  
CBLC  
ZDHHC7  
RHOF  
AC008760.1  
REEP3  
KIF14  
AJUBA  
LEMD1  
ADAMTSL5  
AC009237.14  
TBL1XR1  
EGFR  
PPP4R1  
ZWINT  
MOCOS  
CKS2  
CENPF  
KCNK1  
HOXA3  
ALPK1  
AC114488.1  
CFL1  
ITGB5

---

---

FA2H  
AC026401.3  
E2F7  
FERMT1  
CD44  
LY75  
KIAA1217  
IL15RA  
ZNF185  
TRIP6  
AC107308.1  
NMI  
EPS8L2  
PDZK1IP1  
NMD3  
MBOAT1  
MYH14  
AC019117.1  
TTYH3  
APH1A  
TLL4  
SHC1  
MELK  
TMEM92-AS1  
MYEOV  
S100P  
SRPK1  
IGF2BP3  
TMC5  
SLC52A3  
TRPM4  
CCNB2  
PABPC1  
SDCBP2  
ERO1A  
NOB1  
SLC25A37  
KRTCAP3  
PGAM1P8  
VMP1  
BICDL2  
PLIN3  
TSPAN6  
VILL

---

---

CNIH4  
CBX3  
ANKRD22  
DLGAP5  
CDCA5  
PRR15  
FOXC1  
TSPAN15  
STAU1  
TAGLN2  
RRM2  
ERLIN1  
ALMS1-IT1  
MSLN  
TMEM189  
SLC20A1  
TTC7A  
BTBD10  
DHCR24  
P2RY2  
TSKU  
ELOVL1  
SMAGP  
CDC20  
LPCAT2  
FLNB  
PROM2  
CORO2A  
ETV4  
TOP2A  
GRTP1  
TJP2  
TRIM8  
KRT8  
F2RL1  
ADGRE5  
UHRF1  
BZW2  
TMOD3  
LRRC1  
PLA2R1  
AL355312.3  
DHX32  
PIEZO1

---



---

ELF3  
PLBD1  
IL1RAP  
MYL12A  
RPS6KA4  
QSOX1  
AC046143.1  
GALNT5  
NQO1  
XDH  
BCL10  
CHMP4C  
PCDH1  
ESRP1  
KIF11  
HTATIP2  
GALNT3  
LDLR  
CKS1B  
AHNAK2  
TRIM47  
FRMD8  
FGFRL1  
CLIC1  
BCL2L12  
MDF1  
TFAP2A  
SLC1A5  
TGM2  
UNC13D  
COL17A1  
EFNB2  
H1F0  
PAQR4  
PLK1  
CAST  
PTGES  
IL18  
NEK2  
TAF1D  
GJB2  
ETV6  
SPINT1  
ABTB2

---

---

KRT15  
MICA  
KPNA4  
MIR4653  
INSIG2  
EFNB1  
SP1  
FUT3  
MALL  
CNN2  
CHMP2B  
ARMC10  
SOX4  
ACTL6A  
CD2AP  
SRC  
INF2  
TJP3  
RARG  
TMSB10  
ACSL5  
TP53I3  
GJB4  
SHB  
MPZL3  
SH3RF2  
OR7E14P  
TMEM44  
UBE2E3  
SMURF1  
CGN  
NKILA  
ADSS  
ARHGAP27  
PMEPA1  
CRYBG2  
SLC39A1  
ERBB2  
OVOL1  
SMAD3  
AGRN  
DOCK5  
MAL2  
S100A6

---

---

CDK1  
RIPK2  
CASP4  
OXS1  
CLDN4  
CKLF  
STYK1  
ECT2  
LMO7  
ASAP2  
CTNNA1  
DKK1  
PROSER2  
SLC35F2  
LINC02041  
TES  
ITGA2  
AHR  
RCE1  
LAMA3  
PAR6B  
ANO1  
LBX2-AS1  
HNRNP  
YAP1  
ATG16L1  
BAG3  
SFXN3  
ALS2CL  
AL451042.2  
STAMPB  
PLEKHN1  
DHRS3  
ESRP2  
ZDHHC3  
ADGRG6  
BLACAT1  
PDCD10  
TMEM105  
TMEM159  
FAM83H  
KCMF1  
INPP4B  
SH2D4A

---

---

FAM129B  
ADAM8  
PTPN12  
ITPR3  
PEX13  
TFG  
NGEF  
PRICKLE3  
S100A14  
HRH1  
EPS8L1  
TMBIM1  
GSTP1  
PERP  
NPAS2  
ALDH3B1  
NDE1  
NFE2L3  
CD151  
BCL2L1  
MACC1  
ARHGAP32  
ABCC3  
RHOC  
IRAK2  
RAC1  
TPX2  
YBX3  
B4GALT5  
HK1  
MGAT4B  
SLC16A5  
RYK  
ZDHHC9  
DNMBP  
PTMA  
GBP2  
ANLN  
EPS8  
MROH6  
PLAUR  
GALE  
MUC1  
HMGA2

---

---

CLDN1  
UBE2C  
STN1  
PRKCI  
IQGAP3  
LY6E  
KRT18  
ANXA3  
C3orf52  
B3GNT3  
TNFRSF10A  
EFNA4  
TNKS1BP1  
PATL1  
SLC2A1  
S100A10  
TMEM139  
RHPN2  
RNF149  
VAMP8  
MELTF  
TNFRSF12A  
PPARG  
PTTG1IP  
ANXA11  
SPATS2L  
EZR  
TMC7  
TK1  
SERPINB5  
TOR4A  
ARNTL2  
PLEC  
SOX9  
ZDHHC5  
CAPN2  
B3GNT5  
HJURP  
AL049555.1  
MPZL2  
JUP  
VASP  
PKP3  
CTNND1

---

---

TM4SF1  
APLP2  
PLEKHA7  
TMEM41A  
SLK  
GNA15  
TNFRSF10B  
YWHAZ  
SDC1  
JPT1  
SLC16A3  
HK2  
EVPL  
TCF7L2  
PPP1R13L  
PHLDA2  
RALB  
RELA  
FOXL1  
TGIF1  
KDM5B  
NECTIN4  
CMTM7  
ITGB6  
CEP55  
KRT7-AS  
ITGA6  
PLCD3  
TLDC1  
MVP  
FHL2  
LIPH  
HDGF  
GRHL2  
KIAA1522  
RRAS  
TMEM92  
TPBG  
TEAD3  
CAPG  
CTTN  
PLCB3  
SSH3  
TACSTD2

---

---

SCNN1A  
ST14  
TUBA1C  
LGALS3  
LAD1  
BAIAP2L1  
C6orf132  
MYOF  
FOXQ1  
LAMC2  
CDK2  
TMPRSS4  
ANXA2P2  
PLPP2  
RHOD  
INAVA  
S100A16  
F11R  
RHBDF1  
EPHA2  
LDHA  
OSBPL3  
ITGA3  
ACTN4  
ANXA2  
SERINC2  
KRT19  
CDH3  
EPHB4  
S100A11  
GPRC5A  
PLEK2  
SFN  
PRSS22  
NET1  
HMGA1  
MST1R  
KCNN4  
FGD6  
PRSS8  
PTK6  
SH2D3A  
CDCP1  
KLF5

---

---

|              |          |
|--------------|----------|
| SDC4         |          |
| C19orf33     |          |
| GJB3         |          |
| CAPN1        |          |
| TRIP10       |          |
| TINAGL1      |          |
| LAMB3        |          |
| KRT7         |          |
| ITGB4        |          |
| TGFA         |          |
| MET          |          |
| RAB39B       | Negative |
| TSPAN7       |          |
| MROH8        |          |
| OTUD7A       |          |
| AC106795.2   |          |
| NAP1L2       |          |
| APLP1        |          |
| MAGEE1       |          |
| IQSEC3       |          |
| PACSIN1      |          |
| SCML2        |          |
| RTN1         |          |
| SEC11C       |          |
| DLGAP3       |          |
| FGF14-AS2    |          |
| NOVA1        |          |
| ATP6V0E2-AS1 |          |
| KCNH6        |          |
| DIRAS1       |          |
| PDZD4        |          |
| ACSL6        |          |
| ZNF540       |          |
| SERPINI1     |          |
| UNC79        |          |
| EDA          |          |
| SYP          |          |
| MAPK8IP1     |          |
| SPTBN4       |          |
| ACTL6B       |          |
| TMEM63C      |          |
| AC027575.2   |          |
| TCEAL2       |          |
| ATP2B1-AS1   |          |

---



---

PAK3  
MPP2  
XKR7  
ELAC1  
SNAP91  
FAM218A  
TENT5C  
MSI1  
CELF4  
ZNF793-AS1  
MYT1  
CYP46A1  
CXorf57  
AC023509.4  
AMER3  
SNPH  
AC007541.1  
RUNDC3A  
UNC13A  
AC012313.2  
GPRASP1  
KCNB1  
CACNA2D2  
EPHX2  
LINC00683  
NFASC  
AL021368.3  
AL162377.1  
CDO1  
AC008808.2  
ZNF582  
AC233976.1  
AC012146.1  
ZNF491  
C5orf38  
TCEAL5  
JAKMIP2  
VLDLR-AS1  
SLC4A8  
BSN  
CCDC92B  
IL6R-AS1  
FAM69B  
SVOP

---

---

GPX3  
SDK1  
CACNB2  
GNG2  
AC006369.1  
LINC02106  
ADGRG5  
AC022893.2  
AC008669.1  
AC104985.2  
SPTB  
SLC8A3  
EML6  
CACNA1A  
DSCAM  
NCALD  
DPP6  
LRRC4B  
NAP1L5  
GSTA4  
NOL4  
FAM117A  
USP51  
RTL5  
PNMA8C  
GPR150  
DUSP15  
ICA1L  
GPR162  
SCN3B  
TMCC2  
SLC25A42  
AL158055.1  
LYRM9  
RAB3C  
LINC01431  
TSPAN33  
NIM1K  
PIPOX  
CHRNA2  
SEZ6L  
CD99L2  
FMN2  
CELF3

---

---

AC074032.1  
OGDHL  
TUBA3FP  
HLF  
NAP1L3  
AC008115.4  
ZNF667  
IRX2  
AL133343.2  
SLC22A17  
SERPINA10  
RIC3  
ZCCHC18  
ZSCAN16-AS1  
CYB5D2  
DUSP26  
SCOC-AS1  
AC005076.1  
GLIPR1L2  
QDPR  
CCDC188  
AC005696.4  
HS6ST3  
CLGN  
WSCD1  
KCNK3  
MAGEH1  
GTSE1-DT  
LINC01128  
CERS4  
AC117489.1  
LIFR-AS1  
LINC02559  
B4GAT1  
INSM1  
LINC02447  
MTUS2  
KCNJ6  
GKAP1  
SLC12A5  
FBXL16  
PPP1R1A  
ANGEL1  
LHFPL4

---

---

SSTR3  
ZNF483  
AL023806.1  
RIPPLY2  
CALY  
SLC25A5-AS1  
FAM155B  
AC008443.4  
C17orf51  
SGSM1  
AP3B2  
CELF5  
RIMBP2  
AL035701.1  
ZNF667-AS1  
BEX4  
FAR2P2  
ATP1B2  
TMEM179  
MAPK10  
GPR135  
REEP2  
SSTR2  
AC138965.3  
RBM11  
CYP51A1-AS1  
ST18  
ZNF236-DT  
MAP6  
SLC26A11  
AC156455.1  
INA  
USP27X  
AC079089.1  
AC010501.1  
CCDC13  
AL139353.1  
SLC29A4  
LINC01963  
NRL  
SLC8A2  
FAR2P3  
CRIP3  
CDK5R2

---

---

BEX1  
A1BG-AS1  
FXVD6  
AC092437.1  
AC015961.1  
FAM135B  
UNC80  
AC078925.4  
BCDIN3D-AS1  
ATP1A3  
SLC38A4  
LINC01484  
SOCS2-AS1  
CPE  
AC009185.1  
ATP6V1G2  
AC140481.1  
KCNJ2-AS1  
ASB16  
AP001486.2  
CXXC4  
ZNF181  
AL137779.2  
AC110609.1  
GNAO1  
ADGRF3  
AL133299.1  
NUCB2  
SEZ6  
AL161938.1  
ANKRD7  
SLC7A14  
C22orf39  
STXBP5L  
ZFP2  
KCNJ11  
LRRC10B  
FAM167A  
LINC00957  
AC010478.1  
LINC01586  
SYT4  
GRIA2  
ELOVL4

---

---

CBX7  
SNAP25-AS1  
HFM1  
KCNMB2  
RFXAP  
FAM184A  
LINC00870  
CRMP1  
MTMR7  
APBB1  
WDR17  
AC010307.4  
CAMKK1  
DDX25  
FGF14  
AL158163.2  
LINC02101  
ATP2A3  
AC016582.3  
AMPH  
RIIAD1  
KCNA5  
AL645728.1  
PNMA3  
CPLX2  
ADCY1  
VASH1-AS1  
PPM1K  
SEPT5  
RFX6  
AC126177.7  
P2RX6  
SCAMP5  
AC084033.3  
RAB9B  
FAM222A  
AC104985.1  
VWA5B2  
DNAJC18  
FBLL1  
PAXBP1-AS1  
SYT5  
AC126177.6  
GCK

---

---

NRG2  
AC120049.1  
AC105277.1  
C16orf96  
TRIM52-AS1  
MAPK8IP2  
SNAP25  
ZNF441  
CDIP1  
AC090617.5  
KIF1A  
RUNDC3B  
AC026369.1  
AC099684.1  
AP000757.1  
GDAP1L1  
AC048382.5  
SHISA7  
FBXO15  
AC112204.3  
ASTN1  
ZNF781  
LINC01014  
NRXN1  
SLC12A5-AS1  
RCAN2  
KIF5A  
PTPRN  
NEURL1  
TECTA  
WNK3  
KLF2P2  
LRRTM2  
KIF5C  
GPR142  
VAMP2  
BSN-DT  
LINC00663  
AC116614.1  
ACACB  
RND2  
LINC00909  
A1BG  
TAT-AS1

---

---

GRM4  
PHF21B  
EFR3B  
AL133325.3  
FBXO10  
FRRS1L  
HMGCLL1  
AL589765.1  
AC005225.4  
AC005498.2  
TMEM145  
LINC01146  
MIR7-3  
AC106795.3  
COQ10A  
ADGRB3  
HHATL-AS1  
INSYN1  
CYFIP2  
AC112204.1  
AL122008.3  
AC005498.3  
KLHL22  
AL391807.1  
AC095057.3  
INKA2  
GRM1  
EFNB3  
ZNF778  
ZNF853  
C19orf81  
GPRASP2  
DPY19L2P4  
SLC25A53  
SCN3A  
GRIK5  
KSR2  
RPS27P25  
CCDC13-AS1  
KHDRBS2  
AC124319.3  
AL845472.2  
ASPDH  
CIRBP

---



---

AL022337.1  
4-Mar  
DHRS4L1  
AC016820.1  
EID2B  
CNKSR2  
ELMO1  
SALL2  
AL391261.2  
TMX4  
AC113554.1  
ZNF157  
PNMA8A  
MIR7-3HG  
PACRG  
NANOS1  
CAMK2B  
SLC6A17  
APOH  
STK33  
MOCS2  
DNAI2  
GRIA3  
AL121929.2  
AC004656.1  
MAP3K15  
SYT3  
AC025175.1  
TTC7B  
SH3GL2  
EPM2A  
HRAT5  
AC087752.3  
GPR148  
LGI3  
SLC1A4  
MIR670HG  
AC090061.1  
DNAH9  
AC129507.3  
NEXMIF  
RGS9  
OXCT1-AS1  
FMC1

---

---

AC091891.1  
NOVA2  
ATP6V0E2  
RASA4  
AC233723.2  
AF279873.3  
RBM26-AS1  
AL358933.1  
PPP4R4  
AL034550.2  
AL355994.2  
TMEM88  
AC114271.1  
ERO1B  
CDH10  
ACAT1  
MAGI2  
ADGRL1  
CNIH2  
NKX2-2  
AC007495.1  
AC008808.1  
ARMC2  
UBE2QL1  
TMEM121B  
AL354920.1  
SLC7A8  
TOGARAM2  
ZDHHC15  
AC091271.1  
AC226101.1  
KIAA1324  
NXF2B  
ABHD14A  
TMOD1  
AL691432.2  
NCAM1  
CAMK2N2  
XKR4  
C3orf14  
UCHL1  
CCDC178  
CPT1C  
LINC01927

---

---

WNT4  
PTPRN2  
ABHD15  
AC091825.1  
AC000068.1  
AC002511.1  
SERP2  
ENHO  
AL139274.2  
AC008438.1  
AC011477.7  
DCT  
LINC01370  
GPLD1  
AC006116.10  
FGF12  
GALNT16  
ADGRD1-AS1  
AC073857.1  
AC012313.5  
NECAB2  
FITM2  
CCDC151  
NLRP1  
GNAZ  
AC087457.1  
AC004832.1  
KCNB2  
NT5M  
DZIP3  
F10  
TRAF3IP2-AS1  
IPO5P1  
AC068473.5  
LRFN1  
HDHD2  
ABCC8  
PSMG3-AS1  
BEND5  
ARX  
AC005355.1  
PHF24  
AC005034.4  
AC097468.1

---

---

KLB  
RNF180  
SBK2  
EXOC3-AS1  
CPEB1-AS1  
NAT8L  
ANKS1B  
SMIM27  
TMEM59L  
AL606970.1  
AC104825.1  
C15orf61  
TMEM151B  
COL26A1  
PPP2R2B  
RPH3AL  
LINC00158  
MTURN  
PPM1E  
MAMLD1  
LINC01284  
ZDHHC22  
GLS2  
FSTL4  
C10orf143  
LINC00334  
AL121601.1  
AL355877.1  
ARHGEF7-AS2  
AC002511.2  
PRRT3  
ZNF287  
KL  
CERS1  
AL583856.2  
LIPE-AS1  
AC008761.3  
TDRP  
CPA5  
SESN1  
GS1-124K5.4  
TMEM132D  
GCH1  
TCP11X2

---

---

C17orf107  
KCNC1  
AC012508.2  
ATRNL1  
AC004877.1  
SLC2A11  
AC006033.1  
EPX  
AL845472.1  
AP003559.1  
TTC41P  
GDAP1  
RWDD2A  
AC036176.1  
FAM104B  
ZBED3-AS1  
ZNF658  
AC107081.1  
AC099521.1  
TCP11X1  
TRAM1L1  
BEX2  
POLR3H  
PCP4  
AC092574.1  
SNTG2  
IRX1  
AGBL4  
KLHDC1  
JPH3  
AC091152.4  
SAXO2  
AC006012.1  
PCDHA1  
SH3GL3  
ATP8A1  
ELAVL4  
AL390208.1  
PCSK2  
PPP1R42  
KCNN3  
GNG7  
ZNF583  
CTXN2

---

---

CD200  
ZNF582-AS1  
AC068338.2  
AC239367.3  
SEC14L5  
DTNA  
AP003721.4  
MAST3  
AC106795.5  
SCG3  
AC063926.1  
KIAA0319  
FAM110B  
AL133419.1  
SNTG1  
AL022332.1  
AP000892.2  
PCDHB1  
SCG2  
AL596244.1  
F7  
FKBP11  
ACTR3B  
AC092119.3  
AC022417.1  
AC009163.6  
CASKIN1  
PTPRT  
AC027807.1  
ABAT  
FOXP2  
KCNH3  
MARK1  
PAX6  
AC096733.2  
NBEA  
TRIM9  
AC125257.1  
AC006538.1  
CFC1  
C1QL1  
NPAS3  
PEMT  
AF111167.2

---

---

CACNA1B  
SYT14  
FGF17  
AC127070.1  
GARNL3  
C3orf18  
AVPR1B  
AL512791.2  
KCNN2  
AL442663.3  
CPEB1  
AC129507.2  
ERVK9-11  
C22orf42  
LINGO4  
FO393419.3  
DNAI1  
AL133325.2  
AL009181.1  
SLC6A16  
SLC6A4  
PPP1R3F  
SRR  
KIF6  
FAM227B  
TRO  
CHST10  
TEX38  
MAP7D2  
ZNF280B  
AC010624.2  
MGAT4C  
CAND2  
C21orf58  
NYAP1  
SSR4  
AC015967.1  
TSPYL2  
ZSCAN18  
AC116003.3  
MAST1  
AC009102.2  
KATNAL2  
CYP4F24P

---

---

AC005224.1  
AC021242.3  
CCNA1  
MXD4  
AL138690.1  
10-Mar  
MLYCD  
RNU7-171P  
TUNAR  
AC120498.10  
AL049796.1  
TMEM178B  
TNRC6C  
AC079610.1  
FYB2  
RTN4RL1  
FAM120C  
AC104051.2  
MIR153-1  
SYNGR4  
TMEM74  
HAO1  
TMEM198  
SARM1  
AL121672.2  
PLPPR1  
AC012158.1  
MYL7  
ZNF709  
VWC2L  
C14orf132  
PELI3  
LINC02458  
KBTBD6  
LINC00644  
AC098484.2  
LYRM7  
MEG8  
ATP8A2  
PCSK1  
ZNF671  
LRRC4  
DKFZP434H168  
AC100793.4

---



---

GHR  
AC007563.1  
FAM57B  
LRRC37A5P  
LINC00643  
SCG5  
DPH1  
AL031595.3  
SOCS2  
OSBPL6  
AC109454.2  
LRP2BP  
FICD  
AC010327.4  
AL603910.1  
AC005730.2  
LRPAP1  
PART1  
UBE2D4  
ZNF569  
MAPT  
GABRG2  
TMEM170B  
RAPGEF4-AS1  
RAB3A  
FAM184B  
ANK2  
SMIM10L2A  
FRY-AS1  
KCNJ8  
ARSG  
C18orf32  
PDCD6IPP2  
LANCL2  
LINC01942  
PITPNA-AS1  
AL031658.2  
B9D1  
AC037459.2  
DRC3  
JAKMIP3  
SLCO5A1  
AC008966.1  
AL589765.7

---

---

LNP1  
LINC00900  
AC096734.2  
AC126283.1  
PTENP1-AS  
LINC01531  
PLD6  
AC007221.1  
NR0B1  
LY6H  
PRLR  
CRHBP  
MDH1B  
ARHGEF26-AS1  
USP2  
RSPH9  
SNCB  
UNQ6494  
EPB41L3  
DPH6-DT  
SPATA4  
DNAJC27-AS1  
AC093510.2  
WASF3  
C9orf147  
ZNF821  
MED9  
LINC01018  
CADPS  
AL662844.4  
ZNF467  
LOH12CR2  
AC010980.2  
AC012513.1  
SELENOKP1  
GPR158  
AC009126.1  
FAM131C  
FSIP1  
AC012513.3  
SEPSECS-AS1  
ISL1  
AC079385.3  
AF186192.2

---

---

ZNF843  
AC015819.1  
SCGN  
LRRTM4  
AMIGO1  
ZSCAN1  
ARNT2  
AL133520.1  
TMPRSS6  
AC091167.4  
RLN1  
KCNJ6-AS1  
AC008743.1  
TACR1  
AP002847.1  
NRSN2  
WDFY3-AS2  
DNAJC6  
DMRTC1B  
METTL16  
CARMIL3  
TXNDC15  
BX284668.2  
LINC00641  
AC026471.2  
DYNC1I1  
JAKMIP1  
BTBD17  
LINC00907  
ZNF660  
AC093642.2  
AF186192.1  
RAB6C  
11-Mar  
ZIM2-AS1  
DRAIC  
ATP2B2  
CCM2L  
SLC35F3  
NRCAM  
LRRN3  
ZFP3  
PRKN  
TMEM196

---

---

PPP5D1  
NUTM2B  
AC010980.1  
BX842568.4  
AC117457.1  
ITPR1-DT  
AC090241.3  
SLC43A2  
CCDC110  
AC025162.2  
HAR1A  
AC015961.2  
NIPSNAP3B  
TUB  
AC239585.2  
KANK1P1  
BX649632.1  
Z97653.1  
LHFPL1  
LINC01522  
Z97989.1  
PDXP  
ANGPTL5  
SNTA1  
NUDT9  
AC133540.1  
EID3  
TMEM151A  
CAPSL  
SYT7  
RXYLT1  
GALNT13  
BRINP2  
FFAR3  
HEIH  
AC112219.2  
AC015726.1  
KCNJ3  
RNF157-AS1  
SCRT2  
CGRRF1  
AC012640.2  
AC010226.1  
GPC5-AS1

---

---

AC007938.1  
C5  
AC107952.2  
AC063926.3  
NEUROD1  
CACNG2  
USHBP1  
KCNH2  
CCDC62  
AC069224.1  
PPP1R3E  
USP27X-AS1  
ZBED3  
TTC23L  
ZNF542P  
GRK4  
DYNLT3P1  
AC092720.2  
S100Z  
CACNA1C-IT2  
ADGRV1  
TMED8  
AL353743.1  
AC023762.1  
AC116609.1  
ZKSCAN2  
USP20  
GPR119  
AC008403.3  
ASXL3  
ZNF596  
RTL9  
SPATA7  
MAN1B1-DT  
DNAJC28  
RLN2  
CHGB  
AC004836.1  
AC064801.1  
AC008667.2  
SLC45A2  
SLC16A12  
ERP29  
ZNF835

---

---

CLIP3  
BEX5  
EFCAB8  
AC138356.2  
AC005962.1  
AFF3  
FGFBP3  
AP001267.3  
AC104986.2  
PKMP3  
CACNA2D3  
SRSF12  
BRD3OS  
RN7SL832P  
AC124016.2  
TCEANC  
NDUFA6-DT  
PCDHB4  
OAZ2  
AL121583.1  
ZNF497  
MVB12B  
PCLO  
RAB39A  
AL022313.4  
PCSK1N  
RPL10P11  
GDF11  
RPL34-AS1  
PRADC1  
UCN3  
AL137028.1  
CFAP53  
AC097641.1  
AMER2  
AL117339.4  
AC011444.2  
AC004023.1  
NAT16  
RAMP2-AS1  
KAT14  
CCDC184  
DMGDH  
AC007686.3

---

---

ZDHHC11B  
AC024075.2  
AC127070.2  
MED14OS  
AC066612.1  
SARAF  
CRYBA2  
AC002451.1  
AF111169.3  
FTCD  
RTCA-AS1  
AC005837.1  
AC245297.1  
DSCAML1  
STXBP1  
SYNGR1  
IRAK1BP1  
GAD2  
ZCWPW2  
LRP3  
RGS7  
AL022068.1  
AC027281.1  
TNR  
AC022107.1  
RIMS2  
AC079140.3  
SV2A  
SAYS1  
AL161772.1  
AL356489.2  
VLDLR  
TOM1L2  
CRY2  
LINC01863  
AL357146.1  
LINC00271  
APH1B  
TTC25  
KCNMA1  
CCDC175  
AF106564.1  
KIF9-AS1  
ZNF132

---

---

TMEM254-AS1  
AC097461.1  
LONRF2  
AL354707.2  
C18orf65  
CBX6  
RGS22  
CCKBR  
AC087500.1  
ZNF554  
ARIH2OS  
ST8SIA3  
AC103736.1  
AL162171.1  
KCND3  
LRRC37A3  
AC104333.3  
AC105339.1  
FAM122A  
HCN2  
PCBP3  
TBL1X  
CYP4F62P  
NAMA  
CROCC2  
ZNF571-AS1  
AF131216.4  
C1orf158  
RPS20P22  
CKMT2-AS1  
CYCSP8  
RFPL2  
ZNF568  
DCLK2  
HMGN2P15  
TENM1  
AC008050.1  
RAPGEF4  
MAN1C1  
NMNAT3  
NME5  
AC108475.1  
RAB26  
AC121761.2

---



---

AL035071.1  
AC005920.3  
ALDH5A1  
MYO3A  
AL512604.3  
TLL1  
AC015540.1  
CNNM3-DT  
AC009570.1  
AC012508.1  
AL096711.2  
LINC01715  
QSOX2  
NPR1  
AC104806.2  
PSPN  
NLGN4X  
AC063926.2  
KARSP2  
AC087071.1  
AC006116.8  
VGF  
AL049543.1  
SYNE1  
ADAM29  
TATDN3  
LINC00526  
ATCAY  
ALG14  
AC004597.1  
SOCS2P2  
LINC00602  
SLC25A4  
SETBP1  
AC121338.2  
AC006449.6  
AL138688.2  
PCDHA2  
SRCIN1  
AC026691.1  
ZHX3  
EGFL7  
AC064807.2  
AQP4-AS1

---

---

AC110998.1  
MIR670  
DNAH6  
MTNR1B  
ST3GAL3  
LINC00476  
PARD6A  
HS3ST4  
REM2  
CEP126  
SLC7A2  
SCRT1  
AC109454.4  
MAGEL2  
CDADC1  
RBP7  
TP53TG3D  
RASD1  
AP000802.1  
SOX5  
LY6G5C  
AC005062.1  
AC243830.2  
TAGLN3  
C2orf73  
AC104109.2  
ESRRB  
AC008758.6  
RNF157  
LSINCT5  
ST7-AS1  
SERTM1  
AC020558.2  
AL356599.1  
CFAP61  
SRP14-AS1  
AC012313.8  
AC138965.2  
AC103952.1  
AL359710.1  
AC025871.2  
PDE3B  
OR7E47P  
FAM228B

---

---

MOB1B  
AL118558.4  
IFFO1  
PRKAR2B  
AC012360.1  
PLCXD3  
PCDHA3  
AC007780.1  
LINC02495  
ZNF844  
PARVB  
HPCA  
METTL7A  
AC034243.1  
AC091153.3  
IGLVIV-59  
CERK  
POMT1  
GABRB3  
PSD  
AL136304.1  
USP30  
MCF2L2  
SLC6A13  
SLIT1  
AC073316.3  
CD320  
SFRP1  
C12orf60  
ISCA1  
RN7SL336P  
AC020934.1  
TMEM232  
AL355297.3  
TPPP  
ERICH3  
AC010536.3  
AC046185.2  
ANGPTL3  
DLG4  
AC009812.1  
AL157788.1  
AL359764.1  
PGBD5

---

---

KLF2P3  
AL022324.2  
EML5  
CLUL1  
AC105020.5  
AC024257.5  
SDHCP4  
LIPJ  
AC064807.4  
COPS3  
AC012213.4  
BRSK2  
OLFM1  
TSPEAR  
SERPINE3  
CRTC1  
SH2D3C  
LINC01976  
HAR1B  
PRR34  
CDS2  
AC016705.2  
AC004947.2  
KLKB1  
SOBP  
HDHD5-AS1  
NKX6-1  
FAM229B  
AC106047.1  
AL358781.2  
AC113615.1  
RGS11  
ZNF602P  
AC012213.1  
CHRM5  
SMIM32  
PABPC5  
AC011290.1  
MAP2  
TAT  
LAMA5-AS1  
PTGDR2  
SLC12A1  
GPR27

---

---

SCAMP1-AS1  
AC011899.1  
FLG-AS1  
DIS3L  
ARL15  
ZMAT1  
GJD2  
KNDC1  
TMEM38B  
ATP9B  
CACNA1C  
SLC9B1  
TBC1D13  
ZSWIM2  
AL117192.1  
AC243562.2  
MEG9  
SOCS7  
OTOGL  
TCTN1  
CAPS2  
TCEAL3  
NAPB  
STXBP5-AS1  
AP002360.1  
AC010624.1  
ZC3H10  
AL451085.1  
TRMO  
VN2R17P  
MYO16  
AC023632.2  
HSD17B14  
TCEAL1  
SIL1  
CLU  
WDR7  
AL359513.1  
ZNF429  
CXorf58  
RFESD  
PPFIA3  
AC096644.1  
TMOD2

---

---

FAM153C  
CETN4P  
AC055811.2  
GEMIN7-AS1  
AC011008.2  
KCNK16  
AC107982.3  
SPAG6  
FAM171A2  
AC105052.4  
PEG3  
SPINK9  
HCG2040054  
SLC35F4  
ZNF674-AS1  
SLC23A2  
AC008543.5  
ULK2  
OPRD1  
C5orf49  
ADCK1  
AC011477.3  
RTBDN  
LYSMD2  
GPR179  
ZIK1  
NXF5  
RAB6C-AS1  
DISP2  
RAMP2  
AP003108.5  
TIMM22  
LINC01529  
FFAR2  
AL353746.1  
AL161658.1  
NACAD  
RNF182  
C8orf86  
COX6CP13  
PWRN4  
PLPPR2  
SLC46A1  
UCHL1-AS1

---

---

LRRC9  
PAIP2  
CYP4F30P  
RAB36  
AL592293.1  
AL645924.1  
CYP4F32P  
MICU3  
AL355990.2  
FEM1A  
SEMA5A  
AL513165.1  
DENND2A  
PDCD4-AS1  
AL022069.2  
AC051619.5  
AL138752.2  
TMEM192  
AC027307.3  
AL022324.1  
CDKN2AIPNL  
TRPC7  
CES4A  
CPB2-AS1  
LINC01750  
MYO18B  
LINC00515  
AL731684.1  
AC021752.1  
ZNF658B  
AP003486.1  
AL135999.3  
ENPP2  
GADD45G  
PROX2  
POU6F2  
LINC01765  
HCN4  
DPF1  
PHACTR1  
Z83847.1  
OTULINL  
ELL2  
SLC25A14

---

---

RXRG  
AC023830.3  
LINC01554  
SGK3  
FGFR1  
AC112184.1  
MBLAC1  
NRIP2  
DDC  
AL590787.1  
SARDH  
AL121768.1  
AL035250.2  
AL121758.1  
GPRIN3  
PIGP  
FGF12-AS2  
PAUPAR  
PARM1  
AC004803.1  
MAFB  
AL021396.1  
AC107398.3  
AC128687.2  
AC048351.1  
TPI1P2  
CTNND2  
PGR  
AL353719.1  
RN7SL268P  
FAM163A  
AC008752.2  
AL162412.1  
AMDHD1  
LINGO2  
SCN8A  
RAI2  
CLEC3B  
SLC36A4  
PRR18  
MCOLN3  
FNDC5  
BRINP1  
PCDH10

---



---

POU6F2-AS1  
AL442128.2  
AL163051.1  
DAO  
FAM107A  
BLMH  
NCOA5  
PYY2  
AL133320.1  
AC026367.1  
KHDRBS2-OT  
LINC02001  
AL160286.2  
ZNF14  
IGLL3P  
KRT222  
ENO1-AS1  
C3orf33  
MANSC4  
FLJ37453  
AC006942.1  
AC010624.3  
AC012603.1  
AP5S1  
AC025211.1  
PGBD1  
AL356740.1  
AF274858.1  
PANO1  
KRT33A  
CYP2U1  
AL158163.1  
AC091860.2  
AC072061.1  
AC020928.1  
AC012313.10  
CERKL  
ASCL1  
LINC01091  
RNF150  
CDK2AP2P2  
FAM201B  
AC011487.1  
AC097468.2

---

---

TRPC7-AS1  
CFAP161  
THAP7  
AC087501.4  
DLG2  
TMEM72  
AL079301.1  
PIK3CD-AS2  
SLC4A10  
GNG4  
ATP5PBP5  
AP001627.1  
RAB11FIP3  
DIRAS3  
CFAP70  
ARHGEF9  
MIR600HG  
DUX4L27  
AL022329.1  
BX649601.1  
C10orf53  
KDM8  
PEBP4  
AC016257.1  
AMACR  
USP41  
NPHS1  
CA10  
AC073508.3  
ZNF594  
LINC00266-1  
NDRG4  
MOCS1  
AL391069.3  
SDCBP2-AS1  
AC008806.1  
AC087683.1  
LRRN2  
SIDT2  
FEV  
AQP4  
NPM2  
DNAJC30  
GNAS

---

---

LRCH2  
MESTIT1  
ZFP82  
HECW2  
FAM174A  
HMGB3P32  
MAPK4  
AP001972.5  
RPL12P47  
TSPOAP1  
MDP1  
FBXL21  
CCDC38  
KCNJ2  
AC004696.1  
SCARNA11  
SLC35F1  
AC244669.2  
AC026801.2  
AL353743.3  
BBS5  
LINC01779  
AL138960.1  
AC004540.2  
KCNK17  
WVOX  
AC063979.2  
SERPINF2  
TUSC8  
AC092667.1  
AC127024.3  
C14orf178  
AL359853.1  
R3HCC1  
KIRREL2  
P2RX5-TAX1BP3  
AC104232.1  
AC008629.1  
CXorf67  
AC244035.1  
C8orf48  
TUBB1  
FAM216A  
AC087623.3

---

---

FAM19A4  
VPS33A  
ZSWIM5  
THTPA  
LMO1  
ADCY2  
8-Mar  
ADD2  
ILF3-DT  
SIK2  
RPS6KA6  
AC005899.3  
AC025048.2  
AC004825.2  
SEPT7-AS1  
LINC00888  
EFCAB6  
AC083964.2  
AC026748.1  
CITED2  
AL355432.1  
AC079949.1  
LCMT1-AS1  
LRRC24  
AL356489.1  
AP001160.3  
AL035427.1  
AL731566.2  
RNF167  
FAM169A  
IRS3P  
SNAI3-AS1  
KLLN  
PRPS1  
SYN1  
ALKBH5  
WIPF3  
NXPE3  
SHANK3  
AC004543.1  
SEMA3G  
CA11  
AC005410.2  
NSMCE3

---

---

MIS18A-AS1  
EFCAB12  
GNB3  
JADE1  
AP001533.1  
MAPK11  
ZNF607  
TMTC1  
RFPL1S  
ID4  
AC108704.1  
MED31  
C17orf75  
AL390783.1  
TBKBP1  
ZNF18  
AC074351.1  
ZNF625  
ATP5F1A  
SPECC1L  
AC091965.4  
PRRT1  
RIMBP3  
NLGN1  
AC053527.1  
AL136531.1  
OXGR1  
CORO2B  
CDC37L1-DT  
AOX1  
FLJ38576  
ZNF710-AS1  
CEP83-DT  
AC008250.1  
TSPAN19  
LINC01952  
AL358472.2  
DGCR6  
ATP8B2  
BRF1  
SMDT1  
SCGB1D5P  
PNMA8B  
RNF212

---

---

AL360295.1  
AC073911.3  
JAZF1-AS1  
INKA2-AS1  
LINC01534  
AL691515.1  
PEBP1  
AL109947.1  
AC112236.2  
ZNF396  
LINC01985  
CHGA  
POTEI  
DAB1  
TNS2  
CFAP99  
SYS1-DBNDD2  
U62317.3  
AC015689.1  
AC124319.2  
SGSM2  
GRM7-AS3  
AL035420.3  
AL137784.3  
GTF2IRD1P1  
KCNT2  
CADM1  
AL022328.4  
AL079343.1  
CHST8  
RF00066  
AC092296.2  
TMSB15B  
MOAP1  
USH2A  
CNBD2  
POTEJ  
ZNF559  
AC104063.1  
AC012640.5  
CCDC96  
C1orf194  
AL109811.3  
BTF3P14

---

---

FBXL17  
AC004221.1  
ZCCHC3  
UNC119B  
PWAR6  
YIPF7  
AC011450.1  
AC127024.6  
TXNL4A  
AC092535.1  
ANKRD46  
LINC01664  
FSD1L  
LINC02226  
GPR173  
TBC1D9  
SMPD1  
C1QTNF4  
LINC02251  
ENAM  
GSTM2  
AC007406.5  
AL590399.4  
RASGRF1  
EVL  
AL133279.1  
MAPK12  
AC068620.1  
ARHGEF26  
AC016582.1  
AL356019.2  
AC002470.1  
SSTR1  
LMO3  
U47924.2  
DPY19L2P2  
EFL1P1  
CCDC87  
MTMR3  
AL355297.4  
GPR158-AS1  
AC099568.2  
AC124303.2  
AP004609.3

---

---

PDK4  
AC084036.1  
UCK1  
NKAPP1  
AC079610.3  
RUNDC3A-AS1  
METTL21EP  
AKAIN1  
FAM237A  
ANKRD36BP2  
RAP1GAP2  
LRRC73  
LINC00562  
UOX  
CALM1  
PDE2A  
TSHB  
AC123768.3  
AC025284.1  
FAM47E  
AOX3P  
DCX  
IKZF4  
AC099684.2  
PAPPA2  
SHANK1  
AC005911.1  
AC015909.5  
NUDT9P1  
TMEM132B  
EMCN  
ABCA5  
LIFR  
AC034228.2  
PKIG  
AQP7  
RN7SL305P  
CIDEB  
HMGB1P44  
SERPIND1  
NEFM  
MRLN  
AC124242.1  
ZNF382

---



---

AP001496.2  
AC061961.1  
CSRNP3  
AP001781.1  
FXN  
FFAR1  
SLITRK2  
NSG2  
VN2R19P  
LINC01567  
GOLGA7B  
TTYH2  
AC010300.1  
AC016907.2  
ALOX12P1  
APBA1  
ARVCF  
AC009088.1  
AC074029.4  
ARG2  
CRADD  
AC138207.3  
OGFOD3  
AC011444.3  
FAM172A  
ZNF876P  
SAPCD1-AS1  
PHYHIPL  
KCNA2  
AP003072.4  
AMZ2P1  
ELOVL2  
AC087500.2  
RN7SL693P  
RFX2  
AC024361.2  
AC090993.1  
HYDIN  
AC079949.2  
CYB561D1  
SNAI1P1  
AL021997.2  
KIF3A  
FGF12-AS3

---

---

GPR6  
PRODH2  
SNORD113-3  
AC105383.1  
FUNDC2  
MAP1B  
AC138356.1  
CCDC65  
GABARAP  
AL080250.1  
RPS6KL1  
ZNF625-ZNF20  
MRM3  
TIGD6  
GRK3  
ATP6V0A1  
GPR42  
CUBN  
ARHGAP19-SLIT1  
SH3BGR  
DCDC1  
GGA2  
AC035140.1  
AC110079.2  
AL359317.2  
GRK1  
PCYOX1L  
GDF9  
ADORA2A  
MIR4488  
GNRH2  
KBTBD7  
AC066612.2  
STC2  
LCMT2  
NKAPL  
AC092335.1  
AL121932.1  
AC091965.1  
AL162231.1  
MIR3682  
ZNF775  
RPL3  
MED12L

---

---

GALNT11  
AC105020.6  
KCNC2  
AC079760.1  
ADAMTS18  
SLC30A4  
SRRM3  
AC004882.1  
KIZ  
SLITRK1  
ECHDC3  
AF127577.5  
PNPLA7  
TCTA  
AC119751.3  
H1FNT  
AC254562.3  
AL138820.1  
SNHG14  
AL589739.1  
CHST9  
TAL1  
AC024587.2  
TMED6  
NAA20  
AC005775.1  
NPAS4  
LINC00533  
CFAP65  
SEPHS1P1  
PMM1  
DPH5  
AC015819.2  
FLJ37035  
BRS3  
C6orf118  
CTBP2P6  
LINC02044  
RN7SL417P  
GOLGA8M  
AC009560.1  
SEPT7P9  
AC005593.1  
PDCD4

---

---

Z97055.2  
IGFBPL1  
FOXRED2  
AC090921.1  
ZNF10  
A2M-AS1  
GNAS-AS1  
CACNA1I  
RN7SL121P  
AC011445.1  
AC079385.2  
FLJ31104  
TUSC3  
STAT4  
LINC01998  
ZNF253  
AC135507.1  
SLC24A5  
LINC02082  
WRB  
PTPRS  
PRKAR2A-AS1  
AC005393.1  
BRSK1  
AC011933.3  
RADIL  
AC024580.2  
DIRAS2  
MCF2L  
DPY19L2  
CCDC158  
NPM1P47  
SMIM10L2B  
ELP1  
AL591501.1  
AL391261.4  
MBLAC2  
ZNF682  
LINC00535  
AC092634.3  
AC090241.2  
C17orf100  
SPAG8  
MMD2

---

---

|         |             |          |
|---------|-------------|----------|
|         | AC090531.1  |          |
|         | AP005131.7  |          |
|         | ATOH8       |          |
|         | FRMPD1      |          |
|         | AC012213.2  |          |
|         | FOXN4       |          |
|         | AC011511.1  |          |
|         | AL133279.3  |          |
|         | AC004147.4  |          |
|         | MCMDC2      |          |
|         | G6PC3       |          |
|         | LINC01901   |          |
|         | AL512408.1  |          |
|         | Z95115.1    |          |
|         | AC139100.1  |          |
|         | CRB1        |          |
|         | COPS4       |          |
|         | DHRS2       |          |
|         | TMEM61      |          |
|         | LIN7B       |          |
|         | AC107464.1  |          |
|         | ISCU        |          |
|         | UBOX5       |          |
|         | FBXO9       |          |
|         | RN7SL771P   |          |
|         | SNORD115-45 |          |
|         | AC068338.3  |          |
|         | AL118558.3  |          |
|         | FLG         |          |
|         | CTTNBP2     |          |
|         | GIN1        |          |
|         | STX18-AS1   |          |
|         | AC245140.1  |          |
|         | MTERF2      |          |
|         | RAB6B       |          |
| IGF2BP3 | HSH2D       | Positive |
|         | AC023347.1  |          |
|         | IPO8        |          |
|         | KRT8P25     |          |
|         | FDFT1       |          |
|         | AC092569.1  |          |
|         | EVX1-AS     |          |
|         | KCNK5       |          |
|         | SALRNA3     |          |

---

---

LINC01068  
PRRC2B  
AC090151.1  
AC106876.1  
CRTC2  
RRP9  
PRPF38AP1  
RNF207  
DNAJC19P5  
AC093001.1  
AC092117.2  
CTSH  
GRID2  
SENP5  
AC124283.3  
ALG1  
RAB32  
ERG28  
LCN2  
AC079768.1  
SWT1  
AL158824.1  
UST-AS1  
BCAR1  
AC005481.1  
AC026410.1  
LINC00922  
CIAPIN1P  
AC026333.3  
TFF2  
RF00406  
OR7E25P  
AL365217.1  
TAS2R13  
PDGFB  
CEACAM22P  
RNA5SP73  
ELFN1-AS1  
HLA-C  
SLC9C1  
FNBP4  
AC073593.1  
FGF20  
AL356235.1

---

---

SLC9A3  
NBPF14  
UBAP2  
LINC01127  
AC004832.5  
AC016745.2  
MARCO  
AF131216.1  
POLR3E  
SLC25A39P1  
LRRFIP2  
LAMA4  
TPT1P11  
MPRIP  
KRT5  
AC245100.7  
PSMG2  
AL359740.1  
MIR4706  
NRARP  
AC002383.1  
OR4D12P  
AC005546.1  
AC007919.1  
TTC33  
CTSC  
COQ10BP2  
SLC26A5  
AC020922.1  
RSBN1L  
MIR4525  
RNU1-106P  
UBQLN2  
ERH  
ZNF880  
TGFBRAP1  
LINC01271  
AL358115.1  
IDO1  
NPM1P38  
PRDX3  
RPS3P2  
RCN1  
NME1-NME2

---

---

SOCS5P2  
LGALS7  
GBA  
RNU6-1078P  
AL157398.1  
PPIP5K2  
AP005329.2  
BET1  
AL035401.1  
MMAA  
HOXD11  
YWHAEP1  
AC010186.3  
AGBL1-AS1  
AP006193.1  
LCA5  
HNRNPCP8  
AC020909.1  
AC073367.1  
PSMD3  
BRMS1L  
TMEM256P2  
MIR3617  
ZNF646  
ESRRA  
FAM160A1-DT  
GLRA4  
PPP1CC  
AC023157.3  
AC105118.1  
PRKAA2  
AC087311.1  
AC019109.1  
SELENOTP1  
TTC17  
CLRN3  
CHST15  
HNRNPA3P7  
LINC02516  
MIR3155A  
PPFIA4  
PLEKHA8P1  
AC024937.1  
LYRM4-AS1

---



---

ANKRD36  
PIPSL  
CTSK  
AC097523.2  
STIM1  
AC009237.1  
SMIM34B  
AL121612.1  
RPL32P35  
NDUFB4P4  
RNA5SP273  
CFL1P2  
RNU6-91P  
FTH1  
ANGPTL2  
AC027315.1  
SLC7A11-AS1  
FEN1  
CCT7  
SNRPCP4  
IRF2BP2  
XRCC1  
GPA33  
AC005392.3  
NADK  
AL356801.1  
MIR6512  
GDF5OS  
BCLAF1P1  
AC078845.1  
AC020633.1  
SCIN  
MEX3B  
HRCT1  
MIR4254  
AC145146.1  
SIN3A  
AC009313.2  
LINC00974  
AC024581.1  
MID1  
SNX25P1  
AC093668.2  
AL022344.2

---

---

ALDH1A3  
OR1J4  
TMPRSS11F  
RNA5SP435  
CA9  
RABGAP1  
CALM3  
ZNF462  
IRF3  
AC008752.1  
AC020978.5  
GTF3C4  
ATP5PDP4  
ZNF223  
XXYLT1-AS2  
AL590240.1  
SHLD2P2  
VTA1P1  
LUCAT1  
HTR1B  
AC011676.2  
AC012184.2  
FAM72C  
PTMAP1  
BST1  
HDAC2  
GALNT1  
NBAT1  
FANCL  
OGA  
AC096656.1  
LRP11  
KRT16P6  
CPNE1  
DHRS7  
BNIP3P4  
OPHN1  
TMEM164  
AL390729.1  
GGH  
MRPS36P2  
MIR151A  
SOX11  
AC025165.3

---

---

PAX8  
BORCS8-MEF2B  
GORASP1  
RPS26P41  
DIABLO  
AL445490.1  
AP001931.1  
MCCC2  
AC025419.1  
HIST2H3D  
NEU2  
LINC01833  
SMARCAL1  
MIR6889  
STOML3  
OR7E122P  
ROR1  
FLAD1  
HPSE  
AC087439.1  
LYAR  
AL121761.1  
AC023813.2  
AL512353.3  
PXDNL  
AKR1C3  
AC019226.2  
RF00575  
PLEKHM1P1  
SIPA1L3  
AC092647.2  
PJA1  
CRKL  
OR5M6P  
AC008782.1  
ACTG1P3  
TMEM132A  
CCNL1  
BLVRA  
CYLC1  
PP2D1  
PCNPP3  
GAREM1  
ZFAND3

---

---

C1QTNF12  
HADHA  
DUSP9  
CCDC18  
RNU6-935P  
ZNF485  
IQCK  
PFKFB3  
AL132780.2  
PTPDC1  
AC008687.1  
TSPO  
RPP25  
NEPNP  
C7orf57  
TEX13B  
LINC02492  
PGAM5  
UPK3B  
VPS41  
AC007362.1  
ZNF621  
POLA2  
C1orf131  
AC040970.1  
YY1AP1  
AC244093.5  
TMEM47  
AKAP5  
LRCH4  
AC073325.2  
MND1  
RN7SL377P  
AL356274.1  
DSE  
NKAIN4  
PPFIBP2  
AL121820.1  
TSPAN17  
FDPSP8  
FAM76B  
AC103705.1  
AC068305.1  
KRT3

---

---

TGFB1I1  
AC129926.1  
PMM2P1  
AL360268.2  
AC105429.1  
HIST1H3C  
MROH7  
GRPEL1  
ACRV1  
LINC02142  
CYP24A1  
TNS3  
HMGN1P37  
CASC9  
PAICSP6  
TMEM69  
RPL22P24  
PCGF1  
GAPDHP14  
AC021066.1  
AL138752.1  
CYP2G1P  
AC243773.1  
DCAF6  
ATP5F1AP10  
PTP4A1  
OST4  
TAF4B  
AC084783.1  
COMP  
MAPKAPK3  
CCDC138  
RAI1  
AC079804.2  
PCNX3  
DUSP14  
TMEM189-UBE2V1  
HAPLN1  
ADIPOR2  
AC007318.1  
AL356421.2  
AP003478.1  
UGT1A8  
AL080312.1

---

---

ACTBP1  
VENTXP3  
TSPAN13  
TIMM9P3  
SNRPE  
DHRS1  
AL591845.1  
NUAK1  
KIAA1143  
TOMM20P4  
ZNF664  
PDPK2P  
AL354707.1  
PAPOLG  
SLC30A9  
NFKBIZ  
AC003070.1  
ALKBH8  
GPR160  
AC016909.2  
CXorf49  
SOX7  
AC106864.1  
NKX3-2  
AC087575.1  
ZMIZ2  
TRIM32  
THEM6  
GEMIN2  
SNORD65C  
TMSB4XP1  
RAP1BP3  
AC091588.3  
RNA5SP351  
INSC  
AC004870.4  
PIGC  
BUD13P1  
AC022336.1  
LINC01106  
TRBJ2-1  
HIBCH  
SPON2  
AL731556.1

---

---

ZNF469  
LINC01673  
UBE2Q1  
MXI1  
SMARCA5  
PSMA4  
SMG1P5  
THEGL  
CATIP-AS2  
CISD2  
EMC3-AS1  
METTL6  
GADD45A  
E2F5  
AC073316.2  
AL121772.1  
ACTR3P2  
FOXC2-AS1  
MIR3149  
SAAL1  
AL451142.2  
NIFKP2  
FOPNL  
AL162511.1  
TXNP7  
AC008277.1  
TIMM8A  
LINC01980  
AC068491.2  
PFDN2  
BBC3  
MTND4P26  
AC024580.1  
AL353804.2  
MIR3680-1  
HIST1H1D  
IKBIP  
AC069542.1  
RNF5  
BAIAP2L2  
NOTCH3  
ATXN7  
BX293995.1  
AL390728.4

---

---

LATS1  
AP001282.1  
RNU6ATAC22P  
AC063962.1  
POLR2K  
MTERF1  
BTF3L4  
EYA3  
LINC01338  
LINC01145  
METAP2  
HCG4P8  
AC093292.1  
AL139022.1  
PTPRG  
PSENN  
FBP1  
RPL23AP39  
RP1  
RPL23AP15  
CCDC114  
ONECUT2  
AC108136.1  
HSP90AB2P  
FOXJ2  
EIF2AK4  
SART3  
OR7E117P  
UGT1A2P  
HSPA9P1  
FAM110A  
MIR6876  
PLEKHA2  
ISCA1P4  
SPIRE2  
MMP1  
RPA4  
FBXL13  
AC011352.3  
AC073913.2  
DMBT1  
RNY3P12  
LINC00326  
HASPIN

---



---

UBA52P7  
TSC22D1  
TBC1D3H  
ZFPM2  
AC009927.1  
CCL20  
TOP1MT  
DPF2  
AC098476.1  
CAMK2G  
AP005057.1  
SOCS5P4  
CDK2AP2  
BOK  
C1GALT1C1  
TGM4  
IFI35  
PAN3  
MRPL47  
INPP5A  
AL118558.2  
FDPS  
MICALL2  
CST2  
AC034206.1  
MIR1278  
CAVIN4  
RNU6-752P  
IFIT5  
SMIM3  
AC117498.3  
AC009093.3  
MUC12  
GAPDHP26  
TFCP2  
AL359075.1  
LINC01220  
MT-TW  
RN7SL154P  
NRG3  
AC007106.1  
MRPS30  
WDR45B  
AC087276.2

---

---

ATXN7L1  
MED15  
AP003062.1  
FAM72D  
PPIAL4A  
LINC01844  
AC100839.1  
ANKUB1  
ZDHHC6  
AL034349.1  
GAPDHP72  
AC002525.1  
RF00156  
AC136475.10  
MRPL13  
AC092112.1  
SPC24  
PCMTD1  
TUG1  
ACTG1P19  
TRMT1L  
AC139720.1  
TMC6  
ANXA7  
AJ271736.1  
PCDHGA8  
AC115618.2  
ADNP2  
RN7SL15P  
ZYG  
IQCB2P  
MIR6730  
RCC2P1  
SMAD1  
COMMD7  
RN7SL263P  
AL450322.2  
MATR3  
SNAPC3  
AC027313.1  
AL451164.2  
AL442125.2  
CHAF1A  
CASP1P1

---

---

FHDC1  
AC140479.1  
RNA5SP197  
AL008638.3  
KCNMB2-AS1  
FBXW11P1  
SULT1C2  
FAM168A  
NR2F1-AS1  
NBPF15  
MPPE1  
TFB2M  
AC084757.1  
TM4SF20  
SNX18P10  
UBE2D2  
AC244033.1  
RN7SL541P  
AP2M1  
FBXL19  
AL353593.2  
AL031726.1  
MIR4645  
FAM221A  
XKR5  
AC104389.4  
GPR132  
CHEK2  
AL359880.1  
AC008456.1  
PDCL2  
MMP3  
GIMAP2  
PUF60  
HMGCS2  
PRELID3BP4  
NCOA4  
HECW1  
CBLL1  
AC104819.1  
SLC16A13  
HMGB1P20  
AC093281.2  
AC135050.5

---

---

RN7SL204P  
ZNF280C  
KHDC4  
AL512356.1  
AC009132.1  
NEBL  
CCDC14  
BLM  
NCBP1  
C9orf152  
TMEM45A  
C15orf62  
WFDC11  
AL445647.1  
RBM45  
APBB2  
AC021678.1  
NIP7P2  
APCDD1L  
LINC02416  
RAB5C  
ANKRD13C  
AC026117.1  
NTAN1P1  
SNRPCP16  
PALLD  
RNU6-296P  
NAT1  
AL590139.1  
AC005261.4  
AC015849.5  
USP3  
ING1  
AC093117.1  
ROBO2P1  
RF02132  
AL358934.1  
AC114814.2  
MIR4536-2  
NCOR1P2  
AL078595.3  
NDUFS5P1  
ZNF134  
STARD4

---

---

CDC123  
PIGV  
DGAT1  
ODAPH  
CEP152  
AC027808.1  
CTSB  
HINT1P2  
PHBP16  
SMIM14  
ANKRD12  
CDC42EP3  
OR7E102P  
AC069200.1  
EIF4A3  
KAT6A  
AC108479.2  
RF01974  
PCDHB10  
SCARNA6  
TREM1  
AC027031.2  
RPS27AP17  
POLR2H  
OR5E1P  
TMEM179B  
MDM2  
AL391903.1  
MTAP  
MED30  
TMBIM7P  
SRSF3  
DEGS1  
AC099482.1  
VPS36  
PIGHP1  
AC120042.1  
LINC00858  
LRRC3  
RPL22P11  
ACTR10  
AC093844.1  
ARL14EPL  
MAP7D1

---

---

CDK14  
ZNF738  
AP000526.1  
AC079466.1  
Z83851.1  
AC138028.2  
AC008403.1  
AL449363.1  
Z98752.3  
H2BFS  
MRPS5  
SNORD82  
NT5C1B  
AL929236.1  
PHKA1  
MIR6749  
FAM192BP  
ITPKA  
AP001029.3  
OR7E91P  
SLAMF9  
RANBP10  
AL445531.1  
HIST1H4E  
MYSM1  
RNU6ATAC12P  
RNU6-586P  
MTND4P28  
AC024224.1  
AC007274.3  
LINC02472  
AP001978.1  
AL137190.1  
AC006987.4  
AC112498.1  
RPL12P3  
FNIP2  
AEBP1  
CEACAM18  
MYOSLID  
ZNF311  
BRPF3  
KIRREL1  
RASAL2-AS1

---

---

RPL37P18  
LRRK1  
ARMCX5  
PATE1  
VCPKMT  
AC013652.2  
HMGB1P22  
ZNF507  
UBA52P8  
AC078778.2  
KRT18P7  
MGAT5  
PIN4P1  
KRT84  
SAMD13  
OSTCP2  
TMEM214  
MRPS16P3  
AP001453.2  
FKBP10  
CCDC70  
ZNF7  
APOBEC3C  
AL354766.2  
MNS1  
USP8  
MED13  
AC040169.3  
RPRD2  
RNU6-1048P  
LCMT1-AS2  
DDX59  
CCDC190  
AC004835.1  
FSTL1  
FOXP1  
COX6B1P6  
AL133412.1  
HNRNPA3P10  
TET1  
FAM86HP  
AHCY  
KRT18P42  
SPACA4

---

---

ZNF283  
AC010834.3  
MIR6829  
EIF3B  
BRPF1  
KCND2  
AP000866.3  
OMP  
ARHGAP29  
MYL12BP2  
C11orf42  
ZNF669  
MSC-AS1  
AL109933.2  
AC012363.1  
AP001486.3  
AC108463.3  
TFCP2L1  
RAP1AP  
AP003390.2  
AC022858.1  
AL390719.1  
ZMYM6  
BTN2A1  
ARHGEF35  
AC007599.2  
ATG5  
RPS10-NUDT3  
AGO4  
AC245100.5  
ARHGEF9-IT1  
AC024909.2  
AC019080.5  
GATA3  
LINC02298  
RPL17P11  
MYC  
EIF3E  
RCOR2  
OPN5  
ALG10B  
MAD2L1BP  
AC019227.1  
AC022150.2

---



---

DIS3L2  
AC002401.4  
SNORD6  
AC007547.1  
RPS26P49  
FGF23  
NCBP2-AS1  
TFE3  
FLJ16779  
AC243972.2  
RN7SL126P  
TEC  
ASS1P11  
AC092669.1  
AC069547.1  
C1orf43  
TUBBP2  
AC010522.1  
DNAJC22  
NOP14  
ZNF300  
AL021920.2  
AP000357.1  
SNX5  
SLC25A32  
AC009803.3  
AC024267.4  
LLPHP2  
ADAM12  
LINC00904  
NBAS  
AC090502.1  
BTNL10  
TMEM51-AS1  
HTRA3  
AIMP1  
LINC01561  
PURB  
OFD1P17  
ITSN1  
LETM2  
AC243919.1  
NRBP2  
TPRKB

---

---

AMFR  
FHOD3  
UBE2N  
TMEM248  
MIR331  
AC135586.1  
CYP26A1  
MYRF  
DDX18P1  
CCDC153  
CARD19  
LEMD3  
ATG9B  
CDC25B  
ARPP19  
AC044810.2  
AC092115.1  
TMEM183B  
AC010328.3  
MICC  
HYPM  
CYBRD1  
AL033523.1  
TINAG  
C6orf141  
MRGPRX3  
AC008109.1  
ATP6V0E1P1  
RSRC2  
USP46  
DOCK6  
MAP3K14-AS1  
PLEKHM3  
AL731563.2  
AC004486.1  
BRD7P2  
MBD5  
RPL36AP51  
MEPE  
TULP3  
AP000949.1  
AC048344.4  
SLC24A2  
LINC01556

---

---

LGALS9  
AC007992.2  
FEM1B  
AC117383.1  
GOLPH3  
NBPF10  
AF230666.1  
DNAJC9  
NUP153  
SYF2  
FHAD1  
SYT8  
AC007272.1  
AL596247.1  
LHX1-DT  
GOLGA2  
KRT8P33  
BPGM  
AC036222.1  
MSN  
JADE3  
SLC44A5  
NEPRO  
UTP20  
RNF114  
RNF123  
KDELRL1  
AC015802.1  
CTDSP1  
AC020915.1  
CHSY3  
RNU6-301P  
RN7SL255P  
TCF3  
PPP2R2DP1  
RNY4P17  
RPS20P33  
H2AFZ  
RNU6-766P  
AC073651.1  
DDAH1  
TXNIP  
CAPNS1  
AC239802.1

---

---

MTCO2P17  
LINC01399  
APOL2  
AL772337.1  
AC008700.1  
AL080285.1  
TWIST1  
UBE2CP2  
DHDH  
AC009269.5  
AL031717.1  
CYCSP39  
AC092821.2  
MAGOH  
AC009365.2  
RXFP4  
HOXB2  
TMEM150B  
ANKS1A  
KLHL18  
AC025154.2  
HSPA5  
CREB3L3  
CSNK1G1  
DTYMK  
HNRNPH3  
CLASP1  
NID2  
PSMC1P2  
AC093895.1  
AL445623.1  
RBBP4P2  
AC010642.1  
NFKB1  
LHX1  
BEST2  
PRPF38A  
HMGN1P11  
RPS3AP38  
RAB23  
AL121895.2  
CANT1  
AL596223.2  
APCDD1L-DT

---

---

RNU6-1206P  
TMCO1  
ELAVL1  
AC131971.1  
SAP18P3  
TENT2  
RNU6-1257P  
TMEM184B  
HIST2H2AA4  
RN7SL380P  
GJC2  
KRT9  
AL583808.1  
AC019155.3  
GDI2  
LINC01322  
MKLN1-AS  
SUCCO  
HMCN1  
AL445123.1  
HMGN2P22  
AC022613.3  
AL583722.4  
WDR72  
AL583832.1  
CALD1  
TBC1D12  
KLHL12  
MTND4LP14  
CHRNA5  
KRT89P  
CXorf49B  
GLB1L2  
SPCS2  
CHIC2  
LINC02280  
BNIP3L  
GABRP  
RNU5A-2P  
LINC01908  
AP001432.1  
TMPRSS11D  
NINJ2  
PHRF1

---

---

PUS10  
TNFRSF14-AS1  
CDK8P2  
WSB2  
AC073323.1  
TDGP1  
DAZAP2  
AC099313.1  
PRRC2A  
YBX1P1  
DNAJC21  
VPS72  
ZNF165  
LINC02121  
AC016027.5  
CLCA4  
CWF19L2  
ZNF616  
C20orf85  
MIR3122  
TMEM65  
MARS  
MIR4316  
MPV17  
CHAMP1  
KRT8P21  
C19orf54  
PRSS33  
NFKB2  
NPM1P39  
AL772337.3  
ZNF613  
RAPGEF2  
PTGER2  
AC005237.2  
AC007842.1  
MYH15  
CYCSP44  
CHD9  
SUMO2P4  
AL590428.1  
HNRNPUL2  
HAUS6P1  
KRT18P1

---

---

DNAH14  
FANK1  
ARMC8  
UBXN2A  
SNORD46  
CCDC115  
CIAO1  
LINC00942  
LNPEP  
FAR1P1  
TACC3  
AL591178.1  
AC002401.1  
USP38  
AC084117.1  
CD177  
AC080023.1  
LINC02085  
FAM189B  
AL513327.1  
AP006621.4  
KRT8P1  
MIR1255A  
CCDC58  
SNX8  
HNRNPKP1  
SPDYA  
PRKCA  
AC016746.1  
SNHG4  
MTCO2P15  
RN7SL748P  
NFKBIB  
AC079776.1  
ACTG1  
VPS8  
ANAPC10  
EIF3FP3  
ATP1A1  
AC023934.1  
AREL1  
AC099520.1  
TMEM200A  
MIR4252

---

---

PPIAP11  
LRRC37A9P  
RAB14  
VAMP7  
PRIM1  
AC020891.1  
KRT4  
PITRM1  
TIA1  
TMEM9B  
MFSD2B  
FABP6  
GRK2  
AC108865.1  
PSRC1  
COPS8  
OR7E62P  
EPN3  
KIAA1671  
PLA2G2F  
LOXL3  
LINC01348  
AL604028.2  
MX1  
PLCXD1  
FP671120.1  
ZBED4  
SHB  
AL731571.1  
ZNF861P  
PRRX1  
LRBA  
AL645939.3  
LINC00456  
PDE11A  
LINC01940  
RNU6-1102P  
MTATP6P29  
MIR31  
GCA  
ZBTB2  
RNU6ATAC16P  
C4orf33  
SLC8B1

---



---

CACNG6  
RABIF  
B4GALT2  
MIR593  
AL389895.1  
SORL1  
AC011611.3  
VPS29  
RPL17P50  
MTX1  
APOL5  
AC105219.1  
AC012531.4  
NFATC3  
WNT5B  
ARL5A  
MIR4421  
MFHAS1  
TLR3  
PPIAP51  
AD000813.1  
SPATA5L1  
SNORD19  
ZC3H13  
RPTN  
AC096741.1  
SLC26A8  
BLOC1S4  
AL078621.1  
PNPT1P1  
LEMD1-AS1  
MIR7856  
AMER1  
OR4A47  
CD70  
KRTCAP3  
SPARC  
SETD6P1  
FRG2HP  
MIR3133  
SLPI  
ENKUR  
BCL6  
SERBP1P5

---

---

SNORA3C  
FAM98A  
RAB8B  
ZNF385C  
FLJ31356  
FAM3D  
GTF2IP7  
RNU6-677P  
AC002472.1  
LYPD2  
AL442647.1  
AC098613.1  
PPP1CA  
TNFAIP8  
POR  
RBM4  
AAGAB  
RPS6P8  
AFTPH  
AL512504.1  
FCHO1  
NANP  
TRA2B  
FLNC-AS1  
ZNF608  
C6orf99  
MIPEP  
DLX5  
SERPINB3  
ZNF761  
ADGRF2  
UBE3B  
KRT18P39  
FAM83G  
TPI1P3  
SSR3  
SMIM36  
AL512288.2  
FP236315.2  
OR7E33P  
DYNC2H1  
SAR1A  
CDYL2  
UBE2V1P9

---

---

CLIC4P1  
LINC00518  
SFRP2  
RNU6-308P  
PSMB10  
SNRPEP10  
IYD  
UTP14C  
AC008781.3  
PARGP1  
SPAG9  
AC009271.1  
AC083801.2  
SUPT20H  
MIR4742  
PTPN23  
LINC01929  
BX470102.1  
RPL34P22  
AC008982.1  
PSD4  
PPP2R2C  
AC073964.1  
EPB41  
RNU6-276P  
FERP1  
TESMIN  
MAGEA10-MAGEA5  
RNU6-155P  
AP1S1  
ZNF229  
RNF219  
LINC02408  
MIR570  
RNA5SP82  
AC106738.2  
RNY1P7  
PRODH  
AC110760.1  
ATAD5  
UBE2V1P2  
AC112482.1  
FNDC3CP  
AC106798.1

---

---

AC018804.1  
AC007536.1  
ZNF552  
AC092868.1  
Z99289.1  
AC008687.5  
SKA2P1  
HMGB3P2  
SPINK5  
GAPDHP67  
ZKSCAN5  
CFAP20  
SIAE  
SPACA6P-AS  
KIAA0040  
AC092803.1  
RNF10P1  
B3GALT5-AS1  
TCAF1P1  
AC138409.2  
PABPC1P2  
AC107016.1  
ADO  
EEA1  
GATA4  
RSL24D1P6  
PRDM1  
AL591178.2  
LINC01981  
PCDHB13  
SLC30A5  
E2F3P2  
AC005537.1  
MED13L  
CUL5  
ENPP7P7  
PIEZO2  
AC087761.1  
CALM2P3  
LINC01605  
SLC25A15  
TTC6  
RPS26P52  
SH3BP1

---

---

IGFL2  
BIRC6-AS2  
AC068134.2  
RPL29P19  
ATXN2  
NR1D2  
RF00569  
HSPA1B  
AGPAT1  
TIMMDC1  
ADAMTS7  
AL031714.1  
RNU4-24P  
AC108751.4  
FAM133B  
AC009108.4  
ESPNP  
AC087667.1  
AC092892.1  
RPL5P2  
AC009075.2  
ARHGAP8  
GRID2IP  
TRIM8  
EAPP  
ALG3  
MIR5588  
AL031736.2  
C11orf91  
AP1M2  
SNX13  
AC093904.2  
AC073585.1  
RNU6-510P  
TAS2R60  
AC121757.1  
AL353593.3  
MIR4286  
TUBGCP4  
RGS16  
TMEM158  
LINC01941  
CENPW  
AC116347.1

---

---

VPS13D  
RIC8A  
APELA  
HOXC6  
AL158801.2  
RPS6P7  
RANBP2  
PHKA1-AS1  
RPL39L  
SNX18  
AC008622.2  
OFCC1  
QRICH1  
LGALS3BP  
CASK-AS1  
AC004808.1  
GHITM  
AC040904.1  
TRPV5  
APEX2  
SRSF1  
AZI2  
USP2-AS1  
AKT2  
SERBP1P1  
CMIP  
HHAT  
LINC01592  
NUS1  
ASS1  
MFSD2A  
MRPS18A  
BIRC7  
MIR6728  
RN7SL473P  
DERL1  
MFSD10  
AC138123.2  
AL132656.3  
VN2R9P  
RNF26  
NRBP1  
RNU6-356P  
ZNF195

---

---

HIST1H2AJ  
RN7SL44P  
AC018641.1  
ADPRHL2  
RNA5SP124  
AC007529.1  
AC023078.7  
UST  
AC098592.1  
KIF13A  
RNU6-525P  
SETD2  
SLC38A6  
TIMM23  
AGR3  
AC023421.2  
FER1L6-AS1  
ASS1P10  
LINC02428  
DUOXA2  
DCAF5  
RPL29P28  
RNA5SP134  
GOLM1  
AL161935.2  
HGS  
ATP6V1D  
COX6B1P2  
LAMB2  
CARD14  
TPP2  
AC110619.1  
BUD31  
NIFKP9  
LRP1-AS  
AC023449.2  
AL035448.1  
AC008443.3  
NETO2  
RPS2P32  
RN7SL684P  
AC112187.2  
AC009302.1  
AC010333.2

---

---

VRK3  
LINC01096  
CARNMT1  
MRPL14  
CLTC  
ATP1B1P1  
PSORS1C2  
AC107072.2  
TMSB4XP8  
HAPLN3  
AC008906.1  
PKMP4  
ZNF214  
MTND4P15  
AC024940.1  
IQSEC2  
PMS2P1  
MUC5AC  
TMX2  
LDHAP1  
SLC14A1  
SPSB1  
LINC01915  
NUMA1  
LGR6  
SEPHS2  
AL365356.1  
XK  
AC025030.1  
CTSS  
M6PR  
TARS2  
RNA5SP505  
ACER3  
HIST1H4PS1  
MMP2  
LINC00524  
AP001020.2  
RPUSD4  
HEATR5B  
UBE2Q2P2  
FAM122C  
MAP2K3  
SMC1A

---



---

RNU6-45P  
AC010542.1  
AP000317.2  
HLA-K  
CACYBP  
AC004160.1  
AC005162.2  
HOXC4  
RRS1  
PIGG  
SNORD121A  
KLK5  
AC016877.2  
HTR7  
MAT2A  
LINC01722  
IFNAR1  
HMGB3P17  
SUCLG2P2  
MIR6745  
CWC27  
ITSN2  
LAMP3  
MMD  
MTREX  
LINC00337  
DBT  
ZMYM4  
NHS-AS1  
NPM1P27  
MIR193BHG  
ANP32A  
CICP12  
DSN1  
ISPD  
AC004817.3  
LINC02474  
MTCL1  
AC087645.2  
HS3ST5  
AL356124.1  
CRYZL2P  
HSBP1  
MEF2D

---

---

MIR2117HG  
RAB1C  
RPS7P9  
SWAP70  
VTI1B  
NUTM2A-AS1  
HMGCR  
AP3B1  
AC132872.4  
NPM1P32  
IARS  
MIR5009  
MIR3978  
AC083806.2  
KRT127P  
USP42  
CBX1P2  
ALG1L5P  
RGS17P1  
AC073592.10  
AC083843.2  
FER  
RELB  
IFITM9P  
PPM1N  
SFT2D1  
AC011998.3  
AC004691.1  
AC005741.1  
JKAMP  
AC020658.6  
PDPK1  
CFAP45  
AC079203.2  
MCM3  
AC108174.1  
BCL3  
GPR180  
PLCD1  
CHP2  
GLMP  
ZNF565  
CCNT1  
AC022164.1

---

---

SERPIN8  
AC093166.1  
ZNF670  
FER1L6-AS2  
VDAC1P10  
RNU1-30P  
ANXA4  
MTND2P26  
AC005041.2  
SNRPA1  
MYB  
MSH3  
IL20RB-AS1  
HIST1H1E  
AC097347.1  
AC134312.5  
AC245748.3  
SH3BGRL2  
AC124319.1  
GBF1  
MIR621  
AC007673.1  
AC066613.2  
AC011193.2  
CABLES2  
RN7SL68P  
AC011442.1  
MYO16-AS1  
DUS4L  
AC022395.1  
PPHLN1  
UBAC2  
AC099667.1  
MXRA8  
YY2  
HOXC11  
WDR82  
AC010595.1  
AATF  
KANSL1L  
AC007342.5  
RANP2  
SNORD67  
AC080128.1

---

---

GPR153  
RN7SL130P  
TMSB4XP3  
SERP1  
METTL4  
USP28  
NOA1  
ADM2  
KRT8P3  
HAUS6  
POU5F1  
SECISBP2L  
CHPT1  
AC000123.3  
AC099063.2  
UCN2  
AC012613.1  
RNF121  
RIPK4  
CEBPB  
LINC01224  
GAPDHP28  
DNMT1  
STX4  
LINC01123  
AC004870.3  
AC073130.2  
FGF11  
TRADD  
AC141586.4  
BMP8B  
RNF135  
TLR9  
LYSMD3  
BCOR  
AC079601.2  
AL354984.3  
BUB1B-PAK6  
HMGA1P3  
POLR1B  
LINCR-0001  
AC108463.2  
C15orf39  
ZFR

---

---

B4GALNT3  
TMEM30A  
POT1-AS1  
LINC01301  
RNF145  
DTX2P1  
AL450306.1  
C2orf27A  
RN7SKP223  
AP001208.2  
AC007992.1  
AL391058.1  
GDPD2  
KRT14  
SEC14L2  
RN7SL834P  
ZNF322  
AC122710.2  
GLMN  
INPP1  
NREP  
ATP10A  
SON  
AL049840.1  
GPR176  
ALG1L6P  
AC062037.2  
VDAC1P6  
AC106782.1  
HOXB13  
KIAA0391  
NDUFA5P4  
AL132656.4  
PACERR  
ZNF749  
THEG  
LYN  
PSMC1P1  
HSD17B6  
MYO7B  
LINC02189  
AKAP13  
AC084859.1  
MTMR1

---

---

AC027176.1  
AL355102.5  
OSBPL9  
SNORA16B  
PAQR8  
ACVR2A  
LACC1  
LINC01385  
ZIC5  
CORO1B  
AL031777.1  
DPP8  
RNU6-73P  
CLDN18  
PLCE1-AS2  
RN7SL589P  
SNRPG  
HECTD3  
AC114811.2  
AP2A1  
ST5  
Z97198.1  
ZNF292  
RNF10  
AKAP11  
SEC62  
AL031670.1  
PITRM1-AS1  
AC113423.2  
MAGEA8  
YRDC  
SVOPL  
AL121657.1  
THUMPD2  
NKX3-1  
ITFG1  
KRT18P16  
PCGF5  
RPIA  
MTCO3P29  
AJ239321.1  
AC133528.1  
AC060765.1  
ELK1

---

---

AL031708.1  
XRCC2  
RNASEH2A  
AKR1E2  
ADGRA3  
FOXF2  
DTX2P1-UPK3BP1-  
PMS2P11  
FUT6  
C16orf74  
PDPR  
CEP57  
AC091179.2  
SLC23A3  
CDK11B  
TMCO3  
AC005020.1  
AC011257.1  
LAP3  
ANO9  
NOC2L  
AP000842.3  
CHORDC1  
HSPE1P26  
AC005479.1  
PWWP2A  
PABPC1P10  
B3GALNT2  
ATF6  
AGL  
AC010325.1  
RARB  
RAB35  
PPM1B  
METTL7B  
AL139260.2  
C5orf34  
LUM  
AC007906.1  
AC006058.1  
FAM198B  
MOB3B  
AC092611.3  
ADAM28

---

---

MIR4427  
THUMPD1  
CACNB1  
ALG13-AS1  
NAP1L4  
AC004461.1  
AC007998.4  
AC233280.2  
AC009948.4  
TMSB4X  
EIF4E  
AC005255.1  
PLCH1  
AL109983.1  
BX322234.1  
WIF1  
PTAR1  
AL590627.1  
ICMT  
SCYL3  
TICAM1  
MTAPP2  
STAT2  
RN7SKP90  
PEX2  
AC006001.1  
SLC6A9  
SUSD1  
Z98257.1  
AL451142.1  
AC099518.2  
MIR205HG  
MCUR1  
USP7  
RNPS1P1  
AC015712.1  
ELK4  
AC073529.1  
DTWD2  
FGFR1OP2  
SYNJ2  
IFT52  
UMPS  
SETDB1

---



---

AC039056.2  
AL353150.1  
ARHGAP1  
CTPS1  
AL512605.1  
KMT2A  
TBRG4  
AC121154.1  
AC234782.4  
FANCE  
CFDP1  
LCN1P1  
AC244154.1  
SNTN  
AL583810.3  
CCT8  
PSME2  
MAB21L3  
BDP1  
AC110588.1  
NDRG1  
AC022819.1  
HMG20A  
AGTRAP  
LINC02320  
LINC01500  
AP001350.1  
EIF1AX-AS1  
VNN1  
AC018638.8  
GTF3C2-AS1  
MTATP6P15  
MYORG  
RF00264  
GMPR2  
MIR6740  
AC125611.3  
PIWIL4  
HSPE1P7  
RNU6-957P  
AC018714.1  
AC239584.1  
AC010261.1  
PHACTR2P1

---

---

ZNF823  
TARDBP  
TRPS1  
RASSF10  
AC012594.1  
BCLAF1P2  
RNU6-438P  
AC135279.1  
AC068631.1  
HSPE1P2  
KRBOX1  
NUDT15  
AC103957.1  
AC027801.3  
RNU6ATAC38P  
AC112721.2  
LPIN3  
DAW1  
ATP11C  
RNA5SP345  
C1orf174  
RNA5SP97  
DBNDD1  
AC104966.1  
AC125494.1  
AC007388.1  
AC116424.1  
MESTP1  
MIR210HG  
AC009093.4  
SLC9A7  
ST6GALNAC1  
AL358913.1  
RIMKLBP2  
FRMD8P1  
AC106037.2  
PDAP1  
UBR2  
AC005828.2  
AC007115.1  
CNTNAP3  
AC096751.1  
RNA5SP75  
MIR551A

---

---

AL592114.3  
AC132803.1  
AC092810.3  
ZNF687  
IFNGR1  
LINC02000  
PPP2R5D  
CLPX  
ADK  
HCAR2  
AL035661.1  
CLOCK  
NIPBL  
LINC02551  
RNA5SP450  
CEP295  
CCNJL  
KRT18P17  
MYPN  
AC005104.2  
AC005392.2  
AC013394.1  
STAC  
MARF1  
AC027228.2  
CCDC88A  
LINC01594  
PSME2P2  
SNORD13P1  
SLC9A6  
AL021578.1  
DPY19L1P1  
AL606490.2  
LIF  
COL4A1  
SETD7  
HIST3H2A  
RPS6KA2-IT1  
NME6  
WARS  
AL021807.1  
SERPINE1  
NUS1P3  
AC115522.1

---

---

AC006262.2  
POLK  
MRPL37  
SNX19  
ARHGAP5-AS1  
AL357033.3  
CDHR4  
PSORS1C3  
RPS29P16  
AC098848.1  
AL136084.2  
C3orf58  
AL596223.1  
RNU6-1255P  
CNTF  
LINC02560  
AL035420.2  
HMGN1P13  
GMCL1  
KDSR  
ZBTB12BP  
PRKAR2A  
LGALS9B  
FBN3  
CYP4F11  
C17orf53  
LINC01012  
GNE  
POLE3  
LYPLA1P2  
EDIL3  
HIBADH  
RARSP1  
AC009154.1  
PDGFRB  
CLDN6  
SETSIP  
DNAAF2  
ELOVL7  
MYO1D  
FNDC11  
AC010531.2  
FAM45BP  
AC098798.1

---

---

HEPHL1  
PDP2  
AC008870.5  
F2R  
SLC6A1  
ZMAT2  
PRKCD  
GREM1  
AC009084.1  
ANKRD9  
NLRP3P1  
PSMB3P2  
HMGN1P30  
AL023284.2  
AC078860.1  
HIST2H2BD  
ABRAXAS2  
ARNT  
KRT87P  
LINC00525  
HEXIM1  
HMGN1P8  
BMP1  
AC079684.1  
SIGLEC15  
SEPT10P1  
RBBP5  
OR10H1  
PRSS23  
ABCB7  
RUSC1  
UBE2V1P1  
CHTF8  
GPR107  
LINC00880  
AC005336.1  
BID  
DDA1  
GUCY1B2  
UVRAG  
RNU7-45P  
AKR1B10  
ANKRD40  
AP003500.1

---

---

KCNA7  
ANKRD26P4  
BOLA3P2  
FAM208A  
EIF4E2  
UBLCP1  
AL133371.1  
FGD5-AS1  
PCNA  
ZFPL1  
LEF1  
TOR1AIP2  
RTN4R  
RALY  
TUBBP10  
TATDN2P2  
EIF2S3B  
AC118345.1  
AC011333.1  
AC073150.1  
AL031666.2  
IL10RB  
ALG1L2  
HNRNPA3P3  
DCLRE1C  
PVT1  
SLC4A7  
AC017101.1  
RBAK  
IFITM10  
BSDC1  
SRSF9  
POMK  
ZNF567  
PPIH  
KCTD14  
CKS1BP3  
RN7SL452P  
RASSF6  
NR2C1  
LINC01691  
AC136475.3  
MICA  
SMG7-AS1

---

---

AL132671.1  
CLCN1  
CCNT2  
LINC01792  
SETP22  
AC112484.2  
KRT8P39  
LINC02122  
PROSER2  
CEP170P1  
SSH1  
MIR572  
MIR5188  
CENPH  
AC004870.2  
AC145285.4  
MN1  
MOGAT3  
KCTD21  
LINC02253  
RPEP6  
AP003123.1  
RNU6-783P  
RNU6-1307P  
RN7SL703P  
RN7SL379P  
SNORD74B  
MIR6078  
AC093722.1  
MTND6P2  
OR4A41P  
WWTR1  
SUMO1P4  
RNU6-1098P  
RNU6-100P  
EPHB2  
CHSY1  
TOMM70  
ZNF792  
EMP2  
GSS  
ATP5BPB7  
NDUFAB1P1  
LTBP2

---

---

TMEM237  
CIR1  
HIGD1AP1  
HNRNPA3P6  
AL035413.2  
KRT81  
PALM2-AKAP2  
OR7E136P  
AL033384.2  
TNPO1  
RTP2  
SF3B4  
SSPN  
AL035411.1  
CLIP2  
LINC01764  
NOD2  
MIA-RAB4B  
HSF2BP  
AC099782.1  
RMDN3  
AL353583.1  
DNM1P17  
RIPOR1  
G6PD  
UTP11  
MIR6810  
KRT6C  
HS3ST3A1  
HIST1H2AM  
AC091212.1  
AL590240.3  
LINC02300  
TNFAIP1  
AC023043.2  
RPS27AP10  
KMT5B  
AC092919.2  
HPS5  
AP001453.3  
ZNF160  
PRDX3P1  
BTBD1  
HIST1H3E

---



---

MMP7  
CMTM4  
AC114402.1  
CTBS  
SBF2-AS1  
OR51F5P  
VDAC1P5  
EBLN2  
PXDN  
AL133399.1  
L2HGDH  
ARSH  
AC084026.3  
TASP1  
POLG  
USP25  
CLEC16A  
LAMTOR3P2  
UBBP5  
AC098828.1  
MIR595  
CCDC82  
SPATA20P1  
LINC01524  
SDCBPP1  
CCAT2  
DUSP4  
RBM12B-AS1  
LY6D  
MIR4435-2  
UBL4A  
SLC5A6  
MGAT4EP  
AC007098.2  
CENPO  
TMEM171  
RNA5SP37  
AC243772.2  
MTRF1LP2  
DGAT2  
SQOR  
AL121790.1  
AC004080.2  
RNU6-927P

---

---

MYO3B  
AL589743.4  
NAPRT  
ZDHC18  
AC106037.1  
AOC1  
TMEM200B  
RAD50  
PRTFDC1  
TMEM38A  
ANKRD40CL  
AP000919.1  
CXCL10  
CDH17  
ADAMTS2  
AL078644.1  
VSTM2L  
UHRF1BP1  
NOP10  
AC078883.2  
NPTX1  
PDPN  
SFMBT1  
NCCRP1  
TVP23B  
YPEL5  
AC117422.1  
HIPK3  
RNA5SP156  
ADRA1B  
BICDL2  
MIR4258  
VHL  
ZBTB44  
ZNF697  
PPP2R5A  
PIP5KL1  
AL118506.1  
TMEM185A  
FANCF  
AC068647.2  
KRT8P18  
RPL7AP2  
AC090525.2

---

---

L34079.3  
FLNA  
CDK8  
AC007991.2  
ITGA5  
KDM1B  
AC239804.2  
EIF3H  
AC093525.4  
MIR1254-1  
URB2  
CREBZF  
CASP14  
CNEP1R1  
MEST  
AC239803.1  
LGALS17A  
WWP2  
IL32  
SAP30L-AS1  
CALHM3  
LINC01967  
AC068790.9  
DUOXA1  
SH3PXD2B  
TMEM181  
NAMPTP1  
SNORD53B  
PSMA7  
TM6SF2  
BLVRB  
HNRNPABP1  
LINC01356  
AC013652.1  
AP005432.1  
CFAP300  
MTND5P1  
AC105020.1  
MMGT1  
AC112236.1  
CMBL  
LANCL1  
DFFA  
INO80

---

---

AL109954.2  
AL158827.2  
MSH6  
PLA2G3  
AC010551.1  
NOTCH2NLA  
OR1Q1  
FEZF1  
TMEM167A  
RNU6-876P  
NVL  
KLHL6-AS1  
PGM1  
APP  
AC244517.10  
AC130456.7  
S100A11P1  
FAM198B-AS1  
CCDC91  
CFLAR-AS1  
GATAD1  
UBE2D3P2  
RPL23AP55  
NUDT4  
KIR3DL3  
MFAP3  
CLDND1  
AC078819.1  
USP15  
KCNE3  
SLC29A3  
POMP  
CHD4  
HSP90AB3P  
AL513485.1  
IREB2  
PCSK9  
RPS29P12  
HCG4B  
AKAP1  
LARP1B  
PAPOLA  
ZSCAN32  
CYP2W1

---

---

ATF7IP  
C4orf19  
CCT3  
RNU2-16P  
TRIM47  
GPRC5D  
SLC25A37  
AP000879.2  
AC245100.2  
STX19  
CEP104  
INTS7  
LINC01186  
ZNF184  
ICAM5  
MIR1293  
PLBD1-AS1  
TP53BP1  
AC138938.1  
ANKRD18A  
EME1  
GNG5  
AC007639.1  
EIF4EBP2  
AC093909.1  
CD276  
PNRC2P1  
AC103681.1  
KPNA2  
BECN1  
AC137579.1  
LINC00165  
NPBWR1  
TRAIP  
TRIM11  
RAB18  
AL022238.2  
KRR1  
GALNT12  
KALRN  
PLA2G4A  
AC009486.1  
ZNF239  
NID1

---

---

NSDHL  
LINC01907  
H2AFY  
BRD7  
CLTB  
KRT8P5  
AC025539.1  
ZNF410  
UGGT2  
KCTD3  
ABCC11  
BAZ1B  
PELO  
RNPS1  
SPAG17  
TUBGCP3  
DSP  
AC011747.1  
MSL1  
TWF2  
AC008781.2  
MRPL9  
HDAC1P1  
HSPA1A  
RASSF9  
LINC02262  
TRIQK  
PUDP  
NUDT19P5  
KRT8P41  
ACTBP7  
AL391121.1  
PSMD5  
CDC25A  
LRFN4  
MSANTD3-TMEFF1  
AC010378.1  
RNA5SP462  
AC024592.2  
MYO1C  
Z98884.2  
LINC00592  
AC092757.2  
AP003355.1

---

---

AC108010.1  
MIR548AA1  
TRIP6  
MCRIP2P1  
ADORA2B  
MOGS  
TRPV3  
CTR9  
HMGB1P11  
ACTRT3  
AP005136.2  
EIF4EP3  
SNRPCP19  
HPRT1  
AC007342.4  
EMSY  
LINC00222  
PTK7  
SRRM2  
AC007996.1  
LINC00482  
C7orf69  
RNU7-46P  
AC067956.1  
VIPAS39  
TC2N  
SOCS5P3  
HSPA4  
PHETA1  
AC007382.1  
AC004846.1  
AC245884.3  
SKP2  
VPS26C  
PNPLA8  
ZBTB33  
KRTAP4-17P  
CD200R1L  
YBX3  
AC089983.1  
TONSL-AS1  
SPECC1  
CTNNBIP1  
PRPF18

---

---

AC092070.2  
DIO2  
HNRNPA3P12  
AP000873.3  
C8orf33  
AC013410.1  
DUOX2  
PCDHGA10  
SUV39H2  
PRKD2  
MIR6753  
DHCR7  
AC010976.1  
AC099314.1  
PCDHGC3  
AL772284.1  
HIST1H2BG  
LINC01910  
PTCSC3  
GORAB  
CXCL5  
VPS50  
AC110373.1  
AC027119.1  
EMP3  
AL355076.1  
RPS3AP53  
CAMK2D  
SHISA2  
AK3P5  
PEX11B  
ZNF750  
SLC39A2  
POT1  
AP001207.3  
FMO9P  
DCTN1  
AC021192.1  
CSNK2A3  
AC090023.1  
STX17  
BLCAP  
MARVELD1  
MAPK8

---



---

MUC3A  
TXNDC12  
GNAQP1  
CDCA3  
ECE1  
KCCAT333  
LRP8  
CKS1BP7  
HMGB3P31  
AL121895.1  
UCK2  
KRIT1  
ZNF251  
ANKRD17  
PHLDA3  
HOXA-AS3  
NEK11  
RN7SL12P  
CREBBP  
AP000560.1  
AC092104.1  
RHOA-IT1  
ACTG1P20  
PRR12  
AC004987.2  
PPP4R3A  
ANKRD18CP  
OSTC  
SEMG1  
AC108861.1  
AGMAT  
EYA2  
ASPHD2  
TPRG1L  
KATNBL1P6  
GGNBP2  
BAALC-AS1  
PTBP1P  
CCT7P1  
MME  
AC090954.1  
KLHL2P1  
AC092338.2  
POLR1A

---

---

U2AF2  
FBN1  
LDAH  
FRS2  
USP32  
HMGN1P7  
ZFP36L2  
POFUT1  
MED4-AS1  
UGT1A3  
MICB  
LARS2  
ZFAS1  
ZMYND8  
AC013714.1  
LEO1  
AC007215.1  
PDE4C  
AC010531.3  
SEMA4C  
AF127577.3  
ACTBP11  
DPH2  
AC090114.3  
MMS22L  
AC138393.3  
TRIP4  
AC092168.2  
AC096536.2  
ZNF320  
AC073107.1  
URB1  
ACKR4  
CDC14B  
SETP14  
ERN2  
DNAJB6  
DSTNP2  
AC093582.1  
AC093865.1  
LINC00964  
RBMV2KP  
AP001363.1  
MTF2

---

---

ABCC13  
CS  
AL138789.1  
RHOBTB1  
AC024085.1  
MEMO1  
ACTBP2  
MAP7  
TMED10  
AC012645.4  
AL360014.1  
FOXH1  
DCP2  
IFI44L  
RDH13  
MED8  
MATN3  
SP110  
COPS7B  
RANBP9  
AL033384.1  
PDCD5P2  
AC092851.1  
PA2G4  
TNFAIP2  
AC104134.1  
AC132008.2  
ATG7  
ESM1  
ZNF484  
MARVELD2  
AC138028.6  
AC015923.1  
AC016866.3  
FAM111A-DT  
WASF4P  
DYNLL1  
PPIL1  
PAICSP4  
ARID2  
DHFR  
AKIRIN1  
PPP1R14BP3  
USP33

---

---

AL512363.1  
DACT1  
SOX30  
AC007279.1  
CDC42P6  
ANKRD1  
PYGL  
PLA2G4F  
RNA5SP151  
AF230666.2  
RNF24  
BTBD8  
REG4  
CDHR5  
IFNWP19  
GAPDHP65  
AP001000.1  
SPIN1  
HYAL4  
AC008649.2  
SC5D  
BOD1L1  
ARL6IP5  
AC108724.1  
SLC37A1  
AC022336.3  
RNU6-704P  
LINC02561  
ODF2L  
DDX52  
ARL4A  
VDAC1P1  
PPIC  
TMEM131  
TMEM256P1  
AL355102.2  
YIPF6  
ISG15  
NFRKB  
FKTN  
LINC00343  
IGF2R  
AC004466.3  
OR7E7P

---

---

RN7SL815P  
YWHAQ  
HOXA5  
ANXA11  
AC009262.1  
CGGBP1  
AC090709.1  
ABCB9  
HECA  
MAP3K6  
AP003068.2  
PPP1R2P6  
TMEM26  
MORF4L1P1  
MICE  
RGS20  
IGF2BP2-AS1  
AC068299.1  
MTND4P23  
LRIG3  
VAMP8  
FXVD5  
SDR42E1  
RN7SL568P  
TTI1  
MIR633  
PCSK7  
AP001542.1  
MIR4802  
SMG5  
LARS  
LINC02432  
TERF1  
H2BFWT  
AL034546.1  
C7orf61  
ATP8B3  
TNFRSF1A  
AC004923.4  
AC138028.4  
OGDH  
AC068473.4  
IBTK  
NOG

---

---

PROM1  
AC005726.2  
AP000474.1  
NAALADL2-AS3  
AC091806.1  
GASAL1  
NRIP3  
AC109460.2  
LINC02411  
PLA2G4D  
KISS1  
OR51C1P  
U62317.1  
SPG21  
UBE3A  
GJA9-MYCBP  
ARL6IP1P2  
MC5R  
AP001434.1  
AC012501.1  
ODCP  
SPPL2A  
AC010768.2  
ID1  
DDIT4  
RNU1-16P  
CHD8  
TGFBR2  
ARL13B  
GTDC1  
AQP6  
MEX3A  
SYNCRIP  
HSPD1P3  
MDK  
AP4E1  
FAM91A3P  
NONO  
NDUFB3  
TMCO4  
AL136221.1  
RPL7AP52  
SNIP1  
MTND5P28

---

---

CRYM-AS1  
AC107959.3  
SLC9A4  
PPCS  
PRM3  
MIR5689HG  
SUPT5H  
RPL10P13  
LINC02019  
CXCL16  
C6orf15  
AC004551.1  
HNRNPA1P73  
NUP62  
P3H2  
RF00593  
TYW1  
MAST2  
UPF2  
ST8SIA6  
AC091133.4  
DDX58  
TRIM56  
MAML1  
SLC22A20P  
THAP9-AS1  
MARS2  
HENMT1  
HMG1P36  
ELOC  
DVL1  
APOBEC1  
HSF1  
RC3H2  
SULT1E1  
GPR161  
LYST-AS1  
MOV10  
GOPC  
AC007533.1  
PCDHGB1  
RNU6-1175P  
MFAP2  
STK4

---

---

AC025183.2  
LTN1  
AL049747.1  
TPM1  
PGRMC1  
SLC38A9  
AC069499.1  
SELENOT  
MTND5P30  
ZNF526  
AL139407.1  
AC012615.4  
NECAP1P1  
AP002761.1  
SMIM31  
CSTL1  
RAB12  
ZCCHC9  
AC021106.3  
MAPK1  
MLLT10  
LMCD1-AS1  
EFNA1  
HIST1H2BE  
ISPD-AS1  
DBNDD2  
AL121753.1  
TMEM106A  
YWHAZP7  
USP43  
SPOCD1  
CNPPD1  
AC079804.1  
AL365356.4  
LINC02029  
RBL2  
PTPN2  
AP001020.3  
RNU6-702P  
FAM111A  
AC019072.1  
STK17A  
AC106782.2  
AP000275.2

---



---

MBOAT7  
UBTD2  
TNFSF10  
BRIX1  
SLC2A12  
SERPINB9  
IGFL3  
PHACTR3  
AL645939.2  
PLEKHG1  
MAP3K1  
MIR181A1HG  
HMGB2  
AP002414.1  
AC011411.1  
RPSAP13  
FMNL2  
AC108516.2  
PCED1B  
KDF1  
MIR365A  
AL365181.2  
ATP6V1C1  
PPP6R3  
MAN2A1  
NTN4  
FAP  
SVIL  
AL079303.1  
PDCD11  
LINC02542  
GNPTAB  
GLO1  
TM9SF2  
AC113191.1  
SMC3  
AC079416.3  
RNU7-48P  
ILDR1  
ARMC9  
AC021127.1  
RNA5SP219  
CCRL2  
MBIP

---

---

GTPBP1  
PRB3  
ICAM1  
ARRDC3  
TNFRSF10D  
SYT12  
HNRNPH2  
OR2A7  
AL035405.1  
TBC1D3G  
RPL17P10  
BEND3P3  
FAM192A  
SUGCT  
GALNT4  
LRRRC15  
RNF13  
RPL9P28  
FEZF1-AS1  
COA7  
SAMMSON  
MFGE8  
AC007218.1  
ZNF32-AS3  
UGCG  
HMGXB3  
UTP23  
ARHGEF16  
AC005863.1  
ERCC3  
CDC23  
SP6  
EVI5  
PLP2  
C6orf222  
AC093525.9  
AL359922.2  
SLC2A3  
DNPEP  
LIMS1-AS1  
BMS1P7  
SLC36A1  
AC023794.5  
SALL4P7

---

---

AL590006.1  
PHF3  
HNRNPAB  
RNU6-668P  
PFN1P4  
CFLAR  
CRYZ  
OSTF1  
SNX9  
ZFHX3  
ANOS1  
DEDD  
RNA5SP295  
RN7SKP281  
GNAQ  
CRLF3  
EEPD1  
CUL2  
RNU6-693P  
GPR137B  
AC007001.1  
AC090673.1  
MTPAP  
AC007342.8  
NKAPD1  
HARS2  
DUXAP8  
CBLB  
KREMEN2  
ZP3  
DHFRP1  
ENOPH1  
HEPH  
PLEKHA6  
AC004832.2  
DUOX1  
AC010533.1  
AC006058.4  
TLE3  
AC007450.3  
CP  
ADH5  
UAP1  
AC112721.1

---

---

AC132192.1  
MAPK1IP1L  
CHD2  
ATP6V1A  
WISP1  
AC135068.5  
MIR3686  
AC008695.1  
RF02118  
IMPACT  
ERLIN2  
ZNF528  
CLIP4  
RAB1B  
FAM206A  
PDIA3P1  
CMAS  
VRK1  
C11orf44  
MIR4470  
AC008760.1  
EIF4HP1  
GTF3AP2  
TOR1B  
JPH1  
ZMYND10-AS1  
PLEKHF2  
AC023818.1  
AIFM2  
AC126124.2  
CD59  
TMEM63A  
FBXO22  
FUBP3  
USP34  
PADI3  
TRIM44  
AP003119.3  
SLC4A1AP  
TSEN15  
SMCO2  
CDKN1A  
SLC6A14  
CRYZP1

---

---

THADA  
FBXO3  
OR7E1P  
TRIM7  
AC073610.3  
AL663058.1  
ANKRD18B  
PPIAP57  
PPIL4  
CASC11  
AL592156.1  
WNK1  
SP7  
AC055811.4  
CCP110  
NBR1  
RF00432  
CATSPER2P1  
SMPD4  
WWC2  
PSMD13  
UBAP1  
CDC45  
ISM1  
CCDC186  
TP53I3  
PACSIN3  
LINC02051  
AL645608.8  
DBR1  
AP001318.1  
TNK2  
OR7E128P  
ATE1  
CASP3  
GANC  
AC020916.2  
MIR31HG  
LAP3P2  
ZNF766  
LIPM  
LINC00519  
ZNF322P1  
HNRNPA3P9

---

---

SEPT9  
FAM83C  
GRPEL2  
ZCCHC4  
LUZP2  
AC007494.1  
KIDINS220  
TMEM54  
RHPN1-AS1  
AL121603.2  
ARFGAP3  
ALMS1  
OPTC  
SHOC2  
VSIG2  
CDK13  
RPL7P14  
TBX18  
PTHLH  
ECEL1P1  
OR2W6P  
AC036103.1  
RNA5SP29  
GGCT  
RNF31  
SMIM35  
IFI44  
EDC4  
GNPAT  
PPP1R14B  
ACOT7  
AC007899.1  
RN7SKP266  
DENND4C  
VIL1  
WISP3  
CALB2  
AC062020.1  
AC108134.1  
SNRPD1  
RNF139  
KRT16  
TMEM92-AS1  
WDR53

---

---

JAK1  
CAMSAP1  
AC092687.3  
SLFN13  
WASHC4  
IL1RAPL2  
AC015712.6  
MTF1  
HBEGF  
MAP1LC3B  
AC243960.5  
NOX4  
LINC01169  
BCORL1  
ZNF816-ZNF321P  
SRSF7  
KCP  
RNU4-85P  
BIK  
NAMPT  
AC009154.2  
PPIA  
SLC4A11  
AC025576.2  
PLA2G15  
CARD18  
PDLIM7  
MIR3679  
CA12  
HAS2-AS1  
EEF1E1P1  
RNF11  
RSU1  
TRABD2A  
TTF2  
DNAJC14  
AP000542.1  
KRT18P33  
FNDC1  
MFN2  
ARMT1  
STK17B  
RPN2  
HUS1

---

---

ANXA5  
FOXL2NB  
SHMT2  
TDRD7  
ULBP3  
PPP4C  
KLHL23  
CCDC148  
MIR138-1  
ATXN7L3  
ATG12  
AC027088.3  
CEP192  
SCDP1  
ZNF649  
KYAT3  
CST1  
AC124276.1  
AC003006.1  
MIA  
PHKA1P1  
PLCXD2-AS1  
XPOTP1  
ATP1B3-AS1  
RASAL1  
GSDMC  
EIF3J  
KLHL21  
RNU6-282P  
TMPRSS3  
MFSD14A  
AC068580.4  
SRP72  
PPP6R1  
HHIP-AS1  
AL355388.1  
AL583722.3  
MMP13  
RAP1A  
TAF1  
PCDHGA9  
PARD3  
SPG11  
MIR6870

---



---

AL663070.1  
LIPK  
ADAM15  
AC092756.1  
PHF20  
AL591806.2  
RN7SL192P  
LINC02450  
RNF4  
TBILA  
RNU1-91P  
AL512656.1  
AC124067.3  
BRI3  
IFNWP2  
NABP1  
AP000974.1  
AL139147.1  
TRUB1  
ANXA10  
PAQR3  
IFI16  
AC026471.6  
MIR569  
RNU4-23P  
WDR36  
RNU6-377P  
ACER2  
AL691447.2  
KRT18P68  
FAM149B1  
APOBEC3B  
HLA-F-AS1  
FAM110C  
RAF1  
SNORA80E  
ATXN1  
PSME1  
CDT1  
NAA30  
ZNF808  
AP000870.1  
ARID1A  
DNAJB1

---

---

HLA-G  
DDX47  
ANKRD10-IT1  
C16orf58  
AL589745.1  
LDHAL6B  
EXOC5  
TRPV4  
LARP1P1  
AC096721.1  
MMP28  
CYTH2  
HTR5BP  
SOCS5  
RAPGEFL1  
AC009163.1  
MIS18A  
CRYZL2P-SEC16B  
SLCO3A1  
NPM1  
HARBI1  
DENND6A  
ZNF518A  
AL354993.2  
RBM44  
MIR559  
RAET1K  
TP63  
CDKN2A-DT  
AC079070.1  
TRIM10  
KRT78  
UNC93B1  
TPI1  
CGB5  
GBE1  
DQX1  
CPT1A  
LINC01270  
IL15RA  
RNA5SP123  
MED6  
ARF4P1  
TMEM154

---

---

AC004923.1  
EDN1  
RTKN  
AC011479.1  
SMC5  
AL450322.1  
PDZD7  
AC108727.1  
TAF6  
EEF1DP5  
POLD4  
AC091132.2  
AC009237.9  
DOCK1  
MTCYBP21  
CEP72  
MIR608  
CCZ1  
SLBP  
TMEM62  
AEBP2  
PTDSS1  
SRD5A1  
FYTTD1  
AFG3L2  
AC073957.3  
GAPDHP44  
SLFN12  
CEMIP  
PCNX4  
POU2F1  
FBXL18  
XRRA1  
CXCL11  
MFSD13B  
AC063976.2  
FAHD2P1  
YBX1  
SKI  
PATE2  
DSC3  
IRAK3  
ADAP1  
PLEKHH2

---

---

PHC2  
BATF2  
CHCHD3  
AP000402.1  
POLR2C  
CYP2J2  
FOXD2-AS1  
LINC00511  
ARHGAP26  
TTC27  
KDM7A  
HIST3H2BB  
NAA35  
LITAF  
AL138881.1  
GINS2  
KRT8P37  
EBNA1BP2  
PPP1R8  
AL513123.1  
TAF1D  
LINC00944  
AC107021.1  
NPM1P26  
TAS2R38  
IGFL1  
AC244230.1  
MRPS6  
WDR62  
CDC42EP5  
PTMAP8  
MTND4P9  
HIST2H2BC  
PCMTD1P3  
LIN28AP1  
CPPED1  
IER3  
ITGBL1  
PTPN20CP  
ILF2  
AC091057.4  
KLHL7  
AC095031.1  
TMPRSS11E

---

---

AL356274.2  
AC009041.4  
YTHDF2P1  
EFTUD2  
ZNF695  
STXBP3  
ATAD2B  
AC004817.4  
TPI1P1  
TBK1  
HDAC7  
GCKR  
AC130456.3  
AC007191.1  
HILPDA  
SLC7A1  
RNU6ATAC18P  
DDX46  
FAM45A  
CRYBG3  
ATP8B1  
MITD1  
AC007014.2  
AP005264.1  
USO1  
U52111.1  
CSF2  
AC087857.1  
MIR1296  
RNU6-808P  
AL049697.1  
KDM4A  
AC027544.1  
REL  
BEST4  
IL4R  
CLCN3  
GID8  
AC008870.4  
MAPRE1  
AC067930.5  
MLKL  
OSBPL11  
AP002478.1

---

---

IPPK  
PI4K2B  
MGAT3  
AL731533.1  
NDNF  
VWA3B  
SBK3  
ANKLE2  
PTPN11  
AL035456.1  
AC016877.3  
PPP1R3D  
RTF1  
AL162431.3  
CARD6  
PLEKHG3  
ZNF888  
UGT1A12P  
LY75-CD302  
MIR6784  
UMAD1  
AP3M2  
TIGD2  
AC092964.1  
USP18  
AQP5  
EPHB6  
C12orf56  
SLC6A8  
HOMER1  
E2F4  
WDR76  
EIF1AX  
LGALS8  
LGR5  
ZFAND6  
CLIC5  
CDSN  
MAFF  
UBR1  
TMTC3  
ZNRF2  
EGLN3-AS1  
AC016735.1

---

---

NUTM2F  
CEPT1  
SPRY2  
LCLAT1  
AC128688.1  
AC099342.1  
AXIN1  
TNFAIP6  
PIBF1  
XXYLT1-AS1  
VPS9D1-AS1  
UBE2B  
ELMO3  
ZNF277  
FARSB  
SORD2P  
PLS1-AS1  
AL359955.1  
UQCRC2  
LARP1  
IRF2  
BIRC3  
HIF1A-AS2  
AP001107.1  
DTX2  
CTAGE12P  
CREB3L1  
RPL12P44  
Z93242.1  
MTND6P21  
AC010983.1  
AC087241.4  
AL583722.1  
DNAAF3  
ZNF365  
RNPEP  
GLI2  
RFC5  
AP003472.1  
HIST1H2BF  
AC090971.2  
TNIP1  
GDA  
ECM1

---

---

MIR616  
MRPL44  
INTS6  
AC104447.1  
LRR1Q4  
TMEM51  
CDCA7  
AP000696.1  
POLR2B  
TM9SF1  
OACYLP  
AC092368.3  
AC018695.4  
KANK4  
AC009238.2  
BMI1  
COL6A3  
API5  
CLNS1A  
HSP90B1  
CGB8  
SUPT16HP1  
HIVEP2  
ODR4  
PPP4R3B  
PQLC3  
DRAM1  
HIP1  
HYOU1  
AL035420.1  
MSMO1  
BACE2  
AFDN  
ALG8  
SLC45A4  
E2F6P4  
PCNP  
ORC1  
GPR78  
MTA3  
ZNF827  
HIST1H3B  
ANKRD61  
ZNF117

---



---

SENP1  
AC004080.6  
NRIP1  
GDPD3  
AL162258.1  
AL121790.2  
VWA2  
EEF1DP3  
B3GALT5  
MIR222HG  
AL356390.1  
PITPNB  
KAZN-AS1  
ATP2C2-AS1  
TMEM8A  
MGST1  
C3orf67  
HIST1H4K  
LZIC  
MIR579  
CCDC90B  
FIRRE  
IGSF9B  
PARP4P2  
TRAP1  
RNU1-134P  
SRPX2  
APEX1  
IL2RG  
ZG16B  
SPAST  
ZSWIM4  
AC079062.1  
DAP3  
KRT8P49  
CALML4  
CTSA  
CENPQ  
ZBTB12  
FAM102B  
KLHDC7B  
SLC7A5  
PKP1  
PVR

---

---

GABRE  
BNIP3P7  
CDKN2A  
USP9X  
SOX21  
ABHD5  
CEP350  
AC093908.1  
ZNF680  
AC093732.1  
AMZ1  
C14orf119  
CAPZB  
DNAJB14  
AL442125.1  
AC005632.1  
VDAC1P11  
STK35  
KLF10  
AC137834.1  
AC092115.3  
AL359555.1  
EFL1  
EIF1AXP1  
GTF2F2  
RNF6  
AC087385.1  
AK3P3  
STEAP3-AS1  
RPS5P2  
CCNE1  
DNAJC2  
EPDR1  
LINC02246  
AC008967.1  
NPTN  
GET4  
CPNE3  
OCLM  
AC006460.1  
TBC1D15  
CRIPT  
TMPRSS2  
AC108729.1

---

---

AC011472.5  
AC090164.1  
CHMP5  
USP47  
ZNF710  
AC051619.2  
AC233968.1  
BBIP1P1  
PITPNM1  
NAF1  
LNCSRLR  
CHM  
OGFRP1  
USP31  
ACACA  
AL365436.2  
HNRNPA1P45  
LINC02454  
MECR  
OSBPL5  
HSP90AA2P  
SLC5A12  
WFDC10B  
AC091805.1  
ZNF562  
ERVMER34-1  
SAMD12-AS1  
RBM8A  
FAM136A  
GLRX2  
LINC01801  
AC022034.1  
AC008687.6  
ZEB1-AS1  
AC006483.1  
LINC01843  
C2orf69  
PIK3C2G  
PPARD  
XYLT1  
NAGS  
SLC41A2  
TRMT61B  
CYCS

---

---

MTND4P2  
CCDC85C  
MTHFD1P1  
CDC42BPG  
AL512274.1  
CYP4F3  
NOC3L  
SLC52A2  
AL360270.2  
COTL1  
CD274  
LINC01593  
AC091959.2  
SDAD1  
SCP2  
PARP12  
SALRNA1  
CYP4A22-AS1  
PARVA  
ZNF341  
AL031848.1  
PBK  
CEBPZOS  
RB1  
LINC02100  
SEC24D  
MTM1  
BEAN1-AS1  
IPO8P1  
RNF103  
CACNB3  
RFFL  
CCAR1  
IL1A  
RN7SL566P  
CXADR  
CTAGE15  
KIAA1549L  
STAU2  
GPATCH1  
EXOC4  
MTA2  
UFM1  
HOXB-AS3

---

---

KRT18P38  
MRPS22  
SLC12A4  
SP2-AS1  
TOX3  
FAM20B  
AC105219.3  
RN7SKP21  
STN1  
CCNJ  
CCT4  
ARPC3  
AC022405.1  
CLMN  
AL136115.1  
CDCA7L  
TCEAL9  
RN7SL431P  
SMARCC2  
ZNF611  
PANCR  
AL136116.2  
AC131532.1  
EEF2K  
HK2P1  
STRN4  
DNAJA4  
AP001610.2  
EDNRA  
TIAM2  
SDHC  
CHST11  
ZNF341-AS1  
AC005288.1  
KIAA1191  
NUDCD3  
TRRAP  
AKAP14  
PAK4  
S100A5  
TMEM68  
PPA1  
NT5C3A  
OR7E116P

---

---

PFDN4  
PMS2  
RPS15AP10  
AATBC  
CALR  
IFITM1  
LARP4B  
MAPK15  
PDC  
EMP1  
AC138150.2  
HIST1H2BN  
TANC2  
CASP2  
ANO7L1  
LPIN1  
AC108359.1  
CDHR2  
CTSZ  
MEX3D  
HOXC10  
AC008114.1  
ELOCP19  
HP1BP3  
AC004080.3  
ADTRP  
PDIA3  
TRHDE-AS1  
COL1A1  
SDHD  
COG4  
MARCKSL1P1  
HLA2  
GNA13  
TRIM14  
ZBTB34  
GIPC1  
ABHD11  
E2F1  
EPYC  
KRT8P10  
AC233699.1  
AC022211.1  
DDX3X

---

---

MED12  
CSDE1  
KBTBD12  
MORC3  
AC008740.1  
FLII  
EIF4EP2  
AC099518.1  
SRGAP2D  
ZNF609  
AC005828.6  
AC007556.1  
CDK16  
AL139352.1  
AC002367.1  
RMC1  
SLC9B2  
BAG5  
DLEU7-AS1  
ASH1L  
KATNBL1  
BAZ2B  
UBA52P6  
TGFBI  
CDK2AP1  
SNRPGP2  
MED20  
MR1  
TMEM67  
NAPEPLD  
AL034550.1  
ARL2BP  
CLIC4  
AC099518.4  
LPIN2  
ZBTB38  
EZH2  
YTHDF1  
UBC  
BTN2A3P  
RAD23A  
AL390729.2  
CLCF1  
GLCE

---

---

MRPS31P1  
CHAC2  
SMC6  
ZNF137P  
RBM15  
ACSF2  
SIGLEC6  
LRR1  
CDC5L  
TMEM161B  
POSTN  
TSTA3  
RTN3  
DNM1L  
SUMO4  
PCDHGB8P  
AC021106.1  
EAF1  
TMEM184C  
ITGB5-AS1  
GIGYF2  
AC011483.1  
AC009495.1  
AC113386.1  
CCDC51  
RNU6-1191P  
HMGB3P14  
ARHGEF2  
IRF1  
SPCS3  
AL139246.3  
MORF4L2  
TRAPPC10  
LURAP1L  
AL606834.1  
LINC02562  
TONSL  
MPHOSPH10  
AC009803.2  
TRPC4AP  
NOTCH2  
HIST1H3J  
SRGAP2C  
HFE

---



---

UGT1A9  
DLG3  
MUC20  
ANKRD36B  
SEC31A  
TTC31  
KYNU  
SEMA3A  
AL136295.5  
PDZD11  
AL591806.1  
AC022126.1  
CEP135  
AC023906.5  
NKIRAS2  
AL121987.1  
ORMDL2  
AC124067.4  
MRPL30  
LEXM  
ERRFI1  
KRT17  
PTAFR  
RBM12B  
NUP155  
NRDC  
DDX50P1  
SMURF2  
SCCPDH  
PRKAB2  
GTSE1  
PYCR1  
MLX  
HOXA11-AS  
IL23A  
AC090791.1  
AC026120.1  
FOXJ3  
GAPDHP71  
SNRPEP2  
VPS4B  
PNKD  
TIMM17A  
EP300

---

---

AC114763.1  
MTFR2  
SFT2D2  
C11orf86  
CYCSP45  
IFFO2  
CTNNBL1  
B2M  
HIST1H2APS3  
MITF  
IBSP  
WDR3  
TATDN1  
AL591806.3  
PHACTR4  
NIPAL3  
AL512413.1  
OSGIN1  
LINC01719  
MIR4767  
DDX11  
HMGB1  
ASAP1  
INSYN2B  
METTL11B  
HSPE1  
LINC00705  
DNAJB3  
PPP1R3G  
WASF2  
AC069360.1  
ARL14  
PLXNA3  
RNASEL  
RNA5SP28  
AC002066.1  
ZSWIM6  
NCR3LG1  
KIF16B  
BCL2L12  
AC092718.5  
HIST1H1C  
PXYLP1  
SNORD117

---

---

PPP2R2A  
AURKB  
PAPSS1  
CR383656.1  
ISY1-RAB43  
AL133243.2  
AC021218.1  
PRAG1  
RNF128  
HIST3H3  
HIST1H2AD  
AC010271.1  
HOXC-AS2  
RHOT1P1  
MBTPS1  
SEC24B  
MEGF6  
MORC4  
AC025252.2  
DDB1  
SINHCAFP1  
DNA2  
AC130689.1  
PRR5L  
ZNF114-AS1  
AC011676.5  
RCN2  
DNAAF5  
HIST1H2BM  
ADAMTSL4  
HIST2H2BE  
PPME1  
ACP1  
AC004009.3  
RPS6KC1  
CMTM7  
B3GALNT1  
TCAIM  
GLG1  
AC021087.1  
LINC02535  
RPN1  
AC009994.1  
IHH

---

---

AC114812.1  
PTPN1  
ASB7  
AC100854.1  
ARNTL2-AS1  
SHISA5  
MED28P3  
ADCY7  
AC009093.1  
AC008155.1  
C5orf15  
AC117409.1  
MICU1  
AAMP  
SINHCAFP2  
ZFC3H1  
PAX9  
HIST1H2BO  
PTER  
C5orf66  
NCOA4P3  
C15orf48  
TM7SF3  
CSTP2  
IFNGR2  
AC108449.1  
RNF214  
ZBED6  
SETD3  
SEL1L3  
NUP35  
NFATC2IP  
CHD1  
TRAFD1  
SOCS4  
NUP133  
EFCAB1  
SPTLC1P2  
ERAP1  
BCL2L2-PABPN1  
AL021068.1  
XXYLT1  
AKAP4  
AC022165.1

---

---

OTUD1  
GGPS1  
EFNA2  
RN7SL809P  
GPR1  
TK2  
HSD17B2  
ADAM19  
COL8A2  
AL033381.1  
AC100861.1  
ARID4B  
AL606534.1  
TNRC18  
ABCB11  
RBM43  
SHANK2  
AADACP1  
RAB31  
VPS13B  
LINC00920  
C2CD3  
SUSD6  
CD47  
TCERG1  
STYXL1  
NACC1  
AC104024.2  
TSPAN8  
ATMIN  
GATAD2A  
PDE6D  
SYPL1P1  
PAFAH2  
SPINT4  
AC004009.1  
RAB2A  
NECTIN3  
CEP170B  
ANAPC10P1  
EIF4G3  
ZXDB  
EHBP1L1  
PHKB

---

---

LYPLA1P3  
SRD5A3-AS1  
TIMM23B  
UBE4A  
NSUN3  
PTBP1  
SLC44A2  
RASSF3  
RAB43  
BATF  
AC015971.1  
HIST1H2BL  
SF3B2  
SNRNP200  
AL354813.1  
CCT2  
RIOX2  
MEF2A  
FAS  
ASCC1  
BBX  
FNIP1  
FOXC1  
BMP2  
VSTM5  
AC009226.1  
SPATA5  
STYX  
MIR4435-2HG  
NSMCE2  
SLC29A2  
AL445183.3  
AC004009.2  
KRT18P10  
ERMP1  
AC068946.1  
RN7SL382P  
LINP1  
SRCAP  
FPGT  
FANCD2  
ZNF480  
LINC01615  
PLAGL2

---

---

FAM160A2  
AL136531.3  
SUMF1  
RF02141  
EHD4  
THUMPD3  
ARF1  
EHHADH  
VDAC2  
LINC02188  
LSAMP-AS1  
AC090695.1  
PUS7  
AP000688.2  
ASCC3  
AC026356.2  
SNAI2  
AQR  
MBNL3  
PPP1R18  
PLK3  
APAF1  
PRKCZ  
MKRN2OS  
SLC22A13  
AC090181.3  
PACS1  
SLC9A2  
SLC50A1  
DDX1  
MAP4  
SINHCAFP3  
CAPN8  
SYNE2  
HIST1H3D  
HNRNPUL1  
GLYR1  
LMTK2  
MAFK  
ITPRIP  
AMOTL2  
TP53I11  
NTSR1  
AC011773.3

---

---

ETNK1  
GARS  
TRIO  
METTL8  
THOC3  
PODXL  
RNF111  
AL359745.1  
HNMT  
EPA1  
UGT8  
LARP4  
SCUBE3  
MACF1  
TPSP2  
RAD23B  
GCNT2  
MYO18A  
DDOST  
UNC93B4  
S100A4  
PPM1G  
NUP205  
AL451164.3  
PERM1  
VGLL3  
LHFPL2  
NTF4  
NOP58  
HBP1  
SLAMF6P1  
AKR1C7P  
C1orf105  
AL133230.1  
PSAPL1  
TMX1  
L3MBTL3  
BTBD10P1  
KRCC1  
TMED5  
PGAM1P8  
AC092718.3  
FOXD2  
AL360007.1

---



---

ARAP3  
GSTCD  
ETV4  
PSMD10  
DDR1  
AC013268.3  
AC020900.1  
TAOK1  
AC022211.3  
PLEKHG2  
SHKBP1  
ULBP2  
DCP1A  
TXN  
AC073410.1  
COL3A1  
NCAPD2  
AC009133.1  
MON1B  
IQCE  
PDXDC1  
C1orf74  
SMCHD1  
RNU4-53P  
DVL3  
PABPC3  
ILK  
MIR199A1  
MRGBP  
CYP51A1  
SERPINH1  
SCAF11  
AL133370.2  
NORAD  
NSD3  
RELL1  
PBRM1  
SNX27  
ZNF720  
SOS1  
MGME1  
EXOSC10  
AC103923.1  
SH3BP2

---

---

ZNF765  
AC004917.1  
RPS6KA3  
SBNO2  
IPMK  
SBDS  
CPD  
FXR1  
ABHD14A-ACY1  
DNAH2  
CUX1  
AL133330.1  
DRD1  
KDM5A  
OSBP  
UBQLN1  
PNRC2  
NSUN2  
ARHGEF5  
AC004817.1  
RPAP3  
DCTN5  
SLC17A9  
LINC01376  
AC005753.1  
PARP4P1  
RBBP4  
SLC22A18  
AL356273.1  
STPG1  
PCAT7  
NPM1P5  
SFTA2  
UBXN10  
NUP58  
HOXA-AS2  
PORCN  
AC243967.2  
UGT1A7  
HERC3  
IFIT3  
INTS4  
TRMT5  
ECEL1P2

---

---

PSMD8  
AC008147.2  
KMT2E  
CDR2L  
HNRNPA1P3  
DDIAS  
BIRC5  
KRT18P19  
ATG14  
TRNT1  
PDZK1IP1  
TM2D1  
C10orf55  
ECD  
ARSJ  
TMSB10  
AC004596.1  
MARVELD3  
DPYD  
KCTD9  
EIF1AD  
BUB3  
AF124730.1  
CCNE2  
TRIM15  
C4BPB  
CFAP97  
RPL37P1  
AL365356.5  
SLFN5  
KCTD11  
TCF19  
AP001271.1  
TDG  
CLDN7  
LFNG  
HOXB-AS2  
AC138305.1  
LGALS4  
MMP11  
TSNAX-DISC1  
ZNF532  
SDCBP  
NCSTN

---

---

KRT18P11  
UGP2  
AL356310.1  
SOX21-AS1  
ENAH  
B4GALT4  
HSPA14  
FBXO38  
ENTHD1  
GRB7  
ELF3-AS1  
GDAP2  
BAG3  
ETFA  
SNW1  
NOMO2  
LRRC6  
STX3  
OSBPL1A  
TUBA1B  
EPS8L3  
SOX13  
TNFSF15  
GCSH  
CCDC15  
TSPAN3  
DSCC1  
MCM7  
AGR2  
SLC37A3  
ADNP  
MED1  
CSGALNACT2  
FER1L6  
ACSL4  
AC073569.2  
CAMSAP2  
FUT4  
GALNT6  
GSTP1  
AC096720.1  
B3GLCT  
LINC01656  
IPO7P2

---

---

YBX1P10  
ESCO2  
HSPD1P4  
AC010328.1  
BRIP1  
MREG  
AC021078.1  
MBNL2  
CCDC9B  
KIF13B  
AC010761.4  
RASA3  
SETD5  
AP002373.1  
AL353807.3  
AC123905.1  
MCL1  
SPIRE1  
AC083899.1  
EPSTI1  
PLEKHM1  
IRX5  
TRIM33  
ZDHHC20-IT1  
MBTPS2  
AL445435.1  
PI3  
SEMA4G  
AC108860.1  
CEMIP2  
TGFB2-AS1  
AL590004.3  
CTDSPL  
HIST1H1T  
TRMT11  
AL035458.1  
FIGNL1  
DHRS9  
DKC1  
GALM  
AL357033.2  
MTX2  
AL136115.2  
MGAT3-AS1

---

---

COL1A2  
LBX2-AS1  
HOXA9  
ATRX  
AC011753.4  
NRAV  
TK1  
AC078899.1  
VGLL1  
CMTM3  
ZC3H11A  
CNOT9  
DEFB131B  
LRP1  
KDELR3  
ETHE1  
PCDHGC5  
PLOD1  
DNAJB11  
AL109614.1  
BRCC3P1  
NIPA1  
PUM2  
MTBP  
PSMB9  
AP001033.2  
LINC01269  
CTPS2  
PHF14  
AC008687.2  
CXCL8  
LINC01633  
HSPD1P1  
ARL4AP4  
AC106886.2  
MIR3153  
SET  
RFC3  
LINC01748  
GCOM1  
RAB9A  
PSCA  
C5orf24  
WNT7A

---

---

AC040174.1  
TNFSF4  
LPGAT1  
AC114812.2  
MROH9  
LAPTM4A  
PPP1R2  
MIR4263  
FNBP1L  
IFNAR2  
AC104109.4  
HCCS  
UGT1A1  
AC026401.3  
PLPP2  
ABHD2  
AC127496.2  
LINC02519  
LINC00605  
SNORD89  
NUBPL  
FOXC2  
TKT  
AL158201.1  
SLC15A4  
EI24  
SCN5A  
HS3ST1  
DIRC2  
NECTIN2  
SRGAP2  
PSMC2  
RNF19A  
CSTB  
CYP2C18  
PPP2CA  
TALDO1  
FRYL  
RAB11A  
AC091173.1  
IFIT2  
C1D  
HPGD  
EMC1

---

---

SMOX  
TUBBP1  
PREP  
TRNP1  
PKMYT1  
RN7SL36P  
LPCAT4  
AL357558.1  
AC098934.3  
KCNA10  
GPR157  
DERA  
CTSV  
TMEM183A  
AC015983.1  
RBM27  
AP005233.2  
GPATCH8  
GOLIM4  
PIM1  
LTBP1  
MYCBP  
SMC2  
ALAS1  
TFAM  
REPS2  
GOLPH3L  
ARID4A  
MED21  
IL18  
CHP1  
DHDDS  
PDS5A  
KRT15  
STK38  
PGAM1P7  
DHX8  
SNORD12B  
FAM83A  
TNNC2  
AC026462.1  
GCC2-AS1  
PAPPA  
HIVEP1

---



---

FAF2  
PTGFRN  
ZFYVE21  
PHF13  
ARPC1B  
TOMM20  
CRABP2  
ATF2  
LOX  
S100A6  
ANKRD42  
MAP2K1  
STAG1  
SLC34A1  
SERTAD3  
CUL4B  
EHD2  
UTP14A  
PRAL  
SLC44A4  
CPSF6  
ZMYM2  
KDM3B  
SLC38A7  
HSPG2  
MYH16  
CCNI2  
AC130456.2  
PIK3C2B  
AC008687.3  
RNU6-863P  
BTF3L4P2  
RFC4  
HEATR5A  
VKORC1L1  
HIF1A  
GALNS  
RBMS1P1  
AC011611.6  
MKLN1  
CSNK2A1  
AF127577.4  
CPEB2  
DUTP1

---

---

TRAF4  
HSPH1  
AC019117.1  
ANKRD28  
AC010735.2  
DCTPP1  
RGS6  
CNOT2  
TMEM267  
TNKS2  
GCN1  
MRPL49  
XPO5  
TYMS  
ZNF384  
C5orf51  
USP53  
TROAP  
AC025575.1  
CD58  
COL8A1  
GRTP1  
SYTL5  
EFHD2  
ARL4AP5  
UBE2W  
ARHGAP18  
EIF3I  
YTHDF3  
ELF3  
BMS1  
AKT1  
AC114812.4  
CUL4A  
AP000619.3  
CATSPER1  
TMEM231P1  
RRAGC  
SEPT7  
SMS  
CDC27  
MAGI3  
YKT6  
DST

---

---

RAB5B  
DCAF1  
SUPT16H  
RNF213  
BCL2L14  
CD164  
DNTTIP2  
LINC01473  
CHST6  
LINC00939  
AP000695.3  
SLC45A3  
PPP1R12A  
LY6G6C  
OSBPL8  
OCIAD2  
UBE2L6  
SLC25A40  
CAPZA2  
UGT1A13P  
HDAC9  
CANX  
MKRN2  
CCDC43  
GK5  
LINC02323  
RBM47  
MTOR  
MTCH2  
DDX10  
COP1  
RAB8A  
KRTAP4-1  
TUBA4A  
PPRC1  
AC011242.1  
CYP2B6  
HUWE1  
PLPP4  
FOXD1  
CDV3  
AC022973.4  
AC093520.1  
HIGD1A

---

---

TMA16  
ETV7  
NPAT  
MCM6  
PNPLA3  
AC110760.3  
DMBX1  
HDLBP  
ATF6B  
THRAP3  
LINC01614  
RNU6-767P  
RP1L1  
MIR561  
RHOQP1  
CTDSP2  
ANKRD11  
AC004980.2  
AC022784.5  
MLPH  
NUTF2  
CARS-AS1  
MAP3K5  
ZNF12  
UBE3C  
AC023271.1  
PICSAR  
SPTAN1  
AREG  
IMMT  
AC011476.3  
PRSS12  
PRDX1  
CCZ1B  
IL20RB  
AC025423.1  
RHBDF2  
CASP6  
MRE11  
COPS2  
CYP4F12  
WDR55  
CLIC3  
PRSS51

---

---

NMU  
NEK6  
ALPP  
DPAGT1  
PLEKHG5  
KRT6A  
AC091931.1  
GPS2P2  
AC090833.1  
LINC01137  
NRP2  
RAI14  
MTIF2  
COPS5  
HCG15  
KRT13  
TMEM135  
AL662791.1  
CIAPIN1  
ZNF702P  
EIF4A1P12  
PCDHB9  
FBXO36  
DNAJC11  
DBF4  
CENPL  
FRK  
RNU6-652P  
GJB6  
AC008687.4  
ETF1  
SUZ12  
ABRACL  
DHRS3  
UBXN7  
MRPL15  
AC131888.1  
MTHFD1L  
PCDHB14  
AC138392.1  
ARHGEF34P  
SHH  
GPR35  
KPNA3

---

---

CASC8  
NTM  
EDAR  
CASP7  
AC096536.1  
LINC02057  
TLCD2  
TWF1P1  
EPS8L2  
MYO5B  
AL139039.1  
PCSK5  
DUSP5P1  
CAMKK2  
ALDH3B2  
NUP62CL  
SPINT1  
RICTOR  
SRGAP1  
AC011294.1  
FAM222B  
MB  
ZNRF1  
ATP7A  
NEK4  
RNU7-159P  
GSDMB  
TJP3  
SLC10A3  
KLHL20  
FKBP14  
AC105446.1  
ACOT4  
PLEKHA3  
USP37  
RAET1E  
AC073283.1  
AC025580.2  
ABHD11-AS1  
NSD2  
CENPU  
CNOT8  
OPLAH  
TGOLN2

---

---

THRB  
SULF1  
SALL4  
TGFB2  
HIST2H4A  
AC097637.1  
HOXB5  
FAM83E  
DENR  
ARHGEF19  
RYBP  
INO80D  
NAE1  
HPDL  
FAM129B  
PTMAP4  
DNAJA3  
EXOC8  
YIPF4  
TMEM79  
AC068594.1  
METTL5  
SMARCE1P1  
SLC10A7  
PON2  
RN7SL706P  
LINC01213  
FER1L4  
MISP  
TCF12  
ADGRG1  
SH3D19  
GANAB  
AC004808.2  
RAN  
GTF2B  
PPP1R14D  
C11orf58  
AC090505.2  
MORC2  
UPK2  
PADI1  
NCOA2  
NEMP1

---

---

TRIB2  
MYADM  
WNT7B  
KIAA1211  
PTPRE  
SNRPGP15  
OSBPL2  
TSN  
C12orf49  
AC244153.1  
PROSER1  
CDK18  
MARCKSL1  
NCOA3  
GTPBP10  
RNF44  
AC100821.1  
POLB  
AC239798.4  
CAD  
LNX2  
XPNPEP1  
AC243960.2  
AC007336.1  
LRRCC1  
APOL6  
AC005550.2  
RNF7  
PRDM8  
AC068580.1  
ATP10B  
ALPK1  
AP000695.2  
AC007285.2  
LTBR  
FBLIM1  
AL590652.1  
DUSP5  
ZBED2  
LINC01705  
MIR6835  
BTBD7  
CGB7  
LINC00630

---



---

PLEKHA5  
ALDH18A1  
TGM2  
PSMB8  
GPX8  
RNU6-403P  
AC139722.1  
ZNF274  
JOSD1  
HSP90AB1  
SLC22A18AS  
ACBD3-AS1  
USP24  
AC005476.2  
STK24P1  
RF02140  
TOB2  
RB1CC1  
MIGA1  
RF00405  
KLK10  
CD44-AS1  
AC130456.4  
HOXA11  
VCAN  
FAM214B  
KLHL30  
RPS12P26  
EML2  
WASHC5  
DCLRE1B  
KLK7  
AC140479.2  
HNRNPA2B1  
TMEM173  
LRRC31  
ZFAND1  
ATP1B1  
IDE  
ATF1  
ABCA13  
CASC4  
BX640514.2  
GINS4

---

---

ACOT9  
GAPDH  
AC108058.1  
S100A2  
OSTCP1  
SERTAD4  
KIF26B  
RSAD2  
SLC25A13  
CBL  
CHMP4B  
PCDHGB2  
CDC42P3  
DSG3  
KIF2A  
COL22A1  
FAM49B  
RUNX1  
UBXN2B  
ADAT1  
CAPN5  
LINC01776  
PICART1  
TMBIM6  
COL5A1  
FAM118B  
LINC01842  
LINC01873  
EIF4H  
CDH11  
LPCAT3  
UNC5B  
TAGLN2P1  
MEMO1P1  
DNM2  
RDH10  
ZBTB1  
BLOC1S2P1  
TMED7-TICAM2  
ESF1  
AC115284.1  
SLC35E1  
DHX36  
ATF7

---

---

FLRT3  
G3BP2  
CDC42BPB  
ZNF587  
BRCA2  
NUCKS1  
BCAS1  
MOSMO  
SH3BGRL3  
UBE2A  
WNT2  
AC023024.1  
FRMD4B  
ZBTB11  
AC027290.2  
ZC3HAV1L  
HOXB8  
ZC3H12A  
AP000904.1  
CAND1  
HERPUD2  
IER5  
WNT10A  
PDK1  
SPOCK1  
LATS2  
SPAG5  
AC023024.2  
BAG4  
FOXA1  
SRP9  
AC073333.1  
RAB25  
CDKL5  
TIPRL  
KCTD1  
ATXN2L  
AC105935.1  
PLAC8  
HOXA1  
KLHL24  
PARG  
FGFRL1  
DCAF17

---

---

AC055811.1  
C16orf70  
HMGB1P6  
CTHRC1  
PAIP1  
ZSCAN4  
UBQLN4  
MFSD6  
AL353693.1  
EDEM3  
FAM208B  
TRAPPC6B  
TAF5L  
TGS1  
SNX33  
MOCOS  
AC107021.2  
SCD  
SPINT2  
TNFRSF11B  
TNFSF9  
SLC39A11  
MPZL2  
TOMM34  
AC008406.3  
UBE2D3  
CHRAC1  
FAM210A  
CEP170  
HIST2H2BF  
NDUFS1  
ADAMTS6  
GNL3L  
SLC12A6  
COLGALT1  
CCDC34  
AC073551.1  
HSPD1P5  
PSMD11  
AK2  
SPRY4  
COL5A2  
RAB5IF  
HPCAL1

---

---

ORC4  
GON4L  
AL451042.1  
HMGN4  
TICRR  
DYNC1I2P1  
UBA1  
CYP2T3P  
EPCAM  
RER1  
PPIAP22  
IL7  
AC004990.1  
SYNPR-AS1  
TAF12  
AC007327.2  
CMPK1  
HSD17B12  
HMGCS1  
ZCCHC14  
AC091057.1  
IVNS1ABP  
NAV2  
RBM12  
AC012613.2  
LRRC37A15P  
NKILA  
MPRIP-AS1  
RN7SKP296  
SIAH1  
ZNF148  
EFNA4  
ZBTB45P1  
RFLNA  
BBOX1-AS1  
NBN  
TAB2  
ARPC5  
TRIM6  
B4GALT1  
NF1  
ABO  
SLC35C1  
EMBP1

---

---

IPO9  
TMEM189  
ACY1  
DHX38  
IST1  
HOXB6  
SLC38A2  
LINC02584  
COPG1  
TSPAN15  
PTK2  
GCNT1P3  
C11orf80  
FUT2  
TEAD1  
HIPK1  
TMEM40  
AC073052.1  
SIKE1  
IGFBP3  
FZD7  
DGKA  
ANXA8L1  
RBP3  
KPNB1  
ANTXR1  
PROSER3  
MIR135B  
ABHD4  
LSG1  
AL365181.3  
PTTG1  
CARD11  
SLC9A1  
IGF2BP1  
AFF4  
RASA2  
AC083841.2  
AXL  
TLK1  
NPFRR1  
AC016722.2  
NECTIN1  
AGRN

---

---

CABLES1  
TMEM139  
LRRN1  
MYO19  
LMO4  
TRIP13  
BHLHE41  
CAPRIN2  
LINC00887  
ARHGEF18  
IRAK1  
EIF2B2  
TMLHE  
DENND1B  
AC026470.2  
AL157786.1  
AC142381.3  
NECAP2  
PRXL2B  
ATXN1L  
UBA2  
TFDP1  
FIP1L1  
PSMC4  
CST6  
TMEM127  
AL603832.3  
TWSG1  
FADD  
KCNK6  
SULT2B1  
HES2  
IMPDH1P5  
AC107308.1  
PLOD3  
AC114812.3  
EFCAB14-AS1  
CNKSR1  
WFDC3  
STIP1  
MIR7973-1  
TLN2  
RAC1P2  
GBP1

---

---

EIPR1  
SLC16A4  
LIN7C  
FAM220A  
PRDM10  
KMT5A  
FRMD8  
TBC1D2  
FOSL2  
UBFD1  
OTX1  
ZNF367  
MIS18BP1  
C8orf74  
AC093110.1  
ARHGEF12  
GOLT1B  
NKAIN3  
HSP90AA1  
FAM84B  
TTC9  
RMI2  
TBCCD1  
DHX32  
HAVCR1  
PCDHGB9P  
RAB21  
EARS2  
ERGIC1  
MANBA  
MIR4284  
CPSF3  
LBR  
IMPAD1  
ALG11  
LINC02595  
HES1  
PMEPA1  
RTP4  
BCO1  
DDI2  
LPAR5  
H3F3A  
DPP9

---



---

UGT1A6  
AC090673.2  
CRYBG1  
PCLAF  
CSE1L  
PNO1  
AC092611.2  
AL355312.3  
RUVBL1  
DDX19A  
PRPS2  
USP1  
SEPT8  
AKR7A2P1  
TM4SF1-AS1  
EMC2  
SPEN  
MYO5C  
NR1I2  
AL138689.1  
AC005261.5  
CDC42EP2  
KRT19P1  
CTDSPL2  
INTS8  
CDKN3  
ZNF654  
MASTL  
AC007283.2  
OPTN  
ZNF805  
MAIP1  
UNG  
SLC20A2  
AARS  
CCSER1  
DNAJC10  
TSPAN14  
AC025575.2  
BST2  
SOX9  
ITGA11  
S100A14  
RIPK3

---

---

DEPDC1B  
AC106712.1  
RTKN2  
GPC4  
STAG2  
LAMC1  
SLC39A4  
SULT1B1  
RABGAP1L  
MX2  
EGLN3  
RNU6-1161P  
AP005230.1  
AC093724.1  
MECOM  
LRRC40  
FAM72A  
HRASLS2  
RPS12P2  
WFDC13  
ALS2CL  
MSX2  
RNA5SP323  
PKD1L2  
GNL3LP1  
FAM83D  
ADD3  
AC009237.15  
PARP3  
NXT2  
BZW1P2  
FXYD3  
SRSF4  
MPZL1  
HSPE1P5  
SAMD12  
AC023632.6  
PDGFC  
RPRD1B  
C16orf46  
ANXA8  
AC245041.2  
ZNF701  
TNFSF11

---

---

LRRC57  
RIT1  
LMNA  
EMC8  
AC092881.1  
RCE1  
SOWAHB  
AC004920.1  
LOXL2  
CES2  
TSPAN6  
MCM8  
SNRNP27  
CTCF  
DUSP7  
SH3KBP1  
GOLGA4  
NOL10  
TMEM44  
LINC01655  
LINC02081  
ZNF644  
MIR4795  
SIX1  
AP000759.1  
TRIM31-AS1  
HMGB1P5  
RNU6-90P  
EIF2S2P4  
CELF1  
POLD3  
AC012531.1  
LSM14A  
ACTN4P1  
FMR1  
CMPK2  
GALC  
CCDC68  
GRHL3  
USP48  
AC027544.2  
AL591135.1  
ARFGEF2  
FBXO11

---

---

PTPRK  
SATB2-AS1  
KLHL28  
STAT6  
ZNF623  
MCFD2  
AMBRA1  
PML  
ADAMTSL5  
POC1A  
CDCA2  
RRN3  
LYPD5  
SLC6A20  
SSH3  
PKMP1  
PHF20L1  
XPOT  
AL450992.1  
THOC2  
SH3D21  
LDHAP7  
PTGES3P3  
DHCR24  
NUP54  
ZBTB41  
C3orf38  
RARRES3  
XAF1  
KIAA0556  
NEDD4  
FAM86LP  
GPR87  
RPL13P5  
GALNT2  
CNBP  
CD44  
ZBTB7B  
TPD52L2  
AL391280.1  
AC093616.1  
DEK  
POLE2  
CCNF

---

---

CLDN23  
RPL23AP77  
ERI1  
PSD3  
FGD4  
WASL  
PSME3  
BCL2L15  
TPR  
ALDH3B1  
AC018629.1  
BNIP2  
LINC01133  
JPT1  
MIR3131  
CHD7  
HOXA10-AS  
SPDEF  
AC124947.1  
RHOA  
MYNN  
NAA25  
AC004837.2  
PPP1R11  
NIFK  
RNF225  
AL031009.1  
SELENOF  
SIAH2  
GTF2E1  
VEGFA  
LINC01819  
SLC35D1  
AL139039.3  
ETV6  
CKLF  
PRELID2  
STT3A  
CHMP1A  
LYPLA2  
JMJD1C  
RAB38  
KDEL2  
FUT3

---

---

RARS  
SELENOI  
CCDC120  
C2orf49  
KRT8  
TLL4  
ACBD7  
AC022149.1  
CYP2S1  
SEMA7A  
CUL3  
B3GNT7  
VCAN-AS1  
COL12A1  
AC078883.1  
ANXA2P3  
STAMBPL1  
ACBD5  
WNT5A-AS1  
SH2D4A  
HAUS2  
STK31  
WNT5A  
ZMYM5  
YTHDF2  
SLC16A3  
CRNDE  
ABCA12  
CORO1C  
SLC7A7  
SUCLG2  
CKAP2  
AP003555.1  
IMPA1  
AL445933.1  
SLC12A2  
ANKRD20A5P  
UGGT1  
RAB7A  
ZNF597  
PLEKHA1  
TRIB1  
LIMK1  
TFAP2C

---

---

EFR3A  
GRAMD2A  
MED17  
SRI  
TMPO  
GBP4  
ZNF600  
AC011742.3  
LYPD3  
ZNF440  
FAM72B  
PHC3  
MFN1  
PHLDA2  
F3  
CXorf38  
FAR2  
SH3BP4  
VAPA  
PIMREG  
VPS37B  
TRAK1  
TAF4  
PTMAP5  
AC009237.14  
HLA-V  
KLK6  
VTI1A  
OTUD4  
TMEM30B  
NMUR2  
ARMC1  
TCF20  
RNF40  
TRPM4  
PPP1CB  
FANCB  
SLC17A5  
ANKRD27  
AL451042.2  
TEP1  
GMFB  
GRAMD2B  
UBE2H

---

---

AC135050.2  
CABP4  
CD151  
MCMBP  
TNFRSF10B  
EFNA5  
RALGAPB  
XRN2  
EPS8L1  
UBE2T  
DOCK5  
CTBP2  
MYBL2  
GLRX3  
BIRC6  
CASP4  
SEC24C  
STEAP3  
PARP9  
RAD21  
LDHAP4  
SEH1L  
AL513314.1  
TNPO3  
OR7E110P  
AHCTF1  
EFCAB14  
EPHX4  
AC108681.1  
ELK3  
ARHGAP23  
VPS37C  
ACTB  
NGEF  
SLC7A11  
PIK3C2A  
CPSF2  
FTSJ1  
SEPT11  
PTPRH  
GNB1  
CYFIP1  
USP6NL  
KPNA1

---



---

RAB3GAP2  
UBA3  
SLC35B2  
TBC1D23  
RALGPS2  
TAOK3  
GTPBP2  
CDC42BPA  
HSD17B11  
GNL3  
MAPK3  
AC132186.1  
ZNF770  
PGAM1  
FANCI  
UBE2I  
KLK8  
PLSCR1  
HAT1  
GTF2I  
ZNF260  
ALDOA  
AL445305.1  
ZFP64  
ATP1B3  
SAPCD2  
RECQL  
SMILR  
GCNT3  
RF01210  
GYS1  
SIM2  
KRT8P32  
NME7  
AC113404.3  
CREB1  
SQSTM1  
RPS6KA1  
DDX27  
PPP4R2  
LAD1  
SQLE  
FEZ2  
ANKRD22

---

---

SNAPC1  
GOLGB1  
RREB1  
RNMT  
CARM1  
EPS15P1  
PANK3  
MNAT1  
NR1D1  
ERI2  
SEC23IP  
C1orf198  
RAD54B  
CLSTN1  
AL359851.1  
PTPN9  
HNRNPK  
NCBP2  
CNN2  
CARMIL1  
VILL  
PPP1R15A  
ABCC3  
ZNF860  
ARIH1  
EIF3A  
TFRC  
ARL4C  
AC244517.7  
BDNF  
COL11A1  
AC009065.5  
THBS2  
GTF2H1  
CD55  
ZFPM2-AS1  
CIT  
AL136531.2  
CEP85  
AL049872.1  
AL161431.1  
SLC22A3  
ADAMTS12  
RBMXL1

---

---

UBAP2L  
LPP  
AGMO  
RTCA  
PRR13  
RPGRIP1L  
PSMB2  
TAGLN2  
LRIF1  
UBE2Z  
KNSTRN  
WAPL  
ITPKC  
RHOD  
CDK7  
BTNL8  
STT3B  
EVPL  
TIPARP  
TRAF6  
COL7A1  
YWHABP2  
SPRY4-AS1  
EIF3M  
SASS6  
MVP  
CHMP1B  
ADAR  
SSRP1  
PLEKHB2  
LINC02038  
XRCC4  
CTSE  
SLCO4A1  
HOXB3  
PRKG1-AS1  
RRP15  
DOCK9  
EIF6  
PRKRA  
TTC22  
DPH6  
PITX1  
NYNRIN

---

---

ENDOD1  
UGDH  
DLEU7  
HNF4G  
ZNF114  
RAB11FIP5  
PTTG1IP  
LACTB  
PFKP  
TBX6  
SLC16A5  
SUMO3  
HECTD1  
ANKMY2  
RBMS1  
AC010735.1  
CLIP1  
TOR4A  
RAPH1  
TARS  
ALG10  
SLC38A1  
ADGRF1  
CYB5R2  
ANP32E  
CKS2  
TMED2  
STRN3  
TNFRSF10A-AS1  
ASXL2  
COG5  
ORC6  
ST3GAL1  
ENTPD7  
LINC01572  
WDR12  
AC254633.1  
VIRMA  
CRIM1  
HNRNPL  
TUBB  
RNVU1-1  
ADGRE5  
MUC16

---

---

KRT18  
SRRM1  
SUDES3  
HIST1H2AG  
PIP5K1A  
PDIA4  
AC068580.3  
ZNF841  
EHD1  
ACTBL2  
EDEM1  
LINC02163  
AC009237.8  
TBX15  
ZNF207  
IL17RE  
SF3B6  
DIP2B  
DLST  
AP1G1  
GPN1  
AL360270.1  
TRIM16  
C16orf72  
TM4SF1  
ZC3H18  
AL162632.3  
NFXL1  
PRSS21  
ZFP36L1  
PLAU  
NEMF  
SLC6A6  
EXT2  
ACAP2  
TTC9C  
AF201337.1  
SIPA1L1  
FAM199X  
RN7SKP16  
NCAPG2  
CASP10  
CACUL1  
IDH1

---

---

PPL  
SYTL4  
ABCE1  
AP002761.4  
PSMA5  
OTUB2  
FAM126B  
TMF1  
RAD51B  
PIK3CA  
CLINT1  
CDK12  
C8orf31  
LRRC8B  
MAPK13  
CLDN16  
MXRA5Y  
SDC1  
CBLC  
LRRC42  
DNASE1L1  
USB1  
ORC2  
ZC2HC1A  
PPP1R1C  
HIST1H1PS1  
NHEJ1  
CCDC88C  
TRIM31  
VCP1P1  
OVOL1-AS1  
HS2ST1  
SULF2  
PSMA3  
SCEL  
CFL1  
OAS2  
LRCH1  
PTMAP2  
EIF5B  
RHOC  
PSMD2  
BORA  
DYNC1H1

---

---

HOTTIP  
NECTIN4  
OSER1  
EIF4G2  
AL928654.4  
CEACAM6  
MAL2-AS1  
LMLN  
SDCBP2  
SHCBP1  
AC114488.1  
ZPR1  
SRSF10  
AC008555.1  
METTL9  
LINC02257  
LRRC58  
ZBTB7A  
ABHD3  
ARFIP1  
SRGAP2B  
AL121772.3  
AIMP2  
UBXN4  
WTAPP1  
ATR  
UACA  
MED14  
CNIH1  
HIST1H2BJ  
TRIM21  
REXO2  
SMAD6  
UBR5  
PPTC7  
GTPBP4  
ANKRD36C  
MIER1  
UNC13D  
HNRNPC  
ELF1  
TMC5  
PNP  
AL451139.1

---

---

ZDHHC13  
PLEKHG6  
RAB27B  
NUS1P1  
DPY30  
AC112220.2  
RAB3GAP1  
CWC22  
SGPP2  
STAM2  
TACSTD2  
PARPBP  
ZNF281  
DCAF13  
LEPROT  
AL354714.2  
YIPF5  
SERINC5  
OSMR  
NFYA  
MOSPD1  
FAM135A  
NBEAL1  
EIF1P4  
AC006971.1  
PTPRU  
KRT8P46  
CNIH4  
SRP54  
PRSS8  
NPEPPS  
DCBLD1  
AP003555.2  
PIGA  
AC002128.2  
SUMO1P3  
BLACAT1  
POU2F3  
ACOT11  
C6orf223  
KRT7-AS  
EPRS  
RETSAT  
TMEM106B

---



---

SMIM15  
MAD2L1  
RSPH3  
AC078820.1  
AC073046.1  
RAD51  
ZNF468  
PPIG  
AFAP1L2  
ARHGAP27  
ERBB3  
ST14  
KPNA6  
TOX4  
FN1  
MTPN  
TNKS1BP1  
PLXNA1  
TPRG1LP1  
TRIM34  
PPP4R1L  
GRIN2D  
PIK3R4  
VTA1  
POC1B  
MAP4K5  
RNF169  
HOXA3  
PARN  
NEMP2  
SAP130  
AC090578.2  
SUMO1  
AL121578.3  
KIAA1841  
AC243967.1  
KIAA1551  
TUBB3  
EIF2S3  
TM9SF3  
TSKU  
FZD5  
VAMP3  
VSIG10L

---

---

SMAGP  
KLF4  
AC092142.1  
NLN  
MELTF  
LINC01232  
KIF18B  
DOCK7  
STEAP2  
SEPT2  
AC009065.2  
INHBA  
DYRK2  
SORD  
HNRNPA3  
H1F0  
FEM1C  
NCAPD3  
ROCK1  
CBWD2  
EIF2A  
SRD5A3  
GTF2IRD1  
TMEM170A  
ZMPSTE24  
MAT2B  
CEBPG  
DDX60L  
MDFI  
GOLGA5  
PCYT1A  
NOB1  
AC022509.3  
ATP2A2  
TYW5  
AP003031.1  
COX6B2  
IL13RA1  
C5orf22  
TRIM59  
MYOM3  
ASF1B  
AC024941.2  
ANAPC1

---

---

FAM120A  
ELMSAN1  
AL157838.1  
ATAD2  
LRRC59  
PRRG4  
LRPPRC  
SPRTN  
SGPL1  
FAM114A1  
LGR4  
CPOX  
LRP5  
LINC01876  
RNF223  
DUSP10  
LMNB2  
RN7SL368P  
CD9  
CDKN2B  
QSOX1  
LINC00973  
EXPH5  
LDHAP3  
AC008083.1  
EXT1  
SAE1  
STAM  
MYH9  
LDHAP5  
RSF1  
NOLC1  
GLUD1  
SIX4  
FASTKD2  
MTMR11  
RAG1  
TTC7A  
ALS2  
CAP1P2  
STS  
GGCX  
SKA3  
TBC1D8B

---

---

CERS2  
DAPP1  
PKM  
USP4  
ZMYM1  
USP39  
MYEOV  
DIS3  
AFAP1-AS1  
MZT1  
CHEK1  
HIST1H4I  
PDZD8  
PRKDC  
NAT10  
ATP2C2  
ESCO1  
DPM1  
SLC25A5P5  
PLK4  
SHROOM3  
LINC00857  
SAMD9L  
CDC42SE1  
TMED7  
MCM4  
SH3RF2  
AUNIP  
BAZ2A  
MAP3K2  
RPS6KA4  
CCDC6  
LRRFIP1P1  
NPR3  
ARL8B  
FKBP9  
VDR  
PLAT  
EIF2AK1  
DSC2  
AC120498.4  
PRRC1  
RBMS2  
ACSL3

---

---

ACVR1  
TPBG  
BEAN1  
MCM2  
AC020891.2  
AC245041.1  
CDS1  
AC078883.3  
GNL2  
DGKH  
SCNN1A  
EIF3C  
RNU6-26P  
TMEM144  
SNTB2  
NUP160  
UBE2E1  
CSNK2A2  
FOSL1  
FAM177A1  
KIF5B  
ATIC  
FUBP1  
QSER1  
SH2D3A  
ABLIM3  
LEMD1  
TBL1XR1-AS1  
ARFGEF1  
ENTPD5  
TAF2  
RUNX2  
NAALADL2  
ZDHHC20P4  
NFE2L2  
TMEM165  
C15orf41  
FRMD6  
YARS2  
LIMA1  
MACC1-AS1  
IKZF2  
KDM1A  
XRN1

---

---

AP3S1  
WDR75  
PABPC1  
UBR4  
GTF2A1  
CDC6  
BMP4  
PROM2  
AC093162.2  
PPIAP45  
NCOA6  
ERGIC2  
SNX7  
NOL4L  
SFR1  
CAV2  
SENP2  
MCM10  
GSK3B  
AC007255.1  
LRP10  
TXNDC9  
OSGIN2  
PLEKHA8  
CD3EAP  
ADAM8  
CMTR2  
AC007537.1  
CEACAM1  
AC002524.1  
CSNK1G3  
INF2  
WDR1  
AC036176.3  
TOB1  
PTP4A2  
PCBP1  
FCHO2  
GNGT1  
BPNT1  
AGO2  
WIPF2  
ENC1  
TM9SF4

---

---

CHMP3  
NQO1  
CCNG2  
AL023775.1  
COL10A1  
SESTD1  
STPG4  
FOXN2  
BIRC2  
CAPG  
CALM2  
ZBTB45P2  
RAB11FIP1  
AP000439.2  
CASC19  
SAMD4B  
PTGES3  
UBE2D1  
TFPI  
RF01233  
DOK4  
GTF3C2  
MANCR  
MMP14  
DNMBP-AS1  
TAP2  
ATP11A  
MYL12B  
PPAT  
ADM  
MTHFD2  
EXO1  
PKP4  
CCND1  
SMG7  
UBN1  
SHC1  
HNRNPCP2  
LINC01559  
MXRA5  
ERCC6L  
GTF3C3  
AP000695.1  
YEATS2

---

---

AP2B1  
GNPNAT1  
ATP2B4  
CNOT6  
C1orf116  
VSIG10  
LONRF3  
FUT8  
TOPBP1  
OIP5  
ERV3-1  
PDP1  
EFNB1  
SAV1  
ISG20L2  
AC005034.3  
CALU  
ARMC10  
SEC23A  
AC020891.3  
TMEM50A  
METTL15P1  
RLIM  
SERBP1  
KTN1  
BRWD3  
CNOT11  
IL1RN  
CD82  
SBF2  
MFSD14B  
PARP14  
PTPN14  
TUT7  
KIAA1217  
CHMP4C  
PPP2R5E  
GALE  
ZNF816  
AC068580.2  
FBXO45  
STAT1  
RNU6-1266P  
ALG1L

---



---

POLQ  
MCU  
NUFIP2  
APH1A  
ZSCAN20  
XIAP  
FLNB-AS1  
AC141586.1  
GALNT7  
NUP107  
RRM1  
RNF19B  
RN7SKP97  
CLIC1  
CA13  
PTPRR  
TMEM33  
NDC80  
AC010148.1  
MIB1  
ZWILCH  
AC046143.1  
KIFC1  
AP000619.1  
RBMS2P1  
COMMD2  
TMPPE  
MSLN  
TMEM39A  
DAG1  
TXNRD1  
PMAIP1  
HAS3  
AL606490.8  
F2RL1  
RELA  
NEIL3  
S100A11  
HMGXB4  
MAGT1  
SF3B3  
ZNF845  
AC005993.1  
PSMA1

---

---

RAD54L  
TMEM63B  
SERINC2  
HNRNPU  
SEMA4B  
CORO2A  
LSR  
NRBF2  
FCF1  
AC026356.1  
LUZP1  
HELZ2  
SRMS  
CYP27C1  
NPAS2  
DCBLD2  
FAM160A1  
RSRC1  
PTGES3P1  
COPA  
GRHL1  
CENPA  
SCYL2  
VGLL4  
OR7E14P  
YME1L1  
TNNT1  
GFPT1  
VANGL1  
DHX9  
PPP1R15B  
SLC52A3  
NCAPH  
CLSPN  
SF3B1  
ESRP2  
MYO6  
GNG12  
PAK1  
DNAJA2  
NUP37  
TCEA1  
SATB2  
PLOD2

---

---

LRRC8A  
DTX4  
SNX12  
RARG  
EHBP1  
METTL15  
7-Mar  
YOD1  
PTGS2  
KDELR2  
RTN4  
GJB2  
ANO6  
PSMD10P2  
HSPD1  
PSME4  
NUP93  
CD46  
DNMBP  
CDC42  
TP73  
MRPL3  
NIF3L1  
VDAC1P2  
GBP2  
TMEM45B  
SP140L  
ANXA1  
FOXM1  
EIF2S2  
HTR1D  
EHF  
CEBPZ  
ERBB2  
RPSAP52  
C5orf30  
AMMECR1L  
SH3PXD2A-AS1  
MIPOL1  
SNAP23  
IGSF3  
ARPC1A  
SEC24A  
FA2H

---

---

LY6E  
NUF2  
PAICS  
GPBP1L1  
ZNF460  
MOSPD2  
PSMC1  
OTUD7B  
RRAS2  
ICK  
BICD1  
SRC  
S100P  
KARS  
MAP3K13  
LONP2  
CDR2  
HIST1H2AC  
NCAPG  
CDC25C  
ACTN1  
CDCA4  
PNPLA1  
AP1AR  
DYNC1LI2  
PPP1R13L  
XPR1  
JUP  
ESPL1  
ADIPOR1  
TRIP10  
MARK2  
QTRT2  
POGK  
FAM111B  
SLC30A7  
MUC1  
PLIN3  
GDE1  
TWISTNB  
UBASH3B  
KRT8P35  
IGSF9  
ZNHIT6

---

---

DPY19L4  
LINC00346  
SLC1A5  
DIAPH2-AS1  
STX6  
KRT19  
TRAM1  
G3BP1  
COPB2  
AC022150.4  
UCHL5  
RFD3  
5-Mar  
CREG2  
ARHGAP12  
RBBP8  
TMEM92  
PIZO1  
SLC7A6OS  
CCNB2  
PPFIA1  
CEACAM5  
PAFAH1B2  
ENO1  
ATL3  
SDE2  
ITGB5  
GFM1  
LINC02086  
TMEM159  
ANXA2P1  
SGO1  
CDCA5  
CCT6A  
CENPK  
MPZL3  
RSPRY1  
IWS1  
RAB43P1  
LIMS1  
HKDC1  
DLG1  
SMG1  
RNF141

---

---

CCT5  
HHIP  
DESI2  
TPM4  
HOXB7  
PLS3  
ARPC2  
SYTL2  
APOL1  
SLC39A1  
CAMK2N1  
AC004943.2  
AP003555.3  
CERS6  
PLBD1  
HDAC1  
HOXA6  
ERLIN1  
MRPL19  
PTGES  
S100A16  
PRR11  
FRRS1  
USP54  
ZWINT  
DPP3  
AC021876.1  
UCA1  
ARF4  
RASA1  
NAPG  
IFI27  
CCNB1  
SEMA3C  
GBP6  
ERBIN  
MSL3P1  
RAP2B  
RASEF  
PKP3  
INTS13  
MRPS35  
RIPK2  
OCLN

---

---

CKS1B  
KRT7  
XDH  
CBFB  
OASL  
MTDH  
USP14  
LY6E-DT  
PCSK6  
DYNLT3  
RNF39  
SH3TC2  
RLF  
SRFBP1  
KDM2A  
ATP13A3  
KLF7  
SERINC3  
KHNYN  
TMCC1  
GINS1  
EXOC1  
TNFRSF12A  
ANXA2  
TAP1  
OLA1  
RCC2  
AL590723.1  
TRIM29  
UBE2K  
PRR13P5  
PRSS22  
CPNE8  
GNAI3  
MPHOSPH6  
GALK2  
TANC1  
GREB1L  
BROX  
F11R  
LDLR  
BMPR2  
EMB  
UBE2C

---

---

STEAP1  
FAM83H  
DNTTIP1  
RRAS  
DARS  
CDYL  
SLC20A1  
SPAG1  
FAR1  
TSPAN5  
TMEM182  
KHDRBS1  
YARS  
PNPT1  
LNPK  
PRKAA1  
WWP1  
KIF15  
TWF1  
TCEA1P2  
AC112777.1  
UBE2V1  
TRAF3IP1  
AL133370.1  
KRT80  
P4HA1  
UBE2E3  
HK1  
WEE1  
BOLA2-SMG1P6  
GART  
HNRNPR  
OGFOD1  
KNOP1  
TROVE2  
USP10  
MBOAT1  
RN7SKP116  
TRIM5  
EML4  
RND3  
ELOVL6  
APLP2  
OTUD6B

---



---

NAA15  
AC013410.2  
IFIH1  
TMEM43  
MICAL2  
MAPK14  
PKP2  
MTX1P1  
XYLB  
RP2  
HMGA1P1  
TUFT1  
DPY19L1  
EIF2S1  
RNF2  
DR1  
MAML2  
SPTBN2  
AL606489.1  
LPCAT2  
SMARCC1  
OPA1  
GPR39  
SLC44A1  
DARS2  
RCC1  
SLMAP  
PICALM  
SFXN3  
SH3GLB1  
ABHD17C  
NT5E  
GSPT1  
GULP1  
NEDD1  
RAD51AP1  
SPIN4  
AL590666.2  
GBP3  
GMPS  
SERTAD2  
NFAT5  
RAD18  
ROCK2

---

---

CNOT1  
MRPS10  
MUC17  
MFSD9  
TTK  
AL049555.1  
LINC02014  
KDM3A  
RBM41  
FSCN1  
SLAIN2  
ITGB1  
RHBDF1  
GALNT10  
ZNF488  
CLDN4  
OXR1  
ATP5MC1P6  
NUDCD1  
KIF2C  
CDC20  
PSMC6  
ITGB8  
TINAGL1  
ABCC1  
MROH6  
UHMK1  
DIAPH3  
E2F8  
SLC13A5  
WDR44  
E2F3  
WDR26  
C1GALT1  
LGALS3  
FANCA  
LRRFIP1  
KBTBD2  
B3GNT3  
SGO2  
TTYH3  
CSNK1A1  
BHLHE40  
FERMT1

---

---

PLEKHN1  
REST  
CCNA2  
PLCB3  
RAP2C  
SLC39A10  
NUP98  
EPHA4  
PSMD14  
TNFRSF10A  
XRCC5  
PMM2  
GNA15  
OLA1P1  
ESYT2  
YWHAB  
KPNA7  
VRK2  
C6orf132  
C3orf52  
UXS1  
HIST1H3H  
PAQR4  
SP100  
MIR196A1  
S100A10  
ABI1  
LINC02041  
KLF6  
KNTC1  
C6orf106  
MKI67  
AC003965.2  
MIR4653  
CLDN12  
DLG5  
PRR15  
AC007785.1  
CGAS  
PRMT3  
FAM91A1  
C19orf33  
SH3RF1  
HOXB9

---

---

PPP1R3B  
NIPA2  
ANKRD50  
PATJ  
ARAP2  
ESPN  
SYPL1  
ACSL5  
TANK  
ATAD1  
DTX3L  
NUMB  
U2SURP  
DLAT  
SOX4  
LSM12  
NCEH1  
HNRNPLL  
MPP5  
AZIN1  
PLCD3  
NDC1  
JPT2  
ELOVL1  
TFAP2A  
N4BP1  
UTP4  
NUSAP1  
CLDN1  
FARP2  
PRC1  
FHL2  
CKLF-CMTM1  
TMEM41B  
LINC02577  
TNIK  
PLK1  
PDHX  
DUSP6  
LANCL3  
HOXB-AS4  
IQGAP3  
RAP1B  
MGLL

---

---

COQ10B  
IRF6  
PYGB  
CDH1  
TMTC2  
TJP1  
VDAC1  
ITGB4  
OAS1  
MYO1E  
ARL6IP1  
CAPZA1  
RRM2  
XKR9  
EXOC6B  
ZDHHC9  
SMAD3  
PUM1  
TMEM105  
PELI1  
HPS3  
NAA50  
IQANK1  
WDHD1  
HIST1H2BC  
DDX60  
LSM12P1  
LRRC8E  
PTPRF  
RYK  
RNA5SP18  
CMTM1  
MTHFD1  
NPC1  
STK39  
HIST1H2BK  
DTL  
GTF2H3  
AC026877.1  
ZFP91  
SPRED1  
HTATIP2  
VASP  
TFG

---

---

AC007663.2

CELSR1

TJP2

HELLS

PLAUR

DNAH3

PRIM2

RHBDD1

KRT18P28

RNASEH1

AC009237.3

ARCN1

TSPAN1

CARS

YY1

BCL2L1

RNU7-143P

UTP25

DNAJC13

PHLDA1

MINDY2

AURKA

VPS26A

BZW2

PLEC

EPB41L1

DSG2

CYB5B

ZNF267

DEPDC1

MST1R

P2RY2

TMEM87B

ITPRID2

PPFIBP1

YWHAZP3

GRHL2

TAF1B

PDIA6

PPP3R1

PXN

DDX21

GPATCH2

LYPLA1

---

---

C1orf112  
YWHAZP6  
ZW10  
ITGAV  
ITCH  
GAN  
ADAM17  
ZNF525  
MTMR2  
SDC4  
KIAA1522  
METAP1  
PTMA  
RHBDL2  
SPTBN1  
DCUN1D1  
AC099850.3  
WDR43  
PRRC2C  
YWHAG  
TSG101  
RNF149  
AGFG1  
TRERF1  
IQGAP1  
IGFL2-AS1  
JAG1  
NDFIP2  
MYL12A  
SKIL  
PGK1  
STAMBP  
PDCD6IP  
TMEM41A  
BFAR  
TLL5  
AHNAK  
TRAF7  
AC078923.1  
MGAT4B  
CGN  
ZDHHC3  
SPTLC1  
HDGF

---

---

CSTF2  
EIF5A2  
TEAD3  
HERC4  
TRIP12  
ZNF28  
TCF7L2  
AC007128.1  
TGIF1  
ANXA3  
PANX1  
MOB4  
IGFL1P1  
EZR  
SLC16A1  
SMNDC1  
COL6A4P1  
AC124947.2  
MYD88  
FAT1  
LIN9  
ANTXR2  
MSH2  
RAB1A  
HACD2  
MYH14  
AFAP1  
SGMS2  
KITLG  
GCC2  
YAP1  
CASK  
CTTN  
C16orf87  
CDK1  
MOB1A  
FRMD5  
BCAR3  
CENPE  
RBM7  
MELK  
GORASP2  
SFN  
TMEM185B

---



---

NUDT21  
VCL  
CENPN  
CIP2A  
TP53BP2  
TMEM87A  
TSC22D2  
KCMF1  
HOXA13  
PLAG1  
GPSM2  
MUC4  
STYK1  
MTRF1  
B4GALT5  
RAC1  
FBXO28  
NCL  
ZNF1  
PIAS3  
DYNC1I2  
EREG  
HIST1H4H  
PLA2R1  
KLF5  
AK4  
BARD1  
SEPT10  
GPRC5A  
PRICKLE3  
JRKL  
ITPRIPL2  
ETV3  
RIF1  
DHX15  
HCAR1  
EIF2AK2  
GJB5  
TMPRSS4  
LCOR  
TET3  
FMN1  
KCNN4  
FOXQ1

---

---

AC008440.3  
ITGB6  
CDK2  
PDLIM5  
SPICE1  
ESRP1  
STIL  
RNF168  
RASAL2  
AK4P1  
EPS8  
BAIAP2L1  
RALBP1  
CTNNB1  
ARHGAP11A  
KCNK1  
PRMT5  
AC103702.2  
GSKIP  
SLC35F2  
NT5C2  
SDR16C5  
BRCC3  
LY75  
SP3  
HRH1  
ADAM10  
CDA  
ABALON  
CBX3  
IARS2  
SPDL1  
DKK1  
RHOF  
KNL1  
TNS4  
NCK1  
FBXO34  
AIDA  
MAP4K4  
PTK6  
RAB22A  
PLS1  
CAP1

---

---

ARHGAP21  
CENPI  
ANXA2P2  
SLC30A6  
POF1B  
CCNK  
RACGAP1  
STK26  
DUSP11  
ZDHHC7  
SLC35F5  
PIP4K2C  
SUN1  
HMMR  
SLC35A2  
OPN3  
SLC5A3  
MAPK6  
EPHB4  
PHF6  
KIF20B  
EGFR  
UHRF1  
HNRNPF  
PGM2  
XPO1  
RMND5A  
FAM3C  
TES  
TPM3  
PLA2G16  
BUB1B  
DDX18  
SPTLC2  
BAK1  
PERP  
KIF4A  
TMBIM1  
PALB2  
MMADHC  
AL137782.1  
FAM3C2  
NHS  
CCNYL1

---

---

BCL9L  
LMNB1  
ANKIB1  
CDCA8  
RALA  
MBOAT2  
ATL2  
SSB  
STK24  
HIST1H2AI  
CTNNA1  
AL627402.1  
PSMD1  
CTTNBP2NL  
DIAPH2  
LACTB2  
KIF11  
ZNF185  
COPB1  
STK38L  
SPOPL  
CKAP5  
FZD6  
FNDC3B  
LAMB3  
AC063952.1  
CASP8  
PCDH7  
MAL2  
SP1  
KIF23  
CDK6  
CAPN1  
BAZ1A  
ZNF143  
TAF1A  
B3GNT2  
PPARG  
INAVA  
EIF4G1  
SLC2A10  
OAS3  
KIF20A  
CHML

---

---

INCENP  
MIR4713HG  
RNU2-27P  
BZW1  
OSBPL10  
AC007128.2  
ANO1  
ABTB2  
WDFY1  
ARL5B  
SOWAHC  
MXD1  
CDC73  
COL17A1  
G2E3  
FOXL1  
RCOR1  
ACTR3  
ACBD3  
LDHA  
E2F7  
TBL1XR1  
CKAP2L  
CEP55  
CMTM6  
PTBP3  
HEATR1  
UGT1A10  
PLEK2  
BLZF1  
PPP3CA  
ATP11B  
INSIG2  
DIAPH1  
SMC4  
NMI  
HIST1H2BD  
NIPAL1  
AMMECR1  
LMO7  
RAB5A  
ATG16L1  
FAM83B  
YWHAZP2

---

---

TPX2  
KPNA4  
NCKAP1  
BCL10  
CAPN2  
PARP4  
SLC25A43  
ARHGAP5  
ELF4  
SPRED2  
OVOL1  
ARF6  
STK3  
PAK2  
KLF3  
TMEM241  
ACTR2  
ITGA3  
ZC3H15  
VEZT  
NIP7  
SNX6  
HOXA10  
LAMC2  
HJURP  
IRAK2  
AC106900.2  
TMEM123  
LINC00941  
GALNT3  
AMIGO2  
NMD3  
PCDH1  
TNFRSF21  
EPPK1  
ALMS1-IT1  
ZNF146  
PSMA6  
ARHGAP42  
MAP4K3  
YWHAZP4  
CENPF  
RAB6A  
BUB1

---

---

PLEKHA7  
SPATS2L  
AJUBA  
CRYBG2  
ASPM  
RHPN2  
PKN2  
BACH1  
PDCD10  
TMC7  
PATL1  
SLC35A3  
NRAS  
LIPH  
AHR  
PGM2L1  
TUBA1C  
LRRC1  
UBA6  
KCTD5  
HK2  
AVL9  
SLK  
CAST  
IPO7  
UEVLD  
PSEN1  
ADGRG6  
PAWR  
CHMP2B  
SMURF1  
PSMD7  
NEK2  
AP1S3  
IL1RAP  
CD109  
NET1  
SLC30A1  
MALL  
PPP4R1  
OSBPL3  
PEX13  
EPHA2  
ARNTL2

---

---

HMGA1  
NDE1  
PRRG1  
OXSR1  
YWHAZP5  
REEP3  
STAU1  
LASP1  
TOP1  
NEK7  
SAMD9  
AC015660.1  
SKAP2  
TOP2A  
DLGAP5  
ZDHHC5  
RAB10  
STRN  
IRS1  
ARHGAP32  
ZNF217  
RALB  
ARL6IP6  
RPE  
INPP4B  
ITPR3  
CTNND1  
RIOK3  
YES1  
TAX1BP1  
VPS35  
PARD6B  
SINHCAF  
ADSS  
PRKCI  
SRPK1  
KIF18A  
ATP2C1  
TGFA  
ACTL6A  
ASPH  
ERO1A  
HMGA2  
NAB1

---



---

CAB39  
ADAM9  
EFNB2  
GALNT5  
GJB3  
YWHAZ  
LAMA3  
PRPF40A  
TMOD3  
BTBD10  
FLNB  
B3GNT5  
ZDHHC20  
PIK3CB  
CNNM4  
MET  
KDM5B  
SPTY2D1  
GPD2  
ANLN  
CDCP1  
AHNAK2  
ADGRF4  
KRAS  
KIF14  
AGPS  
GJB4  
PRELID3B  
ITGA6  
ASAP2  
IGF2BP2  
CAPRIN1  
MACC1  
CD2AP  
SERPINB5  
MYOF  
SLC2A1  
CDH3  
ITGA2  
ECT2  
PTPN12  
NFE2L3  
ACTN4  
SLC25A24

---

---

|             |          |
|-------------|----------|
| TLDC1       |          |
| FGD6        |          |
| SAT2        | Negative |
| C22orf39    |          |
| CYB5D2      |          |
| ZSCAN16-AS1 |          |
| GKAP1       |          |
| R3HCC1      |          |
| AC012146.1  |          |
| AC023509.4  |          |
| AC026979.2  |          |
| AC025181.2  |          |
| CIRBP       |          |
| FMC1        |          |
| EGFL7       |          |
| ABHD14A     |          |
| SEC11C      |          |
| AC068473.5  |          |
| SNHG9       |          |
| PRADC1      |          |
| GNG7        |          |
| SMIM27      |          |
| SMDT1       |          |
| LYRM9       |          |
| AC008443.4  |          |
| MRM3        |          |
| GAMT        |          |
| CLU         |          |
| ATP5F1A     |          |
| FGF14-AS2   |          |
| SLC2A11     |          |
| PITPNA-AS1  |          |
| AL353743.1  |          |
| KLHL22      |          |
| AP002360.1  |          |
| AL121601.1  |          |
| SMARCD3     |          |
| AC104825.1  |          |
| AC068338.2  |          |
| FAM69B      |          |
| CXXC1       |          |
| TMEM88      |          |
| AC027644.3  |          |
| AF274858.1  |          |

---

---

AC007114.1  
SSR4  
AP004609.3  
ELAC1  
AP000757.1  
ACAT1  
ILF3-DT  
ZNF236-DT  
TSPAN7  
SYNGR1  
BEX5  
AC100810.1  
CLEC3B  
AL691432.2  
HEIH  
DIRAS1  
FKBP11  
AC133552.5  
RAB11B-AS1  
USHBP1  
ATOH8  
RPL3  
EXOC3-AS1  
INPP5K  
EPHX2  
CERS4  
RIC3  
FLJ38576  
NDUFAF8  
BEX2  
GADD45G  
RWDD2A  
AC068338.3  
AL118558.4  
THAP7  
OTUD7A  
AC139530.1  
AL121929.2  
AL162377.1  
PPP6R2  
NAGLU  
RSAD1  
ARIH2OS  
AC233723.2

---

---

LY6G5C  
GTSE1-DT  
RAMP2  
KCNK3  
ANKRD54  
AC004825.2  
AC142472.1  
AC036176.1  
BEND5  
ECHDC3  
PHPT1  
BEX1  
RASIP1  
AC006449.6  
LINC00909  
BEX4  
GALNT16  
GS1-124K5.4  
CDIP1  
TSPAN33  
MRPL54  
HMGN3  
DNAJC28  
RNF167  
AF131215.7  
AC104986.2  
AC091271.1  
FXVD2  
AC027575.2  
CNNM3-DT  
UBE2D4  
ZNF540  
AC090617.5  
AC026471.2  
AC024075.2  
SNHG19  
AP001160.3  
NT5C3B  
MROH8  
CDC37L1-DT  
FUND2  
DGCR6L  
MED9  
OLFM1

---

---

SLC25A5-AS1  
ZNF775  
AC156455.1  
TRIM52-AS1  
AC095057.3  
AC069120.1  
AL035701.1  
HDHD5-AS1  
ZSWIM7  
AC072061.1  
AP000892.2  
CDPF1  
NUDT18  
APLP1  
RPARP-AS1  
KDM8  
AC006942.1  
SAYSD1  
SIL1  
KLKB1  
FLJ37453  
NPM2  
AC106795.2  
RASSF8-AS1  
MSI1  
ZNF793-AS1  
QRICH2  
NAA38  
TMEM121B  
CHST10  
SPRN  
LINC01023  
COPRS  
AC000068.2  
POMT1  
DCTN3  
SNTG2  
RNASEH2C  
AC087071.1  
NRL  
UCK1  
CFAP410  
AC009560.1  
CBX7

---

---

NENF  
AL513165.1  
PTPRS  
C1orf56  
SLC25A11  
HLF  
RANGRF  
AL118558.3  
SCAMP1-AS1  
CAMK2N2  
RAMP3  
USP20  
SNAP25  
TIMM22  
AL355472.1  
FAM110D  
BRWD1-AS2  
CLDN5  
ELP5  
COX4I2  
INTS10  
RAB26  
TBKBP1  
ZNF582  
AL136304.1  
PDZD4  
SHPK  
TXNL4A  
COQ8A  
ATP6V0E2  
FAM167B  
ENHO  
TCEAL2  
DPP7  
VAMP2  
VASH1-AS1  
AC074032.1  
AL135925.1  
TMEM198  
PELP1  
KANK3  
AC124319.3  
MIR3682  
COQ10A

---

---

AC000068.1  
AC129507.2  
LINC01431  
GSTA4  
TLE2  
NT5M  
SOX18  
RPS20P22  
CERK  
COA3  
GPR162  
YTHDF3-AS1  
AC127024.5  
USP2  
SLC16A11  
NPR1  
DNAJC30  
NEURL1  
MAPK8IP1  
AC120049.1  
RN7SL832P  
AC073508.3  
RGN  
AC002470.1  
AL354920.1  
GRIK5  
RBP7  
DANCR  
LINC02447  
CAHM  
AC104113.1  
FBXO25  
MTERF2  
PMM1  
ACACB  
SLC29A4  
PTP4A3  
AC138207.3  
ATP1B2  
GSTZ1  
AC079174.2  
LRP3  
RPL17  
DUSP26

---

---

OGDHL  
LIPE-AS1  
AC079848.1  
C6orf226  
CACNB2  
ENAM  
RPL3P4  
RTN4RL1  
ZNF554  
AC127024.6  
HEXDC  
AC026304.1  
AC116614.1  
ST6GALNAC6  
NAP1L2  
CCM2L  
NAT8L  
ZNF667-AS1  
AC084036.1  
VTN  
AC009118.3  
FBF1  
BX649632.1  
C15orf61  
ZNF710-AS1  
SOCS2-AS1  
CCDC106  
CD320  
RCAN2  
NEIL2  
AC040169.1  
AL442663.3  
SH2D3C  
AL022328.4  
AC098484.2  
FAM184A  
ATP6V0E2-AS1  
FGFBP3  
AC007541.1  
AC010531.6  
RASD1  
AC100793.4  
ABCA5  
AC002059.1

---



---

AC093591.2  
SNHG25  
AL023806.1  
AC139768.1  
CYFIP2  
FBXO10  
NRIP2  
MOCS2  
SMIM4  
LINC00476  
AL662844.4  
MOCS1  
AL049796.1  
MED14OS  
AC064807.2  
STK33  
SDK1  
BORCS6  
SLC6A16  
C3orf62  
PKIG  
RPH3AL  
ZNF835  
SYP  
AC022916.1  
SLC26A11  
ECSCR  
RNU4-47P  
PRKN  
AC092119.3  
SURF1  
CAMTA1-DT  
KCNJ2-AS1  
WSCD1  
AP000757.2  
NCAM1  
AC099778.1  
SLC22A17  
KCNJ11  
CHADL  
AL080250.1  
RUNDC3A  
CTNND2  
AC008966.1

---

---

DTNA  
AC025162.2  
TBC1D13  
SGF29  
TXNL1  
TMED6  
AC135507.1  
ATP2A3  
NKX2-2  
LINC00957  
AC034236.2  
GRASP  
AF186192.1  
CAMKK1  
AC105020.5  
AC009126.1  
KIAA1324  
AC006511.3  
C2CD4B  
SNPH  
STX8  
AC020910.4  
AC087752.3  
CFD  
DPH1  
KIRREL2  
CACNA2D2  
NDUFV3  
TCEAL3  
SEC61B  
AC048382.5  
AC025449.1  
ZNF667  
AL596244.1  
NPHS1  
KRBA1  
AC015726.1  
CCDC188  
ZNF491  
NME5  
ZNF467  
SLC16A12  
MED11  
AL645728.1

---

---

C18orf21  
FXVD6  
CCDC178  
SCOC-AS1  
AL117332.1  
EPM2A  
GNAZ  
CRIP3  
SCN1B  
AC020765.2  
AL158163.2  
FAM107A  
SERPINA6  
DRC3  
REEP2  
AL358472.2  
CASP17P  
SGSM2  
LINC02001  
HPD  
LINC01750  
AL035071.1  
AC016907.2  
DERL2  
NDUFB2-AS1  
LINC00242  
AL163051.1  
NUCB2  
MAPK11  
AC069224.1  
AC132938.1  
C16orf96  
AC091965.4  
NMNAT3  
PPP1R1A  
ZFP2  
AC009570.1  
PNPLA7  
RASL10B  
DHRS4L1  
SRSF12  
ECSIT  
AC007448.3  
AC012640.2

---

---

SOCS2  
PCSK1N  
KATNAL2  
FAM104B  
AC087521.3  
AL137784.1  
FXVD1  
AP000704.1  
SOX17  
DPM3  
MAGEH1  
MAN1B1-DT  
C1QL1  
TAL1  
ZNF771  
LINC01715  
LINC02106  
AC006033.1  
ACKR1  
FAM117A  
AC026367.1  
ZNF32  
MBD3  
METTL7A  
AL161729.4  
AC064801.1  
PDCD4-AS1  
KLB  
C1QTNF4  
SPTB  
Z97653.1  
PARD6A  
AC034243.1  
LMO3  
FAM229B  
TLL11  
KCNH6  
IPO5P1  
DIRAS3  
RUNDC3B  
ZNF580  
NRG2  
AL355877.1  
AC083880.1

---

---

LINGO4  
TSPOAP1  
AP002360.3  
PACSIN1  
NANOS1  
ERP29  
DNAJC27-AS1  
C16orf89  
G6PC3  
ZNF582-AS1  
MIR497HG  
AL117335.1  
PHYHIPL  
NOVA1  
TMEM44-AS1  
AL109947.1  
MT-TC  
MIR7-3HG  
SCML2  
GPX3  
TMEM72  
AC254562.3  
AL590326.1  
C1QTNF9  
RAB39B  
CH17-340M24.3  
OGFOD3  
AC129507.3  
MTUS2  
AL451085.2  
LINC00092  
ZNF671  
AL121655.1  
LRRC27  
AL109811.3  
HMGN2P15  
Z97989.1  
AC106047.1  
AMZ2P1  
GCAT  
MTURN  
LINC01952  
ACTR3B  
EMID1

---

---

AC092535.1  
HSPC324  
ZBED3  
AL359513.1  
AF186192.2  
GPRIN3  
RTCA-AS1  
AC130343.2  
AL354892.2  
BRSK2  
TCEAL5  
CELF3  
AL121832.2  
AC026150.3  
SCGN  
AC005076.1  
ANKRD16  
USP51  
TDRP  
LINC01315  
AC127070.1  
SH3BGR  
AC073857.1  
CHKB-DT  
SDSL  
MAPK10  
CDO1  
HOGA1  
AL133325.3  
ACSL6  
CCDC28A  
AC084033.3  
LINC01985  
SELENOO  
SNHG8  
AL121583.1  
AC008438.1  
AL021368.3  
AC105020.6  
LONRF2  
AC092535.3  
ZNF781  
TMEM59L  
SMIM10L1

---

---

LINC01353  
NRGN  
RAB3C  
EDA  
SCN3B  
AC046185.2  
SLC25A42  
PAN3-AS1  
AF127577.5  
SLC43A2  
HIGD1B  
PAXBP1-AS1  
AL080317.2  
PEMT  
UQCR11  
AC006369.1  
MAGEE1  
PSPN  
AMER3  
AC068620.2  
ARHGEF15  
YJU2  
AC062017.1  
FAM218A  
ACTL6B  
SPAG7  
TRAM1L1  
AL359504.2  
AF111169.3  
TMCC2  
B4GAT1  
AL133520.1  
MPZ  
PYY2  
SMPD1  
AC006538.1  
INKA1  
AC093503.1  
INA  
RGS11  
QDPR  
MCRIP1  
NAP1L5  
AC011008.2

---

---

DUSP15  
AC126283.1  
AC015917.2  
RAD51C  
PXN-AS1  
AC124016.2  
AL022341.1  
KMT2E-AS1  
PACRG  
LRRC36  
ATP2B1-AS1  
ELMO1  
CAND2  
POLR2J4  
CDH22  
AC092814.1  
ZNF596  
AC097639.1  
MRPL40  
IL3RA  
ALKBH7  
DHRS12  
PEBP4  
AC112184.1  
HRC  
AC026979.3  
APOH  
ATP6V1G2  
PCP4  
U47924.2  
ANGEL1  
IFT20  
AC015961.2  
AQP7  
SEMA6C  
AC110609.1  
AL603910.1  
RTN1  
ANKRD53  
AC016876.1  
GAS2  
JADE1  
AC087500.1  
ROBO4

---



---

LOH12CR2  
TECTA  
AC018413.1  
AC009403.1  
AC021205.3  
FAM155B  
RN7SL521P  
TENT5C  
AMIGO1  
ZFP3  
TRO  
KIF1A  
TSSK1A  
PKNOX2  
C10orf143  
NFASC  
KLHDC9  
LINC01089  
TMOD1  
AC005332.3  
BORCS8  
AC073316.3  
VWA5B2  
AC087500.2  
AC100803.3  
INSM1  
TSPYL2  
LMO2  
IPO9-AS1  
ASB16  
AC128687.2  
APBB1  
AL022068.1  
AC002511.2  
ATPAF2  
PAK3  
FBXL16  
MXD4  
ZNF559  
GNRH2  
AL022329.1  
UNC79  
HFM1  
UBXN8

---

---

CCKBR  
AC099791.2  
U91328.1  
AC092666.2  
AL021707.1  
LHFPL4  
C3orf18  
ZNF688  
AL031775.1  
SLC25A27  
AL162274.2  
UCHL1  
KLF15  
DCT  
FBLL1  
C18orf32  
AC012615.1  
ERO1B  
ST7-AS1  
AC015977.1  
C21orf58  
SERPINI1  
ARSG  
CES4A  
ZMAT1  
POLR3H  
SARDH  
AC108673.3  
AP001972.1  
SYT3  
AC005696.4  
CALY  
YBEY  
ZNF542P  
AC005790.1  
ZNF843  
AC012254.5  
LCN6  
PPP1R3E  
CELF4  
TRMO  
AC068880.4  
LRPAP1  
DMAC1

---

---

INAFM2  
SLC25A34  
SVOP  
FGF12  
AL355480.3  
AP003721.4  
AC023830.3  
SERPINF2  
AOX1  
AL080317.1  
DSCAML1  
KIF26A  
DPP6  
EID2B  
MESP1  
AC005498.3  
EFCC1  
ST8SIA3  
SLC25A4  
AC008610.1  
AC012306.2  
B9D1  
LRFN1  
LINC00683  
PHF24  
NDUFS7  
AC099522.2  
SPECC1L  
ABCC8  
KCNB1  
AC067747.1  
GCDH  
EMCN  
AC004540.2  
PIPOX  
FAM110B  
AC009812.1  
SLC8A3  
AC007686.3  
SESN1  
VLDLR-AS1  
CACNA1H  
AC008035.1  
AC096540.1

---

---

CCDC159  
SUGT1P4-STRA6LP  
HCG14  
AL391069.3  
PAK5  
AC027271.1  
SLC2A8  
TRAF3IP2-AS1  
DKFZp779M0652  
GPS2  
MYRIP  
PQLC1  
KCNJ5  
LINC01481  
WNK3  
QTRT1  
SNAP25-AS1  
PFDN5  
FAM222A  
HPCA  
PELI3  
AP001267.3  
AL358781.2  
AC107952.2  
ZNF232  
FITM1  
LRRC4B  
SLC1A2  
C12orf57  
PPP2R2B  
PRDX4  
NEXMIF  
ZNF658  
MPP2  
MPP1  
AC018926.3  
C19orf25  
RPLP1P6  
ZNF204P  
IGLL3P  
RN7SL336P  
FDX2  
ZNF414  
GABRB3

---

---

ITFG2-AS1  
OAZ2  
CHMP6  
PTGDR2  
PLAC9  
LINC01003  
GJA4  
CHRNA2  
ABHD8  
SNRPN  
SNAP91  
BNIP1  
PSMG3-AS1  
AL157996.1  
NUDT9  
AC064807.4  
IFFO1  
AC026367.3  
PCBP3  
HCN2  
AL442128.2  
ASPSCR1  
OLFM2  
CORT  
SSTR3  
CDK5R2  
MIR583HG  
Z95115.1  
SHC2  
SERP2  
CNKSR2  
AC008808.2  
AL353708.1  
PEBP1  
RND2  
AC012511.1  
AC008629.1  
VIPR2  
C9orf147  
PAICSP1  
TAGLN3  
RPL6  
AC025175.1  
ANKRD7

---

---

INKA2  
RLN2  
CTTNBP2  
DCXR  
AC138207.5  
ATP5F1D  
AL391807.1  
PTGES3P2  
RGS9  
ADGRL1  
AL355297.4  
AL136295.6  
ESS2  
KIZ  
MAPK8IP2  
TMEM179  
ETV2  
SLC8A2  
LINC00271  
FMN2  
GC  
AC099568.2  
IZUMO4  
ST6GALNAC4  
VEGFD  
AC004895.1  
GRIA2  
PNMA8A  
CCL14  
ZNF594  
AC005899.7  
HAAO  
AC051619.5  
SALL2  
NRTN  
TMEM63C  
AL133343.2  
AC005920.3  
SERGEF  
DSCR9  
ADGRB3  
AC116913.1  
AL162231.1  
GNAO1

---

---

PNMA8B  
SLC48A1  
CRTC1  
GRK4  
CACNA1A  
FITM2  
AC087392.5  
CHST9  
SSBP4  
SCG3  
MBLAC1  
RIPPLY2  
GPRASP1  
ELP2  
IL6R-AS1  
PNMA3  
CLGN  
THA1P  
AC007066.2  
AP000255.1  
AL031666.1  
NKX6-1  
AC080013.5  
AP001972.5  
AL138762.1  
GSTM2  
LIFR-AS1  
NDUFA6-DT  
ZGLP1  
ZNF778  
TNS2  
SLC38A10  
FBXO9  
AL158071.2  
AC026691.1  
ADCY5  
ZDHHC15  
PSTK  
ADARB2  
GYPC  
DUS3L  
AC093249.6  
SOBP  
ZNF18

---

---

SPTBN4  
CPB2-AS1  
AL158163.1  
AL157813.1  
KCNMB2  
AC007220.1  
FFAR3  
KCNA5  
KIF12  
GPR150  
BSNDP2  
AC009113.1  
AL031665.2  
CA4  
AC012313.2  
AL161729.3  
SCAMP5  
COPS3  
FAR2P2  
TMEM175  
ZNF428  
AC003035.1  
SYT4  
AP001627.1  
XKR7  
AC023632.2  
NCALD  
BCL11A  
PTPRN  
RAMP2-AS1  
AL035563.1  
LTC4S  
AC009506.1  
FGF17  
AL158063.1  
METTL16  
CTNS  
SLC7A2  
ARVCF  
SOD3  
GHRL  
ZNF674-AS1  
MLYCD  
AC005498.2

---



---

LINC01144  
BSN  
TMEM255B  
AL390067.1  
DLGAP3  
AC096733.2  
SLC25A18  
AC011445.2  
SDF2L1  
TMEM132C  
CRAT  
AP3B2  
HRAT5  
C3orf33  
AC007666.1  
AC009088.1  
ITGAE  
AL451085.1  
AC008403.3  
AP005131.7  
PGBD5  
PRRT1  
SH3GL2  
FYB2  
AL583856.2  
LINC02202  
URB1-AS1  
AC005837.1  
AC004696.1  
BCAM  
AC005785.1  
AP003392.6  
AC008115.4  
RNU6-8  
SAFB2  
BRF1  
AC022098.4  
AC008543.1  
AC005229.4  
SPATA41  
SEMA3G  
LINC01942  
ELAVL4  
AC026801.2

---

---

AC104985.2  
SLC39A3  
EVL  
RPL17P36  
NIFK-AS1  
AC002398.2  
TRMU  
ZNF853  
CYP51A1-AS1  
AL137002.1  
ZBED3-AS1  
CYP4F32P  
AL049612.1  
C19orf73  
FAM180B  
AC026150.2  
GCK  
AC138207.8  
FAM167A  
ARMC5  
BLMH  
NSG2  
AC107375.1  
MDP1  
BTBD6  
LINC02361  
RGMB-AS1  
AC010501.1  
C1orf127  
CCDC92B  
UNC80  
FXN  
ZNF483  
CXXC4  
ARX  
LRMDA  
LCMT1-AS1  
LINC01531  
ZSCAN18  
AC007663.3  
AP001486.2  
AC233976.1  
RNF212  
AC016582.3

---

---

AC063948.1  
ICA1L  
AL355803.1  
CYP46A1  
HIRIP3  
SEPSECS-AS1  
CPLX2  
AL136531.1  
AC011511.1  
MHENCR  
AC009163.6  
F10  
AL022332.1  
SCD5  
AC005393.1  
CLEC14A  
CASKIN2  
AC093642.2  
TACR1  
AP001412.1  
POMC  
SHANK3  
AC007950.2  
AC016924.1  
HMGCLL1  
A1BG-AS1  
AL138966.2  
AC010999.2  
MMRN1  
ASB14  
AQP4  
AC005034.4  
SMAD4  
AC007292.1  
AC009309.1  
AC010226.1  
MBOAT4  
CNIH2  
POLI  
TDRD10  
H1FX-AS1  
KCNJ8  
AC019131.2  
THSD1

---

---

AL596442.2  
ATRNL1  
AC037459.2  
NTRK2  
AC097359.1  
AC091825.1  
RIMBP2  
SIRT4  
SPART-AS1  
AL390208.1  
FO393419.3  
CASTOR3  
AL358072.1  
MNX1-AS2  
RASA4  
AL139353.1  
AC005224.1  
DHRS4L2  
GABARAP  
AL645940.1  
AL135744.1  
PHACTR1  
PKMP3  
NIPSNAP3B  
NR0B1  
GIMAP1  
PSD  
AC002511.1  
WDR83  
AL512625.1  
AC125494.2  
HDHD2  
RPL34  
LRRC2  
CDADC1  
AC044849.1  
AC008494.1  
OXLD1  
KIAA0319  
AC079089.1  
IL11RA  
AC091153.3  
MINCR  
PLPPR1

---

---

FAM189A1  
SURF2  
NDUFB2  
AP002360.2  
LINC00900  
AC002451.1  
MEG9  
CPEB1  
FAM228B  
SRRM3  
FRRS1L  
XPA  
LINC00484  
Z69706.1  
ZC3H10  
AC097461.1  
AC093635.1  
MIF4GD  
FBXL15  
RFX6  
SV2B  
AC012603.1  
AC012158.1  
RADIL  
RFXAP  
NRCAM  
BCDIN3D-AS1  
ZNF503-AS2  
AC016876.3  
AC137767.1  
PRKAG2-AS1  
SKIDA1  
SCG2  
RPL21  
ARRDC1-AS1  
AC034198.2  
ZNF821  
AC108134.4  
DPY19L2P4  
IQSEC3  
AC103736.1  
KIF5A  
VLDLR  
C16orf86

---

---

GDAP1L1  
SRP14-AS1  
KCTD2  
ROM1  
AC074044.1  
AL353719.1  
RPSAP9  
AL023803.1  
AL157935.2  
GNG11  
AC027682.6  
UCN3  
NUAK2  
OAZ1  
ZCCHC18  
LINC01534  
EFR3B  
AC011933.3  
PPM1E  
CDK9  
AC015802.5  
PWAR6  
FKBP2  
MTMR7  
AC005225.4  
C17orf107  
AC023421.1  
SLC12A5-AS1  
ECI2  
PANO1  
CRMP1  
ITGA7  
POU6F1  
TOR2A  
TUNAR  
MT-TL2  
ARHGEF26  
AP005205.2  
WIPF3  
TMEM254-AS1  
AL008582.1  
AC015819.1  
AC022413.1  
RTL5

---

---

WDR83OS  
AC027279.1  
LINC01816  
NDUFA11  
NOL4  
C9orf43  
SNHG7  
INSYN1  
BX649601.1  
AL133353.1  
DDT  
C5orf38  
SNRNP25  
NUPR2  
XKR4  
TSTD3  
BEX3  
NIM1K  
C19orf81  
SGMS1-AS1  
KIF6  
SEZ6  
ZNF433-AS1  
LINC02044  
C9orf139  
AC011477.1  
TTLL7  
COMTD1  
AL596202.1  
KCNK17  
LINC00602  
AC083798.2  
AC106795.5  
LINC01484  
CXorf57  
ALKBH5  
RASSF1-AS1  
ESRRG  
PAH  
CTSF  
GRIA3  
NRSN2  
AL391834.2  
ISCU

---

---

SNHG20  
KCNH2  
EEF1DP4  
ANK2  
AF131216.4  
AL355377.2  
RBM26-AS1  
COQ4  
C6orf163  
DICER1-AS1  
CFAP70  
AL391261.4  
AC007495.1  
METRN  
ACSM6  
EBF4  
HS6ST3  
PDCL3P4  
TPST2  
MYT1  
SFTPD  
LRRN3  
ABHD17A  
CD81  
A2M-AS1  
CDKN2AIPNL  
AC005329.1  
NRXN1  
ZNF602P  
PLVAP  
AC104333.3  
AC021242.3  
AC079331.2  
AC092437.1  
NUTM2B  
ASTN1  
AL139274.2  
LINC01529  
AC133552.2  
AL139286.2  
ST18  
RPL17P34  
TRMT9B  
SGSM1

---



---

RBM11  
AC018521.5  
BAALC  
LINC01238  
OR7E47P  
PNMA8C  
VGF  
AL118516.1  
PIK3CD-AS2  
PDCD4  
TPGS1  
TMEM170B  
SSTR2  
LINC02147  
NDUFA13  
CTB-178M22.2  
RAB3A  
AC069209.1  
AL008723.3  
AC078925.4  
ZNF10  
GOLGA7B  
AC115223.1  
AZIN1-AS1  
ARHGDIG  
GPLD1  
RPS27P25  
PRRT3  
PRPH  
HINT2  
FBXO15  
AC015909.2  
LINC01424  
FAR2P3  
NECAB2  
ZSCAN1  
ALG14  
NUDT2  
SUZ12P1  
AC091152.4  
LINC01963  
TNRC6C  
AC053527.1  
CADPS

---

---

AC012640.5  
AC005911.1  
AL031658.2  
ASMT  
MRPL34  
NPIPP1  
RNY3P8  
PDK4  
AC120498.10  
A1BG  
SEZ6L  
AL121672.2  
AC026367.2  
FEV  
MIR548AA2  
CBFA2T3  
CAMK2B  
SRR  
AC009974.1  
CLEC1A  
HSD17B14  
ADM5  
AC002347.1  
SNCA  
RPL9P29  
LINC01014  
DBH-AS1  
AC018638.6  
SORCS1  
AC121761.2  
KRT222  
LY6H  
RWDD1  
AP002748.3  
AC103746.1  
AL356740.1  
MTDHP3  
EML6  
TIMM13  
RNASEK-C17orf49  
DDX25  
AC012360.2  
SEC31B  
ANKS1B

---

---

AC013472.3  
PRKAR2B  
AL161421.1  
CRELD2  
UNK  
AC136628.3  
FAM135B  
AC131159.1  
STX17-AS1  
LINC00334  
AC092634.3  
SNTA1  
TMEM121  
AC027682.4  
MMAB  
UNC13A  
AC092535.2  
DSCAM  
SF3B5  
MCOLN1  
TEX38  
ZNF181  
AC138965.3  
DCLK2  
AL136040.1  
AL161452.1  
AC006012.1  
PIK3IP1-AS1  
AC024575.1  
AC134043.2  
PCSK2  
AC005962.1  
CCR10  
CAMTA2  
AC016820.1  
GOLGA8VP  
WDR17  
AC119403.1  
CERS1  
LINC00663  
LINC00987  
AC087501.4  
CD99L2  
FLJ31104

---

---

TAF6L  
AQP1  
CCDC110  
AC004540.1  
NUDT9P1  
AC114271.1  
INTS6-AS1  
ADRA2C  
AL161658.1  
AF131215.6  
RABEP1  
F11  
LINC02193  
RPAIN  
BNIP3  
SLC6A17  
AC010491.1  
NLRP1  
AL358852.1  
AL512408.1  
MAPK4  
ASPDH  
AC011290.1  
OXER1  
CTXND1  
RXRG  
STKLD1  
AC078846.1  
AC079385.3  
AC140481.1  
SORBS2  
SMAD5-AS1  
ERMARD  
TMPRSS6  
AC068888.1  
RPS19BP1  
ARHGEF7-AS2  
HSPB6  
RPS18P9  
ZNF286B  
MAP6  
AP002990.1  
GNB3  
HCST

---

---

AC079414.3  
SNHG14  
AC007687.1  
RPL23AP67  
AC103858.2  
TMEM132D  
ADGRF3  
AC008759.3  
MIR126  
DYNLL2  
UBAP1L  
PDE2A  
REM2  
AC105277.1  
SCN3A  
AJM1  
TMEM178B  
ANAPC2  
GPC5-AS1  
BTBD17  
AC022400.7  
KIF5C  
CFL1P6  
AC010997.3  
GNG2  
SFRP1  
ZDHHC24  
UBXN6  
DNAJC4  
AC114781.2  
AL122008.3  
NRROS  
RNF180  
TOMM7  
AC087294.1  
FLJ37035  
AC138356.2  
AL355001.2  
ATP5PF  
LINC01586  
AC016705.2  
DYRK4  
AC064836.3  
AC022893.2

---

---

STXBP5L  
DPH7  
AL845472.2  
DNAH9  
P2RX1  
KLF2P2  
AL592424.1  
GLS2  
FZD4  
CCDC62  
MED16  
SLC17A1  
AC079140.3  
GTF2IRD2  
SPA17P1  
AC007938.1  
AL450326.2  
CDH10  
S100A1  
LINC00870  
FN3K  
SNCB  
ELOVL4  
DUX4L27  
LINC02600  
NGFR  
WRAP53  
4-Mar  
AC016355.1  
AF186192.3  
AL023881.1  
PRPSAP2  
PGM5P4  
AC005670.1  
PALD1  
LINC01016  
SEPT5  
AC005696.1  
JPH3  
DOCK9-DT  
AC096734.2  
FNDC5  
RBP5  
AL357079.1

---

---

ZEB2-AS1  
CYB561D1  
SUSD4  
HDAC5  
AC008608.2  
ABI3  
TMEM145  
MTMR3  
PGM5P4-AS1  
OSGEPL1-AS1  
MAMLD1  
PCSK1  
STAT4  
VN2R17P  
SLC5A4  
TUBD1  
LINC01927  
DBIL5P  
FAM120C  
AC016575.1  
TPTE2P1  
RNF130  
CD36  
NEURL4  
ITIH4  
AC007029.1  
AC004846.2  
AC005695.3  
TAT-AS1  
S100B  
AP001528.3  
SYT6  
AC021755.3  
CPEB1-AS1  
AC124242.1  
ZNF709  
PSMB6  
AC092134.1  
IRF2BP1  
RAB9B  
MIR600HG  
DPH5  
CPT1C  
ARNT2

---

---

AGBL4  
IRX2  
IRAK1BP1  
MT-ND3  
AC008121.2  
AL671710.1  
SHBG  
AL161911.1  
ZNF625-ZNF20  
LYL1  
ZNF433  
AC020892.2  
PIGBOS1  
AC008280.3  
TBX2-AS1  
FRAT1  
REPIN1  
AC012409.1  
AC117489.1  
C12orf60  
ING5  
SCRN2  
AC073655.2  
MRLN  
CHGB  
KCNN3  
AC010864.1  
ZNF358  
AP001462.1  
NOVA2  
AC009690.1  
WFIKKN1  
AC092802.1  
AL034550.2  
TMEM150C  
AC007485.2  
ASB16-AS1  
NDUFB8  
SDHCP4  
AC002467.1  
AC116407.1  
ENTPD3-AS1  
RPS28  
ZNF213-AS1

---



---

PPP5D1  
STPG3-AS1  
NOP53  
RPGRIP1  
C17orf51  
SETMAR  
AC105339.1  
HYI-AS1  
CARMIL3  
MRPS11  
AC068620.1  
MYH3  
MIR670  
SPACA9  
MAN1C1  
DPH6-DT  
AP000254.1  
LINC01146  
MAST3  
SMIM8  
ZDHHC22  
AL161938.1  
NAXD  
ZNF271P  
AC020558.2  
RTN4IP1  
CACNA2D3  
CACNA1B  
HEXIM2  
AC018647.1  
AC084824.5  
ART3  
ADGRG5  
LINC00643  
KCND3  
AC244035.1  
AC112219.2  
SCARF1  
AP5S1  
AC013356.1  
REM1  
AC106820.3  
NPDC1  
AC010175.1

---

---

CDNF  
AL365194.1  
AL136368.1  
ENO1-AS1  
LINC02148  
GDF9  
SETBP1  
AC125257.1  
DENND2A  
CBLN1  
AC093510.2  
AC010478.1  
SCG5  
CELF5  
CORO2B  
SHISAL2B  
MIR339  
AC012645.1  
CRADD  
AL355472.4  
AC106795.3  
ZNF98  
B4GALNT4  
CCDC13-AS1  
AL356488.3  
CCDC13  
TMEM86B  
HAGH  
GPRASP2  
AL008729.1  
CUTA  
ATCAY  
AL158823.1  
TMEM151A  
AL022328.1  
PCDHB4  
AC106886.4  
SEPT1  
SLC46A1  
AL031963.3  
AP001062.1  
AL133551.1  
AC139495.1  
PCAT19

---

---

AC079766.1  
PRR22  
ZNF71  
ADCY1  
FTOP1  
AC107464.3  
MAPT  
SLIT1  
RPL7A  
GPR142  
FAM186A  
CLEC9A  
SNAI3-AS1  
AL162171.1  
AC025871.2  
AC233723.1  
SLC12A5  
CA11  
GARNL3  
AL139125.2  
RAPGEF4  
CCT6B  
AL731566.2  
AC010969.1  
RPL5P34  
HDAC10  
AC008758.4  
MRPS26  
AC020558.1  
LINC02389  
KSR1  
AL590999.1  
AC067838.1  
RPL21P89  
WASF3  
SMIM10L2A  
AC079630.1  
SLC7A14  
BIVM  
ADD2  
AC104211.1  
UNC119  
AC079322.1  
TP53I13

---

---

MIS18A-AS1  
MATK  
TXN2  
RIIAD1  
MDH1B  
CST3  
RABGEF1  
PRAF2  
AL137230.1  
AL031186.1  
AL138767.3  
AC012510.1  
CCNA1  
KCNA2  
MRO  
MAP3K15  
TMEM151B  
AL390783.1  
AL359258.3  
PPM1K  
AC092720.2  
AC034229.4  
Z93241.1  
SLC6A4  
AL445250.1  
PIAS2  
AC079305.1  
TUBGCP6  
MCOLN3  
TTYH1  
AC104109.2  
LINC02559  
AC126177.7  
SUCLA2-AS1  
AC007192.1  
NEUROD1  
RBMS3-AS3  
SERTM1  
WNT4  
KCNMA1  
HHATL-AS1  
CHGA  
AC084357.2  
AC135050.6

---

---

NKAPL  
AC008669.1  
PHF21B  
AVPR1B  
LINC01829  
AC005154.2  
AC105942.1  
DTX3  
AC245140.1  
FAM163A  
SSPO  
AC022417.1  
AC025271.4  
GZMM  
SNAI3  
AMPH  
AD000864.1  
AC112236.2  
SPPL2B  
SCRT1  
PART1  
SGSH  
KIF19  
HIRA  
NAP1L6  
SPX  
CHST12  
SMC2-AS1  
AC021752.1  
AC244669.2  
AC127070.2  
NUDT7  
CYP2C8  
BBS5  
AC025048.2  
AC015961.1  
AL391261.2  
AC008736.1  
AC007000.1  
SERPINA10  
ALKAL2  
MSRA  
AC006238.1  
AP000802.1

---

---

TCF15  
CTXN2  
AC005775.1  
RN7SL268P  
ZNF429  
AC092574.1  
AC010323.1  
AC010980.1  
RPL26  
GAD2  
AC132872.1  
AJ011932.1  
OSBPL6  
EFCAB6  
SEMA6A-AS1  
ZNF814  
MAP6D1  
JAKMIP1  
GOLGA8N  
PDE1C  
AC100812.1  
TMEM256  
SNX22  
PLCG1-AS1  
LINC02101  
MT-CYB  
FLT4  
UBE2Q2L  
AC091849.2  
PCDHB1  
RANBP3  
LRRTM2  
DNAJC3-DT  
AMHR2  
MPC1  
SARM1  
AC093278.2  
TUBB4A  
ZNF503-AS1  
CRYBA2  
FAM184B  
AL596094.1  
AP001437.1  
STK24-AS1

---

---

RNU4ATAC  
AL133299.1  
AC012254.3  
AC040896.1  
MIATNB  
AL158196.1  
CCDC180  
AC073911.3  
AL158071.3  
PDXP  
ARRB2  
LMF2  
AQP4-AS1  
AC013468.1  
KCNH3  
UQCRB  
CLUL1  
Z69890.1  
TOLLIP-AS1  
ZNF426-DT  
AC008808.1  
ALDH5A1  
DMAP1  
AC010331.1  
TUB  
AC006277.1  
AL589765.1  
ZNF396  
MIR320D1  
AC104985.1  
LINC01574  
GUSBP1  
TNR  
TMEM131L  
APOO  
AC009185.1  
CADM1  
COX6CP13  
SLC14A2-AS1  
AL121899.1  
MKS1  
AL359853.1  
ZNF682  
TSNAXIP1

---

---

EXTL3-AS1  
PBX3  
ANKHD1-EIF4EBP3  
AC092117.1  
LINC01128  
TCEANC  
ULK2  
AC011477.7  
CCDC157  
CADM3  
LINC01465  
SELP  
AL604028.1  
KCNJ16  
WNK2  
LINC01976  
RN7SL73P  
ASPA  
SH3GL3  
ADCK1  
AC022415.1  
AL162419.1  
CAMK1  
AP005671.1  
AL035250.1  
LINC01664  
AL353708.3  
F7  
AC004947.2  
HSD11B1L  
DLG2  
TFEB  
GEMIN7-AS1  
LINC00339  
SPATA45  
GJC3  
CABP7  
CTNNA2  
BRINP2  
AC009630.1  
PINLYP  
SNHG21  
PRR34-AS1  
LINC01695

---



---

AC116003.3  
KIAA1328  
HIPK1-AS1  
AC090948.1  
AL158055.1  
AC011825.4  
F11-AS1  
AOX3P  
AC012254.1  
ADGRD1-AS1  
ARHGEF26-AS1  
AL138960.1  
LGI3  
SHISA7  
MADCAM1  
MTATP6P1  
AC027807.2  
NDUFB7  
JAZF1-AS1  
LINC00261  
PLPP5  
AL031432.3  
PPIEL  
FAM227B  
TUSC1  
HOMER2  
AC104117.3  
AC090114.2  
AL358933.1  
AC009407.1  
CYP4V2  
AC073343.1  
CECR2  
PROX1  
AC004221.1  
RPL5  
SMIM32  
CPA5  
RASA4DP  
MAST1  
CFP  
AL139130.1  
TBC1D24  
AC006116.8

---

---

GPR75  
AC139713.2  
GGA2  
PAX6  
BSN-DT  
LHX6  
C7orf26  
ALB  
AC016590.3  
AC012085.2  
RFPL3S  
SDHAF1  
SETDB2  
EIF1  
AL136295.7  
CISH  
KCNJ6  
AL136038.5  
PLD6  
NEU1  
ST3GAL5-AS1  
CXorf36  
PEX5L  
AL355297.3  
TPPP  
FLT3  
AC063943.1  
AP001636.3  
MKKS  
C2orf40  
TBXA2R  
ZNF76  
AC115284.2  
AC243830.2  
LINC01779  
CATSPERE  
ATP1A3  
OCM  
ACADL  
ASXL3  
AF279873.3  
AC126177.6  
GLIDR  
AC024257.5

---

---

GALT  
AC231981.1  
HDHD5  
MAPK12  
AC116337.3  
TCEA2  
AC107031.1  
AL034374.1  
ZNF862  
PTPRN2  
IGFN1  
FSTL4  
GDF11  
FAM200B  
RN7SL771P  
CCL21  
AC120498.8  
AC100771.2  
ZACN  
AL513534.1  
RALYL  
CATIP  
MBL1P  
GRB14  
AC012629.2  
AC245297.1  
DRAIC  
CCDC141  
AC006254.1  
FAM181B  
RAI2  
AC124045.1  
PIGP  
C21orf62-AS1  
AC004471.2  
GPR146  
PRR26  
AC093206.1  
AC026464.1  
PCDH10  
EID3  
AL022328.2  
AL590787.1  
ERVK9-11

---

---

FFAR1  
NRSN1  
KL  
AC139795.3  
TOGARAM2  
U62317.3  
PICK1  
AC064799.1  
POU6F2-AS1  
SCNN1D  
AL080317.3  
C2orf73  
PARVB  
ZNF157  
RPS3A  
NEBL-AS1  
AL021328.1  
AL357146.1  
AC024580.2  
SLCO5A1  
SYT5  
AC026748.1  
EPHX1  
IRS3P  
ZNF397  
ZNF763  
CBX6  
ZNF79  
MTHFD2L  
ZADH2  
PLCXD2  
CPE  
TIMM21  
CNPY3  
NLGN1  
AC090241.3  
AL359764.1  
AC110285.2  
TENM1  
TVP23C  
RET  
AC104794.4  
P2RY11  
CXorf58

---

---

PAXIP1-AS1  
HDDC2  
LINC01374  
POU6F2  
RPS6  
FOXP2  
AC099521.1  
RSPH9  
DNAJC18  
GRM4  
OTOA  
ZNF583  
SHE  
GPR135  
C1QTNF2  
KHDRBS2  
GNMT  
S100Z  
RASL10A  
C8orf86  
AL031847.1  
GVQW3  
RGS22  
FGL1  
ROGDI  
MIR153-1  
MRPL57  
CETP  
UBAC2-AS1  
WDFY3-AS2  
AL135905.1  
AP000345.2  
AC022107.1  
LRRC10B  
AC013474.1  
AL022476.1  
CXCL12  
CLCNKA  
COPS9  
ZER1  
TMEM74  
AC015802.3  
AC106820.4  
CARTPT

---

---

SLC25A30-AS1  
KCNAB1  
AL020996.1  
AC066612.1  
OXCT1-AS1  
AC024361.1  
GLTPD2  
LRRC4  
KARSP2  
LINC01354  
AC005332.1  
AC008752.2  
LINC01063  
NCOA5  
AC006116.6  
ATP1A1-AS1  
TMEM8B  
SBK2  
GNAL  
LINC01152  
LINC02586  
ZNF625  
LRRC37A5P  
COL26A1  
LYSMD2  
SLC12A1  
AL022069.1  
VPS33B-DT  
AC104123.1  
CNBD2  
JPH4  
TMEM61  
AL161729.1  
KCNB2  
MLXIPL  
HPF1  
GTF2H5  
SLC43A1  
Z93930.3  
AC005696.3  
AL160286.2  
AC012617.1  
ITPR1-DT  
TMEM196

---

---

FAM57B  
SEPHS1P1  
RPL23AP49  
ADAMTSL2  
CRHBP  
AC013460.1  
AP003559.1  
AL391883.1  
CKMT2  
AC145422.1  
HCG2040054  
PLD4  
LNP1  
RGMB  
DZIP1  
AL117336.3  
AC068870.2  
JAM2  
MAST4-AS1  
LINC00644  
ST3GAL3  
SCML4  
AL592494.3  
RPS15AP38  
AL132655.2  
RPL17P43  
ADH1B  
AL442663.4  
THAP7-AS1  
AL356218.1  
AC004263.1  
AL009178.2  
AC135178.5  
LINC02593  
AC008124.1  
FICD  
MEG8  
NDUFA2  
AC009283.1  
MYOZ1  
BX679664.3  
FGF14  
ZC3HC1  
CD34

---

---

AC006116.10  
AC147651.1  
AL353743.3  
RXRA  
AC073896.2  
AC016590.1  
KCNJ6-AS1  
AC006077.2  
AC021755.2  
ASB4  
ACBD4  
C7  
PPP4R4  
AC055758.2  
NPPA  
CTBP2P6  
AC016885.3  
AP000894.4  
FTCD  
ADGRA1  
PCED1A  
DYNC1I1  
ADRB2  
CHST8  
C5  
CCDC28B  
AC114546.1  
UTF1  
AC025682.1  
ZSCAN2  
NATD1  
CYR1  
AC087742.1  
AC012508.2  
AC092296.2  
ISCA1  
TTC41P  
AC107871.2  
ELOVL2  
PIN1  
8-Mar  
LRP2BP  
WASH6P  
ZNF837

---



---

RNU1-132P  
EFNB3  
DPY19L2  
PGBD1  
SYT7  
PAUPAR  
AL354950.1  
ACSM5  
AC007221.1  
MUM1  
MPP6  
AC073896.3  
AP000347.2  
SLC4A8  
AC020928.2  
AC099684.1  
AC226101.1  
AL136162.1  
SLC14A2  
FAHD2B  
MARK1  
MBD1  
AC005682.1  
AP001626.1  
AC005730.2  
CEBPB-AS1  
LRRC37A3  
SEMA6A  
LINC02285  
PLPP1  
LINC00167  
AC087752.4  
PMF1  
AC010359.1  
ZNF660  
AC023509.3  
KCNK16  
AL137784.3  
TRMT10B  
AC069213.1  
LINC01018  
U2AF1L4  
AC009084.2  
AL844908.2

---

---

DNAJC9-AS1  
AC010809.1  
CADM3-AS1  
AGTR1  
CCNT2-AS1  
ZIM2-AS1  
SEPT7P2  
PAIP2B  
PLA2G6  
AC004687.1  
ADPRM  
P2RX5-TAX1BP3  
GIMAP7  
AC091390.4  
AL162412.1  
PRKAR2A-AS1  
GAL3ST3  
TMEM220  
AL035427.1  
MIR762HG  
AC015726.2  
FAM53B  
LINC00612  
SOWAHA  
SYNGR4  
KCTD16  
AC005355.1  
AC011239.2  
LIN7B  
AC007563.1  
AL031595.3  
C6orf203  
ZNF727  
AC109454.2  
PGM5  
AL589765.7  
AC090061.1  
TCP11X1  
AC087457.1  
AC010809.2  
AC007786.1  
PABPC1P7  
OXGR1  
AC055758.1

---

---

REX1BD  
C9orf66  
GPR148  
USP6  
JAKMIP2  
FAM83C-AS1  
AL160270.1  
AL136366.1  
SNAI1P1  
EBF1  
RBM22P2  
AC073573.1  
PRR18  
ST20-AS1  
AC004877.1  
AC124319.2  
EXOC3L1  
UBOX5  
SNTG1  
ACTG1P17  
ZNF22  
PCDHB5  
TEKT3  
AC090425.1  
HS6ST1  
MEG3  
AC106886.1  
MTUS2-AS1  
AC112187.3  
KAT14  
AP001094.1  
NUTM2HP  
AL021937.3  
VPS37D  
AC012313.5  
AC010469.1  
HBA2  
ASIC3  
CYCSP8  
AP003486.1  
GJD2  
ADGRV1  
DZIP3  
PDE8B

---

---

SCX  
SLC1A4  
MIR670HG  
KLLN  
CFAP53  
RPL38  
C11orf71  
F8  
ARHGAP24  
KCNJ3  
MPDU1  
FOCAD-AS1  
AC112204.3  
SLC38A3  
UCHL1-AS1  
ZNF767P  
ADCY4  
C22orf42  
APOBEC2  
AC055822.1  
TTC23L  
PI16  
PTGDS  
AL512604.3  
AC087623.3  
AC104836.1  
THEM4  
GSTA7P  
AC106886.3  
NAP1L3  
RFX3-AS1  
AC018638.7  
SLITRK2  
KCNC1  
VWA8-AS1  
AC123912.2  
AC022098.2  
AL133325.2  
MVB12B  
AC083964.2  
ZNF691  
ZCWPW2  
AF287957.1  
AGBL5-IT1

---

---

AC010201.1  
ARMCX2  
ANAPC16  
PAXX  
SNHG10  
AC069281.1  
ZNF804B  
AC116609.1  
AC011477.2  
BX284668.2  
AL022337.1  
AL161772.1  
NAV2-AS2  
SLC35F1  
UOX  
AC008972.1  
LINC00908  
AGT  
LINC01311  
ANKRD36BP2  
SLC25A6  
COPE  
UBE2QL1  
AC011444.1  
LINC00535  
EDF1  
MIR548AN  
ARL16  
LINC02012  
AL138688.2  
SCARA5  
AC005014.2  
MESTIT1  
ZNF732  
AL356599.1  
TRIM50  
VWC2L  
IER3IP1  
AL136295.2  
ANGPTL5  
TIE1  
PPT2  
AC092691.1  
GSG1

---

---

IDNK  
MYL7  
AC004803.1  
RFESD  
AC089999.2  
DPM2  
AL021878.2  
CECR3  
EIF3LP3  
AC008467.1  
AC008667.2  
AC099343.3  
GTF2IRD2B  
FGB  
AC107032.1  
ZNF653  
SARAF  
PFKFB1  
LINC01625  
AL022069.2  
C21orf62  
UNQ6494  
AC109322.1  
RPL26P6  
CUBN  
AC137630.3  
FRG1-DT  
ACADVL  
SNAPC4  
ATP6V0A1  
UROS  
TBCC  
AL135960.1  
LINC00989  
MGAT4C  
PHBP20  
LINC01160  
AC026992.2  
PLPPR2  
RGS7  
KRT8P43  
AC131097.4  
SV2A  
DNASE1L3

---

---

FGFR1  
SLC25A53  
AC005759.1  
ADGRG2  
AC003102.1  
AC010247.2  
TRIM60P17  
LINC00671  
GRK1  
AC024243.1  
LINC01549  
RNF157-AS1  
AC021549.1  
HAUS7  
MT-CO2  
TXNDC15  
LCN10  
AC112722.1  
TSPAN11  
LINC00844  
LINC02427  
ATPAF1  
RHBDD3  
MT1F  
AC015908.3  
IGFLR1  
LINGO3  
ZNF280B  
TMEM220-AS1  
USP27X  
AL138831.2  
MYCT1  
CFC1  
AP001160.2  
TXNRD2  
AC015656.1  
AC104590.1  
CRYBA1  
AC027348.1  
KLHDC3  
AC007637.1  
AL359198.1  
RPL12P47  
TNNT3

---

---

AC105074.1  
CLYBL  
IMMP1L  
AL022324.2  
HIGD2A  
GPD1  
CD300LG  
KRT27  
RASSF4  
SCAND1  
AC006994.2  
AC063926.1  
TCTA  
APOM  
AC124916.1  
AC008494.3  
GGTA1P  
AGBL3  
AL590705.1  
AC126773.4  
AC107027.1  
CYP4F24P  
PRCD  
KCNN2  
ELN-AS1  
PPP2R3B  
SWSAP1  
LGI2  
MYO16  
AC120024.1  
LETM1P2  
DNAI2  
AC131025.1  
CXorf67  
RNU6-760P  
LGI4  
AC016885.2  
KSR2  
RNF166  
MAP1LC3A  
AL133464.1  
AL359091.4  
AC242842.1  
LINC01562

---



---

C2orf42  
AL136980.1  
AC073464.1  
TAT  
NPAS3  
TSHR  
GFRA2  
RPL7P60  
AC097376.2  
TATDN3  
C1orf122  
FSD2  
C19orf70  
AP001646.3  
KLRG1  
GALNTL6  
AC127024.3  
DTNBP1  
AC093458.2  
AC010980.2  
AC009065.4  
LAMTOR5-AS1  
AL157756.1  
KIF9-AS1  
FCN3  
SATB1-AS1  
DAPL1  
CCL16  
AC087623.1  
AMDHD1  
OSER1-DT  
BX664727.3  
MAP2K6  
RPL21P134  
LINC01284  
PLPP7  
ASCL2  
PPP1R3F  
AL355994.2  
CCER2  
CCDC69  
AC104187.1  
AC008543.5  
SDHAP3

---

---

PISD  
AL845472.1  
AC004854.2  
AL161719.1  
AC114684.1  
LINC02197  
AL583785.1  
LINC02352  
AC087463.1  
TSPOAP1-AS1  
LINC01554  
MCF2L  
AL606970.1  
PPCDC  
FGF12-AS2  
AC104051.2  
RBM20  
AC135983.4  
AC098820.3  
AC055764.2  
IGSF22  
AC018755.3  
NAMA  
AL035420.3  
ACAP1  
AC079610.1  
AC011477.3  
TMEM201  
AC006512.1  
AC104806.2  
AC010326.1  
ZDHHC11B  
AC100847.1  
TP53INP1  
AC010719.1  
AC004449.1  
KLF2P4  
IL17D  
AC129507.1  
AC127002.1  
ACOX2  
ZNF497  
AC022079.2  
BX322562.1

---

---

CLN8  
AC026369.1  
USE1  
CRY2  
ZBTB16  
APBB3  
INTS9  
CADM4  
AC026741.1  
ZNF676  
SYNE1  
SLC9B1  
AL513542.1  
AC107983.1  
POLRMT  
AP003117.1  
AL021707.6  
SERPINE3  
NME9  
AL512652.1  
AC012467.1  
SEC14L5  
LINC01370  
AC104667.1  
SFXN5  
AC135178.1  
CPNE9  
CPQ  
Z97832.2  
HPN  
AL035461.2  
PCYT1B  
AC090587.1  
NDUFA7  
AC011450.1  
AL355102.4  
LINC00868  
AC048351.1  
GLIPR1L2  
TRAPPC1  
C8A  
LINC00315  
AC135983.3  
AL355432.1

---

---

FAM174B  
AL022324.1  
CYP39A1  
NPY5R  
EML5  
AC009318.4  
NDUFB11  
LCNL1  
FEM1A  
KLHL32  
AC001226.1  
KCNG1  
ZNF747  
AC124319.4  
CCDC3  
C17orf100  
EZH1  
VENTX  
Z82206.1  
EFCAB8  
RNF182  
AC040918.1  
AC010327.4  
AL050341.2  
AL133279.1  
RTP5  
ARC  
KLHL10  
PCDH17  
MIR3671  
DEFB124  
AC121338.2  
C14orf180  
CCDC30  
RPL10P11  
TDRD9  
ZBTB48  
AC012360.1  
BATF3  
AC013400.1  
SMTNL2  
RAB11FIP3  
PLIN5  
SLC4A10

---

---

SLC38A4  
AC026803.2  
TMEM221  
ANKRD65  
RPL9P9  
AC136632.1  
DACH1  
GRM6  
AC140847.2  
TMEM271  
RNA5SP103  
AP006222.1  
FAM153C  
AC239367.3  
SELENOM  
AP001363.2  
AC022098.1  
AC040169.2  
AC097537.1  
SLC45A2  
AC091982.3  
BCDIN3D  
AC118553.1  
MST1  
B3GALT1  
RRAGD  
AL450384.2  
FBXW4  
MAT1A  
AC020928.1  
AC123768.3  
WDR91  
AC114341.1  
RLN1  
PRR34  
AC015967.1  
AC008013.2  
SLC25A14  
PATZ1  
HBA1  
SCN4B  
AC010307.4  
AC007349.1  
FLG-AS1

---

---

AL096711.2  
AL391684.1  
B3GAT1  
AL353622.2  
AL009181.1  
AC018845.3  
RNU6-644P  
AP000346.2  
CHRDL1  
AC091925.1  
AC004477.3  
U91328.3  
AC073111.1  
Z83847.1  
LINC02495  
AC097468.1  
ECHDC2  
GOLGA8M  
AC108704.1  
AC010136.1  
PLA2G4C  
GPR61  
SYN1  
PPP1R42  
AC007938.3  
AL731568.1  
AES  
HCFC1-AS1  
MRM1  
AL096816.1  
ATOH7  
ZNF568  
RNU4-14P  
COX7A1  
AC005899.3  
GOLGA8H  
AC005332.5  
MFSD6L  
ATP1A2  
AC243562.2  
CHCHD10  
GAPDHP76  
PTPRT  
AP003774.1

---

---

AC025262.2  
AL592293.1  
ATAD3C  
AP001528.2  
LINC01341  
NRXN2  
AF111167.2  
LCN12  
AC087289.2  
CCDC151  
CAVIN2  
AC068522.1  
LINC00316  
AC091153.1  
AL359317.2  
LPL  
DMGDH  
TVP23A  
AC087289.3  
SEMA6D  
TBC1D10C  
ZNF460-AS1  
MT-TS2  
ADCY10P1  
PCDHA3  
LINC02289  
AL162426.1  
FAM201B  
AC015813.5  
RPSAP70  
AC104785.1  
AC133963.1  
SNORA11  
C3orf49  
AL035696.3  
TRIM9  
AC067750.1  
FHL1  
AC010913.1  
LINC02458  
SELENOKP1  
AP000812.1  
AP001630.1  
AC016773.1

---

---

ALKBH4  
NAT16  
LINC01634  
AC004812.2  
RASL11A  
FLRT1  
FAM20A  
SCN8A  
EPX  
AC113554.1  
LINC02308  
AL590302.2  
AC004148.1  
GPM6B  
AC015977.2  
MIR3936HG  
AC007780.1  
SPATA7  
ARL5C  
HDDC3  
NACAP8  
ZNF831  
SLC23A2  
PCDHA1  
AC084064.1  
AC118757.1  
AC145207.5  
AL513548.3  
AC073195.1  
GABRG2  
DDTL  
AC134682.1  
TSSK6  
AC139749.1  
AL691403.2  
RPL6P27  
PPIAP4  
PCLO  
LINC00412  
LINC00907  
SRCIN1  
LINC00311  
RPL21P28  
AC004012.1

---



---

SIPRI  
AC007881.3  
LINC02572  
RNU1-70P  
SLC27A5  
SIDT2  
LINC01535  
CERS3  
AC051619.6  
IL24  
Z97055.2  
NPW  
BLOC1S1  
AC018926.1  
AC012313.8  
HMGB3P32  
MIR7-3  
TMEM205  
AC106779.1  
AC063926.3  
DMRTC1B  
TBC1D29  
TUSC8  
AP001533.1  
FP325317.1  
LINC01132  
AC068831.5  
LRRTM4  
SNORD104  
HAO1  
AKAIN1  
REC8  
AL583834.1  
AL157788.1  
NPAP1  
AL731557.1  
TMEM80  
AC055876.4  
Z97653.2  
AC005697.1  
AP002812.5  
AC008641.1  
NF2  
CEP112

---

---

MIR135A1  
TEKT2  
OTOGL  
ARHGAP15  
C17orf97  
VEGFB  
PPM1D  
AC092542.1  
AC091167.4  
AL450338.1  
AL662795.2  
ATXN10  
CCDC57  
GRAP2  
AC113615.1  
AC013733.2  
RTBDN  
AQP7P2  
LINC00888  
CLSTN3  
AC135352.1  
IL4  
C12orf10  
FO538757.1  
CLIP3  
EMC10  
SMOC1  
AC008764.6  
TEPSIN  
GOLGA8B  
AC023355.1  
AC005224.3  
LINC02062  
ACYP2  
EXOG  
STXBP5-AS1  
CASP12  
AC112250.2  
RPL3P9  
NDUFC2  
CACNA1D  
AC022211.2  
AC011468.3  
RYR3

---

---

SLC6A13  
MRPL53  
FGA  
AL133216.2  
CLDND2  
CTSG  
AC004148.2  
ANGPTL1  
AC104984.4  
AL022313.4  
AC009102.2  
VPS51  
AC120498.9  
LRRC74A  
AL359921.2  
FAM71F1  
RASAL3  
LINC00368  
AC027559.1  
AC010632.1  
FUT7  
AC005332.6  
NPRL2  
CUTC  
GIMAP8  
LINC01993  
CACNA1C-AS2  
BOLA1  
MT-ND1  
GLUD1P2  
CACNA1G-AS1  
AGAP10P  
FAM131C  
SOAT2  
AC091860.2  
SAXO2  
CTDP1  
AL162574.1  
CHRNA10  
AC007638.2  
RN7SL417P  
GPR155  
SLC37A4  
AC092490.3

---

---

AP006248.3  
MKNK1  
SDHAF2  
TMED11P  
AC009061.2  
ZHX3  
AC141002.1  
PTF1A  
PDCD6IPP2  
BX842568.4  
HAUS1  
ENDOG  
FABP4  
PNLDC1  
RIMBP3C  
AC104072.1  
KLHDC1  
IGHD  
AC004023.1  
TIGD3  
AC010997.4  
AC124657.1  
RASGRP2  
AC010624.1  
PIAS4  
AL137244.1  
AP003110.1  
MIR3936  
SOCS1  
AC120498.3  
ELOF1  
AC127024.2  
LINC00847  
RPL21P75  
TECPR1  
AC129492.5  
AC104063.1  
AC010624.2  
WAC-AS1  
AL451165.2  
AC011444.3  
UNC93B3  
C12orf76  
SENCR

---

---

NISCH  
AL589739.1  
P4HTM  
LINC00864  
LINC01637  
AL645924.1  
P2RY8  
C22orf34  
RPL10P19  
RAB39A  
AC068987.4  
VKORC1  
AC012313.6  
PDZK1  
AL591501.1  
KNDC1  
PM20D1  
SLC5A9  
AC092279.1  
AL645998.1  
TEX264  
AC093462.1  
MMP24  
ZNF571-AS1  
SAMD11  
AC117457.1  
AC079610.3  
MFNG  
BCRP3  
AC107081.1  
AC112243.1  
HBZ  
FAM124A  
MBD3L1  
AC138965.2  
MTCO2P12  
AL157366.1  
SCGB2A1  
AC093458.1  
AP001596.1  
AP001825.1  
TDRG1  
AC010890.1  
AL035706.1

---

---

TUBA3FP  
AC133540.1  
SBSPON  
LINC00563  
CCDC175  
ATXN7L2  
RBM15-AS1  
IGSF11  
TRPM6  
DKFZP434H168  
EPOR  
LINC01679  
TDH  
LINC01736  
TCEAL6  
ADAM29  
LINC00951  
MPV17L  
LRRC8C-DT  
RPS6KA6  
AC034102.5  
SNU13  
AL139275.2  
SMIM19  
LAMA5-AS1  
PALMD  
CACNG2  
AL731684.1  
CCDC25  
SMIM7  
METTL23  
MPPED2  
AC009268.2  
AC005593.1  
AC010422.2  
IFT27  
SCRT2  
SPINK9  
AC107214.2  
AC012513.1  
IGFALS  
TMEM108  
RPS15  
TTC28-AS1

---

---

PRLR  
ALOX12-AS1  
AL138690.1  
FAM66C  
EPB41L4A-AS1  
CNTN5  
FAM171A2  
GAS1RR  
NXF2B  
DCX  
LRRC73  
FZD10-DT  
TUT1  
CXXC4-AS1  
AC239585.2  
DGCR6  
AC104532.1  
CNR1  
AC099689.1  
AC087343.1  
RNU5B-4P  
PHBP7  
AC004597.1  
SCN4A  
FAM21FP  
AL359918.2  
FAM13C  
KCNK12  
COCH  
AMACR  
AC099684.2  
PLGLB1  
AL121782.1  
AC009227.1  
AL050331.1  
AC005005.3  
FAM209B  
LINC00434  
AL035587.1  
RNU6-94P  
AC093591.1  
HRASLS  
AC104561.1  
AL008707.1

---

---

AL606760.1  
GPS1  
GMFG  
NEURL1-AS1  
AL355300.1  
ZNF248  
DHRS7B  
B3GALT2  
ARL2  
DNLZ  
FAM149A  
TRPC4  
AC024361.2  
ADAMTS7P4  
PLCXD3  
AL161935.3  
MYO3A  
AL354809.1  
ELP6  
RIMS2  
KLHL26  
AC009041.2  
MT-CO3  
AL117339.4  
C9orf163  
RPL34-AS1  
GPIHBP1  
AC010536.3  
NXPH4  
AC078864.1  
FAM95B1  
LINC00158  
AC023300.2  
KLHL34  
GRK3  
AC005009.1  
NANOGP1  
TTC21A  
AC012676.4  
COX14  
AF131216.3  
AC103691.1  
RTL9  
CDS2

---



---

HCG17  
AP002414.4  
WDR5  
TTC7B  
MAG  
C10orf62  
PWAR1  
AC062029.1  
CYP1B1-AS1  
LINC00515  
AL353747.2  
FAM229A  
C17orf49  
AL122010.1  
KIAA1324L  
MYBPH  
ZMAT5  
LINC00852  
AL049838.1  
AC016876.2  
DDRK1  
CBY3  
RDH12  
MASP2  
RELN  
LINC01725  
AC084116.1  
KLHL7-DT  
CTD-3080P12.3  
NLK  
MYL4  
LINC01233  
AL354824.1  
SPEG  
RZR2  
AMY2B  
PRAM1  
CTRL  
GLRB  
LINC02388  
STMN3  
ITIH5  
AC004882.1  
FHIT

---

---

RPP25L  
TCP11X2  
CD79B  
S1PR4  
FBRSL1  
LAGE3P1  
AC035140.1  
AP006289.1  
AL157938.2  
ZNF446  
CCDC107  
AP000866.4  
AC008761.3  
RPL9  
RASA4B  
AC005332.4  
GRM1  
PALM  
ZNF493  
CALCB  
TMEM191C  
CBR4  
RPS9  
SREBF2-AS1  
CX3CR1  
CCDC168  
ZNF34  
GFRA3  
LINC00543  
AC012213.4  
GHR  
AC123912.4  
CMA1  
AC083829.1  
AMER2  
AL022328.3  
AL356489.1  
CNRIP1  
AC010883.1  
AL157400.3  
MRPL46  
GOLGA8CP  
RPL12P27  
TMEM91

---

---

DPYSL5  
DHRS4  
PGM5-AS1  
STPG3  
AC090136.3  
DDO  
ADAM33  
FSD1L  
LINC01011  
AL449403.1  
TMEM203  
AC104162.1  
RNU7-171P  
SMIM18  
KRTAP12-1  
AC079140.4  
PDE1B  
MORN4  
TMEM11  
TSPEAR  
ZNF575  
AC009159.3  
MIR4740  
LINC01544  
CA10  
ARMCX4  
AC244517.5  
AC046185.3  
PRSS3P3  
11-Mar  
INCA1  
URGCP-MRPS24  
EFCAB12  
AC005884.1  
ZNF844  
ZKSCAN2  
CA8  
AC004147.4  
AC144652.1  
CLSTN2-AS1  
AC025754.2  
AL390961.3  
GOLGA8IP  
AC009118.2

---

---

AC097641.1  
CNPY2  
LYRM2  
ADAL  
FAM47E  
NCAM1-AS1  
AL353803.2  
TTC39C-AS1  
LIMD1-AS1  
MAGEL2  
FREM1  
ARMH1  
RNU6-346P  
SGTA  
C15orf56  
ADCYAP1  
ECE2  
AQP12B  
DUSP28  
AC011979.1  
C5orf49  
CD200  
MTFR1L  
KIRREL3  
AC006504.1  
TRBV7-1  
ACR  
AC243962.1  
ZC2HC1C  
COL23A1  
AC125494.3  
C6  
RAPGEF4-AS1  
AC004224.1  
RNU6-460P  
ZBTB46  
HSPA1L  
C2orf74  
AC087482.1  
PGPEP1  
AC253536.6  
C7orf50  
LINC02150  
AL109917.1

---

---

RAB24  
PCBP1-AS1  
AP003068.4  
MICU3  
CRYBB1  
RHOXF1  
MON1A  
VWCE  
TANGO2  
DLG4  
CD1D  
PROZ  
LDB2  
AC007391.1  
NUDT14  
CASKIN1  
CBLN4  
EPB41L4A-DT  
TOM1L2  
AL513283.1  
MIR4269  
USP12-AS1  
AC097641.2  
AC068722.2  
LINC02526  
TUBG2  
AC091304.2  
MIR4458HG  
MMP26  
CLCNKB  
TMEM161B-AS1  
ATP8A2  
AC004832.1  
GRM7  
RNU4-62P  
FGGY  
AC005586.1  
AFF3  
AC112204.1  
AC027807.1  
PWRN3  
FLYWCH2  
NSG1  
Z97206.2

---

---

TOMM20L  
SHLD1  
SCRG1  
AL512791.2  
LUC7L  
KBTBD6  
AL049543.1  
PYGM  
AL121658.1  
SPINK2  
ENPP5  
SYT14  
CYSLTR2  
AC055720.2  
C1QBP  
CLPP  
AC097468.2  
ESRRB  
AL360295.1  
AL603839.3  
SCARNA20  
RBPJL  
AC124303.2  
HAGLROS  
EPOP  
CACNA1G  
GPSM1  
TPA  
PEG3  
MYEF2  
LCMT2  
WNT10B  
MNX1  
TTC25  
TCEAL1  
TRIM55  
MSH5-SAPCD1  
CYP4F25P  
CACNA1C  
GNG4  
LINC01358  
TMEM70  
ID4  
AC090241.2

---

---

AP002847.1  
MYLK-AS1  
AC107398.3  
NDUFC1  
TRY2P  
TMX4  
RN7SKP214  
AC132872.2  
KCNT2  
ANKRD19P  
AC144568.1  
FAM19A4  
TREML1  
MYT1L  
RNASEH2B  
GLYCK  
AKAP6  
AC005342.1  
MTERF4  
AL358216.1  
PPFIA3  
USP41  
PSEN2  
NDUFA3P4  
AC022898.2  
ALG9  
AC010976.2  
AC112693.1  
AC137723.1  
PRDX2  
FER1L5  
ERG  
AC027281.1  
RTL4  
SLC7A8  
VAT1L  
ALLC  
WASH7P  
UBA52  
FOXRED2  
KIF17  
AD000671.2  
AC003973.3  
LYVE1

---

---

KHK  
SUPT4H1  
SLCO4C1  
FAXC  
AC120498.1  
AC015871.3  
AC100803.1  
SRGAP3  
AC104971.1  
NDST2  
AC015982.1  
WDR24  
AC027307.3  
AC091891.1  
AL031055.1  
GPHA2  
C19orf18  
CAMTA1-IT1  
TPO  
GPR119  
C18orf65  
NDUFB1  
WDR13  
AC024257.2  
RBM6  
AC055811.2  
AC010240.3  
AC005306.1  
AC079210.1  
LINC02532  
SPATA1  
MAP7D2  
IQCN  
H2AFVP1  
MAP2K5  
AC025048.4  
C3orf22  
AC119751.3  
ERC2  
FAM217A  
GSTA2  
GOLGA2P5  
SPACA3  
C10orf53

---



---

CLEC2L  
AC005523.1  
LINC00526  
AL133342.1  
GDF7  
GPR17  
C19orf24  
IFT74-AS1  
FAHD2A  
RPL15  
EIF3G  
AL031658.1  
RAB30-AS1  
FAM43B  
AC136604.3  
AC010547.1  
ADAMTS13  
AC026333.4  
HSPA4L  
AC100814.1  
AMBP  
AC055717.3  
C17orf75  
FFAR2  
AL590677.1  
AC147067.2  
AL109918.1  
AC098591.1  
AC011284.1  
USP27X-AS1  
SAMD3  
ISYNA1  
SLC17A4  
AC079467.1  
TMEM202-AS1  
HID1-AS1  
BTG2  
AL391244.1  
SIK3  
AC005486.1  
LINC01335  
GOLGA8S  
AC005856.1  
RNA5SP111

---

---

RPL21P16  
AC091181.1  
AL136972.1  
AF127936.2  
AL672291.1  
AC104232.1  
LINC02217  
AC063926.2  
FBXW12  
BCHE  
FXR2  
CFAP97D1  
AC008915.2  
AC123912.3  
PHF7  
LSM10  
AL133419.1  
AC012358.2  
AL353803.3  
LINC02251  
CYB5A  
KCNIP1  
LRCOL1  
TCTN1  
FSD1  
GABRB1  
LINC02256  
BCL6B  
SENP3  
CSGALNACT1  
AL049775.1  
MIR659  
SEMA6B  
NBEA  
CELF6  
C14orf178  
AL590068.1  
CCDC158  
FAM27E3  
AC004485.1  
MRPL38  
ANGPTL3  
AL359710.1  
AC006445.1

---

---

AC131159.2  
AC107982.3  
AC012184.3  
PPP1R14A  
GPAT2P2  
ZNF266  
DPT  
Z92544.1  
TRIM63  
ASTN2  
PARM1  
LINC01624  
AC016065.1  
LMO1  
NDUFAF4  
AC011297.1  
CACNA1I  
NEIL1  
SIVA1  
AC069544.1  
AP000997.3  
AL592114.1  
RPL7AP66  
AL590426.2  
AC005736.1  
RPS23  
IRX1  
CLEC4G  
AC008743.1  
INKA2-AS1  
TNKS2-AS1  
AC131097.2  
KCTD19  
ROCR  
TP53TG3D  
OLIG1  
AC145207.9  
AKAP7  
CR769776.2  
LIPJ  
CHL1-AS2  
AC124312.4  
MSX2P1  
ZBED8

---

---

DCDC1  
NKAPP1  
10-Mar  
PDILT  
GPR75-ASB3  
AC113403.1  
AC016257.1  
AC131235.4  
CCDC181  
LAMC3  
AC124312.3  
ZNF815P  
AC117382.2  
HMGA1P4  
PARVG  
CCDC127  
NDUFV2-AS1  
SDCBP2-AS1  
NOL12  
AC090152.1  
TMA7  
HAR1A  
ZAP70  
KANK1P1  
AC110285.5  
AL392089.1  
AC092944.2  
LINC01191  
LYRM4  
SFXN4  
FKBP8  
WNT9B  
STXBP1  
AP005131.4  
AC117500.1  
AC022296.3  
AC012618.3  
EDARADD  
AC083843.3  
MORF4L2-AS1  
AL109945.1  
AP000842.2  
YES1P1  
SUGP1

---

---

HELQ  
AC135048.3  
TTYH2  
AP000926.1  
LHFPL1  
AC138356.1  
AL049597.1  
RNU6-1272P  
RNU6-776P  
ABHD10  
BRD3OS  
RNU6-703P  
MATN4  
LINC02139  
LINC02273  
NDST1-AS1  
BX537318.1  
SLITRK1  
GPR27  
AC012358.3  
RBFA  
KCNJ4  
RPS26P21  
ZFP82  
AL354707.2  
AC021188.1  
ABCA3  
AP005717.1  
CHRDL2  
RPL10P3  
EMILIN3  
ABCA10  
UBL7  
AC005197.1  
AL137802.2  
SIM1  
AL356020.1  
AC087741.1  
AC097515.1  
NOTCH4  
AL132822.1  
IGLCOR22-1  
AC025165.5  
CHRM5

---

---

AC068533.3  
MT-TY  
AC025211.1  
CHCHD2P4  
MIR578  
RETREG3  
ABHD1  
RNU6-1189P  
ADAD2  
AL096870.2  
NICN1  
HMBOX1  
ZBED5-AS1  
AC008747.1  
CUTALP  
AL023581.2  
AC005363.2  
ARMCX1  
AC091965.1  
MAGED2  
AC004656.1  
ZNF135  
NRN1  
LINC01607  
LIMD2  
AC027117.2  
CNTFR  
AL133467.1  
AC006116.1  
CERKL  
ZNF569  
AC244090.2  
GPR42  
EBI3  
MOAP1  
SLC25A35  
AL135786.2  
RPSAP10  
ABHD15  
LINC00641  
AL358472.1  
TMEM74B  
USF2  
AC114728.1

---

---

LRRN2  
SMAD9-IT1  
AC023055.1  
SAFB  
LINC01754  
TNFAIP8L2  
AC011444.2  
TEKT4  
GPM6A  
ZBTB49  
MTND2P24  
AC105402.1  
TRBV7-4  
GUCA1C  
ELOCP28  
AC239798.1  
GLYCTK-AS1  
NPAS4  
ERP27  
AC092118.2  
KRT24  
NPPC  
FAM78A  
SOCS2P2  
AC005899.6  
AL121768.1  
GNPTG  
RNU6-605P  
BORCS7  
LINC01783  
AC109809.1  
AC009779.2  
AC053503.1  
AP003419.3  
AC008074.2  
ZNF77  
AL354877.1  
ACOXL-AS1  
PCCB  
AL162311.1  
AC034228.1  
FAM186B  
AC010624.4  
CSMD3

---

---

SUOX  
MIR663AHG  
NRF1  
LINC00305  
GTPBP6  
AC012313.3  
AC013643.3  
AC011468.5  
UFSP1  
ZCCHC12  
SCAND2P  
SOCS7  
CTD-2297D10.2  
MAGEE2  
SLC26A4  
PPM1F  
SZT2-AS1  
CCND2  
PNMA6A  
SCGB1C2  
AC087741.2  
GAB3  
OR5K2  
ADHFE1  
AC110079.2  
ISL1  
RNU6-833P  
ITM2A  
ENTPD3  
AL354696.2  
GMPR  
DLG5-AS1  
LINC00235  
ABCB1  
RAP1GAP2  
NPTX2  
ANXA6  
HCG20  
AC015819.2  
AC011899.1  
PRIMA1  
AP002765.1  
RBFADN  
JAKMIP3

---



---

HAP1  
HNRNPA1P16  
FRMPD1  
AC010504.1  
DM1-AS  
TIMM44  
AP006545.1  
EEF1AKMT1  
C17orf80  
ZIK1  
AL138831.1  
AC018797.2  
BVES-AS1  
KCNC2  
SNCA-AS1  
CACNA1C-AS1  
IL33  
HRAT92  
RN7SL121P  
ELL2  
AL157911.1  
EPA5-AS1  
AC129492.4  
AC093909.4  
AC009955.4  
KLHDC8A  
AC074183.2  
RASGRF1  
AL357060.1  
AL355990.2  
DYM  
CSRNP3  
MAP2  
ATP2B2  
GPC6A  
RPS3AP44  
ADAMTSL3  
ATP5PO  
ZNF541  
POMGNT2  
ZNF730  
CNTN2  
SLCO1C1  
WDFY2

---

---

AC007671.1  
SLC18A3  
AL034397.3  
OR5B2  
SYPL2  
AC007493.2  
AL353795.2  
CABP1  
SPATA4  
MRAP2  
RPL12P25  
AL449403.2  
AC112503.2  
FBLN7  
LINC01785  
FBXO16  
LINC00574  
SRGAP3-AS4  
AC004754.1  
CIRBP-AS1  
NUP88  
CHKB  
AC087392.2  
SEC14L6  
STARD7-AS1  
LINC00639  
RPL17P22  
AC037487.1  
CPLX1  
CROCC  
RHOJ  
LINC01786  
AL022396.1  
PRR5  
AC090993.1  
MTNR1B  
CRYGEP  
FLT3LG  
ITFG2  
LEFTY1  
KCNQ2  
SHISA8  
ZNF536  
LINC01412

---

---

AC107464.1  
RPL7AP50  
WDR7  
RNU6-2  
Z99774.1  
TSEN54  
MCF2L2  
ZDHHC8P1  
AL136141.1  
LINC02015  
MYMX  
NAALAD2  
ING3  
DLK1  
P2RX6  
NUP210P3  
TTLL10-AS1  
HIST2H2AC  
LINC01863  
AC025811.1  
AC099509.1  
AC026469.1  
RNU6-111P  
RPL3P2  
AL356512.1  
AC007681.1  
ZFR2  
CUEDC2  
PET100  
FBXO44  
ZBED9  
DUS1L  
AP000446.1  
AC078880.3  
SPAG6  
AC015802.4  
LINC00652  
AL929410.2  
RNF7P1  
AL031056.1  
TMEM266  
AL359532.1  
AP001790.1  
ZNF786

---

---

AC109347.2  
TTC39A-AS1  
LINC01567  
ABAT  
SEC22B4P  
ZNF132  
AC106820.5  
BDNF-AS  
LINC01197  
NEK8  
RNU6-722P  
OBSL1  
POLN  
LINC00240  
AC079601.1  
LINC01337  
USP30  
AC009686.2  
SLC25A38  
OR2H1  
MMD2  
AC090517.2  
ESR1  
DAO  
CYB561D2  
FOXN3-AS1  
ZNF607  
AC105137.2  
TOB1-AS1  
KRBA2  
TAB1  
RN7SL403P  
AP001282.2  
ALG5  
AC005832.1  
GIMAP5  
CACNG5  
RPL35  
FAM189A2  
RPL31P12  
AL162713.1  
RPL7P58  
VPS16  
HADHAP1

---

---

HERPUD1  
PKD1P1  
AC245452.1  
DNAI1  
DCAKD  
RN7SL316P  
ZSWIM2  
AC007207.2  
AL032819.2  
AC113361.1  
AC132942.1  
AP000439.3  
CDK2AP2P2  
RNU6-1267P  
AC022392.1  
NEURL2  
AC093677.2  
RPL21P120  
GLYATL1P4  
ABCA8  
GIMAP6  
IGFBP2  
CTDNEP1  
OSR1  
AC073389.3  
AC012074.1  
RN7SL693P  
MT-ATP6  
AC008759.2  
AL355574.1  
AC005180.1  
DEXI  
AC006063.1  
NDN  
AC243830.1  
AC079779.2  
HSF2  
BTG1P1  
AQP12A  
DDX51  
AF064858.1  
Z99916.1  
SORBS3  
AC107890.1

---

---

AC092979.1  
NDUFA8  
MED31  
AC012508.1  
PWRN4  
AC103952.1  
PES1P2  
AL589765.6  
CREBL2  
MT-ND6  
MEIS1-AS2  
VPS53  
LINC02382  
OR2T8  
AC009119.2  
MYLK2  
AC132938.3  
AL160313.1  
LINC02082  
SFRP5  
ANKRD34C  
IGLV2-28  
AC087763.1  
AP002812.1  
MIR217HG  
AC027020.2  
AP2A2  
AL157884.3  
CKMT2-AS1  
AC007993.2  
IL21R-AS1  
AC093772.1  
MT-ND2  
AC027097.1  
AC007773.1  
LINC01085  
AC010615.2  
CRYBA4  
TSGA13  
HAR1B  
AC093311.1  
AC117498.2  
HCN4  
NDUFAF1

---

---

CPO  
UXT  
PPP2R2D  
GRAP  
RPL21P90  
RAB11B  
AC008050.1  
PCDHA2  
GLUD1P3  
AC004921.1  
GAPDHP74  
UBA6-AS1  
AL034369.1  
BCL2  
AC012146.3  
AC011899.3  
AC069528.1  
NDUFS8  
HSD17B10  
AL109741.1  
ANKRD23  
FRY-AS1  
NKX6-2  
AP003041.1  
SGCA  
ABHD14B  
SEL1L2  
N6AMT1  
AC010627.1  
GALNT17  
AC021148.1  
EIF3LP2  
MAP3K7CL  
ZNF684  
CIDEB  
ATP11AUN  
VDAC2P3  
CAPSL  
KISS1R  
FOXI2  
MAMDC4  
THAP3  
MKRN7P  
AL161621.1

---

---

ALOX12P1  
ZNF385D  
LINC00616  
AFM  
CNTN3  
PHKA2-AS1  
AC009108.3  
LINC00982  
ACTC1  
GLYATL1  
IGKV2-26  
CATSPER3  
HSD17B1P1  
RN7SL526P  
RPL3P7  
AC023762.1  
RPL3P12  
NFIA-AS2  
AC012414.5  
CASTOR2  
PTCRA  
AC139100.1  
IL18RAP  
NUDT16L1  
AC139100.2  
AL122023.1  
PIK3CD-AS1  
RHBDL3  
TMEM192  
AC109454.4  
C17orf58  
AC021231.3  
DGKE  
RF00066  
MMP24OS  
AC061961.1  
AC004069.1  
AC112219.1  
AGAP2  
AP004247.2  
AL355810.1  
CFAP161  
AC005410.2  
GDAP1

---



---

DPF3  
AC066612.2  
STK32B  
BRAFP1  
PCARE  
AC104596.1  
UGDH-AS1  
AL353135.1  
AC092155.2  
GRIK1-AS1  
AL356740.2  
ZNF382  
CRB1  
AC068313.1  
AC040162.1  
MIR342  
HEPACAM  
DGCR5  
TSC22D1-AS1  
AP003108.5  
ADH6  
AL158835.2  
Z97987.1  
SLC25A45  
ALG2  
C14orf132  
AC126177.5  
BOLA3-AS1  
WDR25  
AC008105.2  
AC005009.2  
ALKBH3  
AC010422.1  
CARMIL2  
AC025165.4  
SLC2A2  
VAV3  
AC092111.1  
SCGB1D5P  
AL356481.1  
VASH1  
GLRA3  
TPTEP1  
AL359962.2

---

---

AC105053.1  
ANKLE1  
CENPS  
AC012513.3  
DNAJC12  
CRTAC1  
AP003717.2  
LINGO1  
GNGT2  
RXYLT1  
AC120057.3  
ZNF324B  
AC104634.1  
SLC35G6  
ZNF517  
NPTXR  
AL354977.2  
AC114498.1  
LSINCT5  
LRRC29  
AC105383.1  
AC007610.2  
LINC02226  
ZFX-AS1  
TTC36  
COLEC11  
P2RX2  
NXF1  
RAB6B  
AL450226.1  
AL137779.1  
ENKD1  
ALDH3A2  
AL158835.1  
AL021396.1  
TRIM67  
NALCN-AS1  
GGA1  
SDR39U1  
ZNF599  
AC022098.3  
AC093151.3  
AC004805.1  
AC024563.1

---

---

AMZ2  
AL390816.2  
AC093157.1  
F2RL3  
AP000229.1  
FOXN4  
SDAD1P1  
RPL10P7  
TUBG1P  
AC010425.1  
AC078909.2  
LANCL2  
CTSLP2  
AC092171.4  
RPL3P1  
AC090246.1  
DRICH1  
AC012467.2  
AC111182.1  
GAGE10  
MATN2  
AL357054.4  
SYT15  
MMRN2  
TMEM232  
RN7SL386P  
ELOA-AS1  
AP001767.3  
EPO  
SNURF  
RFNG  
PROX2  
AC239800.2  
AL512303.1  
PPP1R16B  
SMAD9  
AC011462.4  
AC011899.2  
FGF14-AS1  
TRPC2  
NXPE3  
MZF1  
RARRES2P1  
SLIT3

---

---

AL353743.4  
POPDC2  
CDH5  
GGTLC1  
LILRA1  
DYNLT3P1  
LINGO2  
DHH  
LINC01933  
INPP5J  
AC253536.2  
OR10G3  
SPOUT1  
AL513548.1  
CLPSL2  
ZCCHC3  
SEC24B-AS1  
SLC35F4  
AC079140.2  
AOC2  
AL627171.1  
AL451074.2  
LINC00269  
TMEM240  
H1FNT  
UROD  
PLIN1  
PRUNE2  
MIPEPP3  
CRYAB  
AC005154.5  
SERHL  
KIAA0408  
AP002001.1  
AC005578.1  
ZNF471  
AC016642.1  
AC090921.1  
ZSCAN30  
ZBTB11-AS1  
AC093142.1  
NMUR1  
CRYBB2P1  
AL049839.2

---

---

DCDC2  
CTC1  
Z94057.1  
AC005046.1  
HBB  
SERF1B  
SPECC1P1  
CCDC65  
AC011498.1  
AL354811.1  
SH3BP5-AS1  
RASA4CP  
AC245047.4  
RSPH14  
GULOP  
DACH2  
AL354694.1  
SCGB1B2P  
BANF2  
AC009220.3  
FAM122A  
AC106028.5  
ENPP2  
SWI5  
HSCB  
AC024257.4  
CAB39L  
DEAF1  
AP001267.2  
AC010185.1  
AP005131.3  
CNMD  
AF130417.1  
BMPER  
AC096887.2  
GRIK3  
AC125611.4  
AL117344.1  
PMPCA  
AC141557.1  
AC084876.2  
EDNRB  
SPATA24  
ARRDC5

---

---

NRXN3  
AP001625.1  
WASH4P  
GLYATL1P1  
CLUH  
AC079148.1  
ZDHHC1  
IPCEF1  
HSPB8  
ATP6V1E2  
CHRN3  
TMEM249  
ADAM7  
AC093107.2  
AL353616.2  
TNXB  
NOXRED1  
CEACAM4  
RPL21P93  
ANO5  
SSC4D  
FAM215A  
HPCAL4  
AC123567.2  
AP001636.1  
AC007861.1  
AC092296.1  
NLGN4X  
AC090772.4  
AL356489.2  
UPB1  
BLOC1S5-TXNDC5  
Z97192.3  
DIS3L  
SPDYE4  
AC099681.3  
AC013244.1  
FAM162B  
EEF1B2P6  
RN7SL186P  
AC024337.2  
UBE2O  
AC087855.1  
AC016757.1

---

---

AL359399.1  
FIGNL2  
AC022146.2  
WASH2P  
NFATC1  
KRTAP3-2  
ARL15  
AL117190.1  
PITPNC1  
PSTPIP1  
NPEPL1  
U73166.1  
PCP2  
SLC10A1  
AC116563.1  
AC073934.1  
MYO15A  
AC245884.9  
AC108488.1  
ZNF253  
ASCL4  
AC018521.6  
AL133163.3  
AC091946.2  
AL078599.2  
ARHGAP9  
C10orf111  
AC004839.1  
KRTAP21-1  
AC133552.3  
AC012146.2  
LSM7  
RPL21P108  
ATP6V0CP3  
EEF1G  
AL121932.1  
WDR88  
AL133320.1  
GABBR1  
AC008592.1  
AC133963.2  
AC092849.1  
AL392023.1  
MIR208B

---

---

AL353743.2  
APOLD1  
AL133371.2  
WDR37  
PWRN1  
AC079741.1  
AC084125.4  
ADORA2A  
SEPT7P9  
RAB33A  
AL445493.3  
AC017015.2  
ZPBP  
CEP83-DT  
EIF3J-DT  
LINC01795  
LINC01471  
COMMD6  
ADORA1  
UGT2B4  
TBL1X  
LIAS  
C19orf38  
LINC01704  
AC067930.3  
AC004477.1  
WHRN  
RFPL2  
NGF-AS1  
CMTM5  
TMEM89  
AC021439.1  
PHOSPHO1  
GH1  
TCAF2  
SERPINI2  
RPL9P7  
NEXN-AS1  
TRGC2  
MYLPF  
C8orf48  
SEMA3F-AS1  
MIR6859-2  
AC008806.1

---



---

AC004836.1  
AC011481.3  
AL590556.1  
MIRLET7D  
ZKSCAN2-DT  
NT5C1A  
MAGI2  
RPSAP31  
HNF1A-AS1  
DXO  
AC016885.1  
MRPL41  
PDE9A  
RPL35AP26  
FDCSP  
AC087273.2  
ZNF737  
AP001178.3  
TRAPPC5  
CTSLP1  
C4orf50  
CAPN6  
TSPAN12  
FASTK  
AP002754.1  
HCG25  
TMEM129  
AL139805.1  
TTR  
SLC25A36P1  
AC107958.1  
NTRK3  
AL049830.1  
WASHC1  
AGER  
GAPT  
AL391497.1  
PROP1  
FIS1  
AC009034.1  
ZNF527  
AC007349.4  
GPR158-AS1  
AL079301.1

---

---

ADAMTS8  
CD22  
ZNF618  
AL357055.3  
AC015911.7  
ZNF420  
C3orf14  
AC051619.7  
ARMC2  
UQCRQ  
GLIPR1L1  
AC025423.3  
CENPS-CORT  
AC010326.2  
LINC00379  
HSPA12B  
TCERG1L  
AL162394.1  
AL451069.3  
CLN5  
MYOC  
GYPE  
C1orf146  
C4orf48  
AL162385.1  
PINX1  
AC021915.2  
RPL12P30  
NMRK1  
AC010336.5  
ZFH2  
RPS28P7  
AC040977.1  
UQCC2  
AP006248.2  
AC073957.1  
APLNR  
AC005482.1  
KLF14  
AC006001.3  
TRIM39  
AC091045.1  
AL512604.2  
NKIRAS1

---

---

COLQ  
GLP1R  
LTB4R  
AL008718.2  
AL121834.1  
MED12L  
ARL6IP4  
TSGA10IP  
AL603840.1  
RNU6-520P  
KLF2P3  
AC064807.1  
NUBP2  
AC016582.1  
AL353803.1  
PRODH2  
SPSB4  
AC243756.1  
AC080188.1  
PARD3-AS1  
CBX8  
AQP8  
AC053503.5  
SDR42E2  
MACROD2-AS1  
BACE1  
B3GNT8  
TUSC3  
AL365361.1  
KCNMA1-AS1  
ACMSD  
LINC01780  
NSMCE3  
AL590399.4  
AC093278.1  
AC018766.1  
AL121758.1  
LINC01482  
AC006064.1  
AC124016.1  
LRIT3  
AQP7P1  
AC133041.1  
AC006116.9

---

---

SIRT3  
CORO7  
TRPC7  
AP000436.1  
AC037441.1  
CEACAM19  
PNLIPRP2  
TRIM3  
AC120036.4  
AC129492.6  
LINC01237  
TRDN  
HYDIN  
DPEP2  
AC012313.10  
CHST7  
AL137009.1  
RNVU1-6  
AF106564.1  
NXF5  
AC011700.1  
AL357500.1  
AC138207.2  
FAM166A  
TACO1  
MS4A4E  
SMIM6  
NEFM  
GIPC3  
HS3ST4  
LINC00680  
TTC19  
AC109826.1  
PPP3CB  
LINC00211  
PKNOX2-AS1  
AC008892.1  
ZNF556  
TENM2  
HABP4  
JUND  
LINC02128  
B3GAT3  
KRT8P28

---

---

AP001922.5  
CCL19  
MYL6B  
LINC02325  
AC010307.3  
MSX1  
FAAP100  
AC068790.8  
LIFR  
AC005165.1  
AC126768.2  
TRIM73  
AL136038.3  
AC011816.2  
ASGR1  
AL353678.1  
STAB2  
AC019197.1  
MRPL27  
ACVRL1  
AL357078.1  
AC133919.2  
SIGLEC11  
BRICD5  
EEF1A1P34  
CYP4F62P  
FGF14-IT1  
AC069185.1  
ARF4-AS1  
AC104938.1  
OMG  
AC011481.1  
MIR4290HG  
TMEM199  
RHOXF1P1  
AP1B1  
PIK3R2  
TOX  
ABCC9  
NCAPH2  
CEBPE  
PRKACA  
AC010894.5  
GPER1

---

---

C6orf58  
ARG1  
ELP3  
FBXL21  
CSN1S1  
MYH7  
AC018648.1  
AC007790.1  
DOHH  
AC145423.3  
AC010336.2  
AC004908.3  
AL117192.1  
LINC01105  
Z84480.1  
RTN4RL2  
MT-TG  
REG3G  
RNF150  
PDE6B  
RN7SL310P  
P2RX5  
LMF1-AS1  
TNFSF12  
OR8T1P  
LIMS2  
HGD  
ZNF287  
MPND  
ZSCAN26  
FABP5P14  
AC090515.1  
RFX1  
AC018467.1  
COX7C  
KRT10  
AC005498.1  
UQCR10  
AC078960.1  
ARHGAP44  
AP000880.1  
HNRNPA3P16  
WRB  
LINC02284

---

---

NACAD  
NDUFV1  
RCC1L  
AL353746.1  
EPB41L3  
SLC22A31  
RPS14  
AC135178.2  
PTENP1-AS  
ARHGEF7-IT1  
NFU1  
AC005899.1  
CCAR2  
C15orf40  
WFDC10A  
FAM173A  
PNLIPP1  
GTF2IRD1P1  
PRR36  
AC011472.4  
AL445307.1  
IGLVIV-59  
RNU5E-8P  
ZNF442  
AC090197.1  
PRORS1P  
LINC01277  
TTC9B  
PTPN5  
KANK1  
FAM193B  
NOL9  
AC026254.2  
TUBA8  
IL12A-AS1  
AC003084.1  
AC092813.1  
AC027601.2  
AL138787.1  
LINC00475  
PPAN  
PKD1  
MAS1LP1  
MIR4488

---

---

PVALEF  
TRIR  
XKR8  
AC063979.2  
ZZEF1  
AC091180.1  
GEMIN4  
RPL21P11  
TMC2  
AC245060.6  
AJAP1  
NDUFS6  
LINC01798  
AC005703.4  
PEAK3  
TCAP  
CELF2  
HSPA8P11  
S100A12  
RNU4-39P  
AL138752.2  
FAM78B  
SLC30A2  
AL358074.1  
LINC02084  
ID2-AS1  
IMPA1P1  
2-Mar  
AC067969.2  
MDGA1  
AC132192.2  
PDCD2  
GATB  
PGBD4P3  
AC078850.2  
UNC5D  
PODXL2  
GPR4  
IL13RA2  
DOK3  
AC020658.7  
ARRDC4  
CHRM4  
ITIH1

---



---

AP003086.1  
ERN1  
FUNDC2P1  
AC091167.5  
HIST1H3A  
CLDN34  
MC3R  
LINC02371  
LINC01480  
WDR18  
AC084706.1  
TEK  
PIRT  
TNFSF14  
LINC01522  
LINC01901  
CHODL  
CKB  
AL450263.2  
RPL39P38  
PTGER4P2  
RPSAP76  
AC026336.1  
HSP90AB6P  
AC011389.1  
FAM209A  
NYAP1  
LRFN3  
AC090971.3  
LPO  
RNU6-892P  
NDUFAF5  
DMD  
FREM2-AS1  
DISP3  
AC087683.1  
ADAM11  
NDUFA3  
ZNF208  
AHI1  
AC138466.3  
AL135785.1  
AL672277.1  
AC012442.2

---

---

MED28P8  
AP000721.2  
AC018845.1  
RNU2-70P  
ZNF663P  
LRRC24  
RUNDC3A-AS1  
VSTM2B  
LINC01004  
MPC2  
PLP1  
AC018738.1  
MRGPRF-AS1  
LINC00266-1  
AC131571.1  
AC004947.1  
SLC38A11  
GPR88  
RPL7AP34  
AC106872.2  
SCN7A  
NXPH3  
AC009245.1  
CPEB3  
UNC119B  
RPL37P6  
ARSE  
THTPA  
RPL24P8  
FADS3  
AL133343.1  
AL031733.2  
RAB40A  
ADCK2  
AC073508.1  
AC243960.1  
TERF2IP  
AL592182.1  
TMOD2  
FEZF2  
AP000221.1  
VIT  
FCMR  
SNORD115-21

---

---

ACVR2B-AS1  
CYP4F30P  
ZNF793  
CR381653.1  
CCDC149  
AC073896.5  
AC110792.3  
AC007656.1  
C17orf98  
AC022167.3  
AL138976.2  
AL031289.1  
DPYS  
TMEM268  
AC009078.2  
TRIM52  
AL365184.1  
CCDC130  
AC018755.4  
AL359541.1  
RPL13AP25  
AC020905.1  
RPL19  
AL158211.1  
MRPS33  
AC092335.1  
AP002812.3  
FAM216A  
NLRP2B  
ARHGEF9  
AC137723.2  
CLTRN  
FIG4  
CALN1  
AC025580.3  
TUSC2  
AC079907.2  
AC022726.1  
CD79A  
PHBP13  
OLFM3  
AC067945.3  
AL157902.1  
AC012557.1

---

---

AC073352.2  
AL078601.2  
ELAVL3  
AL359233.1  
GRIA4  
CAPS2  
RNU6-784P  
RIMBP3  
RPUSD2  
CRHR2  
FGF13  
AP003465.1  
CHID1  
AC011840.2  
FAM87A  
AP000944.1  
PIGL  
NKX2-3  
AC092171.5  
SLA2  
AP000350.5  
KRTAP8-2P  
ART4  
FZD3  
AC106872.4  
SGCZ  
GPR173  
AC025284.1  
CERS3-AS1  
AL691515.1  
SPATS1  
CCNQ  
OPRD1  
AC073896.4  
AC106820.2  
ZNF790-AS1  
Z98885.2  
EIF4E1B  
ARG2  
TSPYL4  
PRKCQ-AS1  
AC007881.1  
GALR1  
AC015849.1

---

---

PCDH12  
AC092803.2  
AC139495.3  
ZFAND4  
TMPRSS12  
KCTD6  
BRINP1  
KIAA1958  
AC005899.2  
CHD5  
AL512625.2  
SNORD113-3  
AC025263.1  
TTC34  
PRR3  
RPL5P10  
AL731569.1  
NDUFB6  
HDGFL3  
OAZ3  
AC096558.1  
LINC01251  
TTLL1  
PCDH8  
HTR4  
LINC00539  
AL356740.3  
SAP18P2  
SNRNP35  
MRPS7  
CCDC183-AS1  
AC132008.1  
AF213884.3  
AL024498.1  
MORC2-AS1  
TPT1  
AC009145.4  
IMMP2L  
AL589987.1  
ITGA8  
CCDC154  
AC002480.1  
C10orf142  
AC091564.5

---

---

DPP10  
LINC01185  
AC002546.1  
TSGA10  
STARD6  
AL031598.1  
CSDC2  
AC046143.2  
KC6  
SHISAL2A  
CCDC38  
AC018992.1  
TNFRSF4  
MPL  
RPL21P131  
AL032821.1  
AC021517.1  
CBARP  
LDOC1  
AC004696.2  
AC114808.2  
KHDRBS2-OT  
MYLKP1  
BNIP3P27  
SOX5  
ZNF626  
AP001554.1  
PTN  
ACTN3  
MZT2B  
AC002094.4  
LRFN2  
AL359076.1  
CCDC184  
KCND3-IT1  
STAG3  
ZNF672  
DKFZP434A062  
AC034231.1  
AP001189.6  
MS4A3  
RABL6  
AC024610.1  
IAPP

---

---

LINC01619  
AL365434.2  
FCER2  
CABCOCO1  
ZNF492  
AL445423.1  
NAPB  
AC092954.1  
WNT6  
ULK3  
ZNF346  
MAGED1  
AL356488.1  
AL139383.1  
AC104117.5  
AC090192.1  
SRY  
AC093673.2  
AC051619.8  
BNIP3P30  
AC005355.2  
AC105402.2  
ENG  
ARMC7  
CCDC96  
AC092384.3  
AC144530.1  
MTLN  
AARD  
IL13  
ST6GALNAC3  
AC119751.6  
LDHBP1  
AC092809.2  
ERAS  
GNAS-AS1  
SEPT4  
SLC17A7  
GPANK1  
TMEM160  
AC008770.2  
ATP5MC1  
ARHGEF33  
MIR3677

---

---

AL592429.1  
AL080243.2  
AC011603.1  
AL137779.2  
AL035250.2  
DHPS  
DNAJC6  
LINC02399  
FAM167A-AS1  
SLC4A1  
SLC22A7  
MFAP1P1  
ZNF589  
AC233728.2  
AC099850.1  
AC135178.3  
AC080013.3  
AC104561.2  
CD48  
LINC00892  
CCND2-AS1  
LAT2  
FLRT2  
MANSC4  
TBX1  
LRFN5  
AC034228.2  
CRYGD  
ZNRF4  
AC068025.1  
CDK20  
MAP1B  
ARHGAP4  
AL591885.1  
AC008969.1  
AP005271.1  
AC008906.2  
AP002001.2  
AC008758.6  
ZNF436-AS1  
AL136301.1  
LAMTOR4  
PTCH2  
AC020594.1

---



---

NDRG2  
AC136475.5  
MTCO1P42  
TEX53  
TMEM132E  
MRPS2  
AF129075.2  
AC022001.3  
RNF175  
STAB1  
RRAGA  
GLUD1P8  
AL139294.1  
FRZB  
SST  
CELP  
AC012645.3  
BTF3P14  
LRP5L  
AL353572.1  
AC079015.1  
AC022447.2  
MAP4K1  
TMEM52  
AC002451.2  
AL133245.1  
LINC00552  
C10orf71  
AC009495.2  
SMIM11A  
AC138230.1  
TMEM251  
AC037487.3  
AL162411.1  
ATP5F1AP3  
RPL7AP49  
C9orf40  
AC104758.1  
GRPEL2-AS1  
RNFT1-DT  
AL392023.2  
AC013275.1  
HMGNI1P5  
STUM

---

---

TMEM225B  
KRT33A  
AC007390.1  
AL079343.1  
KCNA4  
AC087477.5  
C8B  
XAB2  
SYBU  
ENO3  
AL445070.1  
EDN3  
LIPC  
CLVS1  
AC011383.1  
AC127459.2  
MUC15  
FAM205C  
TCTE3  
LINC01681  
AC068987.3  
AC020934.1  
AF067845.1  
DISP1  
AL732314.6  
AC098614.4  
AL445433.1  
ADRA2B  
AC091948.1  
SYNE1-AS1  
AC092378.1  
WEE2  
AC129908.1  
AL357054.2  
ALMS1P1  
ARHGAP19-SLIT1  
AL162586.1  
AC087045.2  
AL591479.1  
SLC9A9  
PNLIPRP1  
INMT  
AL118508.2  
AL035530.2

---

---

LEAP2  
STPG2  
AL590096.1  
UCP2  
AC097359.3  
AC004982.1  
COPS8P3  
AADACL4  
LINC02207  
VMAC  
POLL  
CYP4F29P  
AC018653.1  
KLHL13  
DNAJB5  
APH1B  
AC002480.2  
KIAA0087  
RNA5SP242  
TMEM100  
AL358473.1  
AC124312.2  
AC138649.2  
LINC02557  
AC037450.1  
PMP2  
LINC01975  
AC110998.1  
AC107214.1  
ANKRD34C-AS1  
AL451049.1  
AL008628.1  
LINC02054  
AL158070.1  
AQP3  
AP001360.1  
AP001505.1  
COX6A2  
AL450332.1  
HHATL  
AC244517.12  
AC087164.1  
CBY1  
SLC30A8

---

---

DSCAM-IT1  
AC105052.4  
MIR1250  
UBE2G2  
SMARCA2  
PTOV1  
AC245100.8  
RNGTTP1  
AL121906.2  
FOXD4  
CLEC4F  
AC025178.1  
HDC  
HCG9  
SOX12  
AC006329.2  
DNAAF1  
LRRD1  
LINC02340  
SCGB2B2  
OR13C2  
FAM20C  
TRPC7-AS1  
PECAM1  
RPL23AP88  
AC104793.1  
HCP5B  
CBR3-AS1  
HYI  
AGTR2  
LINC02102  
AL627230.7  
NDUFA6  
MIR541  
RFX2  
AL133406.3  
RNA5SP248  
ANO2  
AC046195.1  
LHCGR  
SOX3  
BRS3  
AC135050.3  
DNM1P47

---

---

LINC01899  
ACSM5P1  
EIF3KP1  
LINC00582  
MAFB  
AC079779.3  
AL031775.2  
CTRC  
AC093305.1  
TAF5  
AC136443.3  
FGF9  
AL390955.2  
CNTNAP5  
ADA2  
LINC00533  
SLC5A8  
AC021321.1  
TBL1Y  
AC090796.1  
LINC02158  
ARMCX3-AS1  
LINC00324  
TSSC4  
AC103809.1  
AL391095.3  
LPA  
AC023830.2  
SMPD2  
AC027287.1  
CLK4  
LINC02482  
PCDH19  
SNORA2B  
AC008758.2  
PTP4A1P2  
AC097478.2  
ZNF30  
AL096869.3  
AC092590.1  
AL008727.1  
INSRR  
RPSAP17  
SAMM50

---

---

SLC35F3  
AC008852.1  
AC024060.1  
METTL2B  
CCDC40  
AC105105.2  
RF01970  
HEXA  
AC091180.2  
SMIM9  
THOP1  
AC076966.1  
AC009299.2  
AC090844.2  
TPH1  
LINC02592  
TULP3P1  
TIAM1  
AC104653.1  
USP11  
AC063977.2  
Z93930.2  
RAD51-AS1  
AC010746.1  
RNU6-534P  
ZNF829  
SCUBE1  
AP1S2  
RUBCNL  
ZNF441  
LINC01475  
DLL1  
DCUN1D2  
AL121972.1  
AL162274.1  
NFATC2  
AC004522.2  
C1orf158  
USP44  
TMEM147-AS1  
LINC02249  
AC129492.1  
AC018730.2  
RPL7AP11

---

---

RPL23A  
AP005131.2  
AL137028.1  
CDH4  
HYPK  
BMPR1B-DT  
NOL4L-DT  
RF02219  
ZSWIM5  
DUSP16  
ZNHIT2  
BET1P1  
GTF3C5  
AC073072.1  
GUSBP11  
FO393401.1  
TRBV29-1  
AC078850.1  
MT3  
AC117386.1  
CCL2  
UBE2U  
DUSP8P5  
MAN2A2  
SHLD2P3  
BNC2-AS1  
ASCL1  
CDK5R1  
RARRES2P4  
AC007349.3  
AL355355.1  
SFMBT2  
NKAIN2  
AL138826.1  
CHCHD2P7  
AC012213.1  
AC021092.1  
AP001547.1  
AC105339.5  
SLC27A3  
TRIM60P14  
TPI1P2  
DIRAS2  
PPP1R12C

---

---

AC108472.1  
GPR6  
SLC24A5  
LINC00963  
AC010598.1  
ADCYAP1R1  
AL049749.1  
AC036111.1  
AC012442.1  
AC025431.1  
GOLGA8K  
VN2R19P  
NCF4  
LINC00992  
ZNF859P  
HCLS1  
ZNF563  
GPR179  
PADI4  
AP003080.1  
SUMO2P17  
COX11  
OR5AH1P  
AC013733.1  
DOC2B  
SSTR4  
DIRC3-AS1  
AC087463.4  
AL353801.3  
PROX1-AS1  
IGHV3-22  
BHLHA15  
DNER  
AP001107.8  
AC010300.1  
RPL36  
PRR29-AS1  
NAGPA  
LINC01666  
AC108475.1  
AC022306.3  
AIFM3  
KCNG2  
AL031316.1

---



---

AC091982.1  
USH2A  
AC005082.1  
MIR4324  
AP001257.1  
OR2B11  
RNA5SP47  
AC061975.6  
ZNF879  
SCARNA11  
AC069294.1  
RNU2-38P  
AC107208.1  
RNU6-1136P  
MAPRE2  
TUBB1  
GIMAP4  
AC009654.1  
BTD  
CEBPD  
AL136380.1  
AC022167.2  
IL1RL2  
AC073878.1  
GPBAR1  
INPP5D  
MMP21  
AC006065.1  
BX119904.2  
MEOX1  
PNRC1  
GRM7-AS3  
ZNF557  
ZNF689  
ANAPC15  
AC020917.4  
G6PC2  
SYT9  
AL513323.1  
AC010655.1  
AC104794.2  
AC080080.1  
SYNM  
CHL1

---

---

AC073626.1  
AC073842.1  
CDKL3  
PZP  
MIR4754  
RPS6KL1  
AC104083.1  
GLRA1  
AL390026.1  
JARID2-AS1  
AC106052.1  
AC010999.1  
AP000344.1  
LAGE3  
FAM237A  
AL353611.2  
HAMP  
AC079385.2  
AC027419.2  
AC000089.1  
RPL30P5  
CCDC39-AS1  
METTL21EP  
AC084809.2  
LENG1  
IMPG2  
PPP1R10  
RPL17P33  
DENND6B  
CACNA1C-IT2  
TMEM42  
TTLL6  
RNU6-1022P  
AC090527.3  
NECAB3  
AL512306.2  
CBX3P4  
CMKLR1  
SAPCD1-AS1  
AC246787.1  
AF123462.1  
AL139123.1  
CORO1A  
SPRYD4

---

---

WDR61  
MTRNR2L6  
AC105415.1  
RPL9P32  
AC084018.1  
RPL23AP32  
AC005324.5  
BRWD1-AS1  
KCNA3  
LINC00886  
NAPSB  
GCNA  
LINC00921  
TRARG1  
APOC2  
KBTBD3  
AC009878.1  
KLHDC8B  
CGRRF1  
FGF12-AS3  
CEL  
AC009065.8  
DPEP3  
PEX6  
FABP5P3  
AC004816.2  
TEX22  
MIR4489  
SH3RF3  
PDX1  
AL162386.2  
COL2A1  
NFIC  
AP005901.2  
NANOGP6  
C19orf44  
DNM1P51  
RFPL4AL1  
AL157791.2  
NGF  
SLC8A1-AS1  
AC046136.1  
A2MP1  
TATDN2

---

---

CCDC92  
TMC3  
RBM24  
AC016727.1  
AL355581.1  
RFPL1S  
MIR8083  
ZNF439  
SDHDP1  
ABCA11P  
RPL6P30  
TCL1A  
RGL1  
LINC02596  
NRG1-IT1  
AC010975.3  
AL354771.1  
AC004847.1  
CITED2  
AKAP3  
SUB1P1  
GATA2  
MYH6  
U62317.2  
AC012464.3  
RESP18  
AC090510.2  
PLA2G1B  
REELD1  
AC103591.3  
TMEM25  
RN7SL357P  
ARMC6  
TCTEX1D1  
LYRM1  
IGF1  
AC021491.1  
AP003355.2  
AL365205.3  
AL034376.1  
BRSK1  
AP004608.1  
PDZD9  
AC027097.2

---

---

RN7SL305P  
AC099681.2  
AMT  
BMPR1AP2  
DPY19L2P2  
LINC00486  
PCK1  
CHST2  
ZNF503  
RLN3  
CGNL1  
MPO  
CPN1  
LRIT2  
AJ003147.3  
AC063919.1  
LINC02405  
AP001099.1  
CACNA1S  
PEX11G  
RUFY3  
AC093879.1  
GLYAT  
AC069213.3  
OR2L13  
RPL12P35  
TRAF3IP3  
PDGFD  
RPL21P42  
TMEM256-PLSCR3  
RPL4  
PTGER3  
SLC36A4  
AC092135.3  
NLRP11  
YPEL2  
CPEB2-DT  
AC004052.1  
STRA6LP  
AC105402.3  
SPEF2  
ABHD12  
LINC01550  
AP002371.1

---

---

AC007292.2  
AC087239.1  
GABRG1  
CYBC1  
AC010834.2  
NOL8P1  
TEX14  
PRKRIP1  
AC009955.1  
DENND1A  
AC024587.2  
AL451069.2  
PRAMEF12  
RPS4X  
MYO1F  
AC011551.1  
PRLHR  
ZNF658B  
ATP13A5  
PLEKHJ1  
TBX21  
RASGEF1C  
FAM86B3P  
AC112493.1  
AP001063.1  
AL359091.2  
PRKCB  
LINC01230  
MIS12  
SUCLG1  
NAT9  
SMARCE1P6  
TMEM259  
TNNI3K  
SYCN  
AL049780.2  
IL17B  
FAM99A  
TNFRSF17  
DNAH10OS  
CD6  
LINC00598  
ABCD2  
ANKRD44

---

---

AC090525.1  
KCNV2  
AC011451.2  
AL049780.3  
AC008946.1  
CCL23  
PWRN2  
GRIK4  
SOGA3  
SMAP2  
AC007485.1  
HMGB3P22  
TRMT2A  
LINC02033  
AC015813.2  
AL049840.4  
RN7SL138P  
AL033527.3  
SLC8A1  
CRYGS  
IGSF1  
KRTAP3-3  
SLC35G2  
DERL3  
AC245014.1  
UQCRHP1  
AL157904.1  
HCRT  
RNU6ATAC20P  
NDUFA5P6  
LINC00926  
RIC8B  
TPRN  
AC148476.1  
LINC02322  
PDE7B  
ITGAD  
C1QTNF9B  
P2RY14  
PIK3C3  
AC113368.1  
GPR83  
NME3  
HNRNPA1L2

---

---

PCED1B-AS1  
MTHFD2P1  
AC005552.1  
DEPDC5  
RB1-DT  
AC096677.1  
TPT1P4  
AC234783.1  
TFPI2  
ABCA9  
AC096920.1  
AC026495.1  
BTG1  
KRTAP16-1  
SIK2  
AC092941.2  
TDRD6  
AC015540.1  
BHLHE22  
AL359715.2  
AC007686.2  
MGC27382  
GIMAP3P  
NPIPA1  
VIP  
CXorf40A  
C1QL4  
HMGB1P44  
AC009806.1  
AL157392.2  
ATG16L2  
LRRC37BP1  
AP001999.1  
AP003469.3  
AL157702.2  
LRRC63  
AC139099.1  
AL049610.1  
RNU6-5P  
ATP8A1  
GPR18  
KANSL1-AS1  
SPAG8  
F10-AS1

---



---

AL160314.2  
AC104463.2  
AC013417.1  
AC004862.1  
AP001781.1  
AL078621.3  
AC080038.1  
AF064858.3  
AC121764.1  
RGS5  
STAG3L4  
GNG3  
LGALS12  
AC005837.3  
CDRT4  
LINC01950  
ESRG  
LBP  
RNU6-759P  
RNA5SP247  
ESRRAP2  
SPIN2B  
C1orf162  
ZNF30-AS1  
GZMK  
AC015689.1  
CTC-338M12.4  
ATP13A1  
AC022148.1  
AL513550.1  
AC069061.2  
AC012640.4  
NES  
IGHV5-78  
FAM129C  
AL031656.1  
RBBP8P1  
AC005920.4  
GYG2  
AARSD1  
MYOM2  
AC108738.1  
LINC00700  
SIT1

---

---

OIT3  
POLR2J  
LRRC70  
AC018450.1  
AC010280.2  
HOMER2P1  
AC012368.1  
LINC01765  
NUP210L  
ASNSP1  
MTND6P4  
STXBP4  
AC023824.6  
LOXHD1  
CROCC2  
UBOX5-AS1  
SEC61A2  
RIMS4  
MIR8071-2  
AC005840.4  
LINC00685  
AL138724.1  
NELL2  
TRBV6-1  
AC091685.2  
AL359265.1  
SEPT7-AS1  
DSTNP1  
KCNAB3  
OR2W3  
AL390816.1  
APOF  
COPS4  
ZFP92  
AC023310.4  
PTOV1-AS2  
PDIA2  
AC068643.2  
PDZD2  
AL022311.1  
ADH1A  
TGFBR3L  
LINC02367  
AF064858.2

---

---

KTI12  
PAPPA2  
DMPK  
TRBV28  
ARL4AP3  
RAD17P2  
AP001347.1  
AC005487.1  
HTR1E  
AC010624.3  
ELAC2  
AP005242.3  
RPL34P31  
GALNT18  
AL139288.1  
MAGED4B  
AC137630.1  
ERICH3  
AP003108.1  
SETP17  
AC093424.1  
AC034102.8  
TPH2  
AC140725.1  
GPC3  
AC005920.1  
U47924.3  
LINC02499  
AC005089.1  
PABPN1L  
GOLGA8R  
AL355338.1  
EBF3  
PLCD4  
AC097468.3  
PEX16  
GABRA5  
AL354977.1  
AC116447.1  
C22orf15  
WAS  
RNU6-1056P  
NHLRC4  
TRBV21-1

---

---

AL590648.3  
AC145285.6  
AL138827.1  
AL392172.1  
POU2AF1  
OTOAP1  
AC092667.1  
AC055717.1  
BAALC-AS2  
AC129102.1  
AL451064.1  
AC087565.1  
RPL7AP60  
ATP5S  
LAMB4  
AC025594.2  
HEMGN  
TMEM17  
AC015813.1  
AL109936.2  
SNORA36A  
RNF157  
CUZD1  
AL023284.3  
AP001476.1  
AL606970.4  
NAA60  
AC136632.2  
VN1R35P  
AC048382.4  
AC067942.1  
HEATR9  
AC034238.1  
MUM1L1  
INTS6L-AS1  
GLT1D1  
C13orf42  
QSOX2  
LINC00618  
HSD17B1  
AC011921.1  
AMPD1  
AC138150.1  
SNORA12

---

---

GNAS  
MT1M  
OPRL1  
RPS3AP22  
FOXD4L6  
STAG3L5P-PVRIG2P-  
PILRB  
AC069307.1  
PTRHD1  
GNG8  
C20orf27  
SNORA20B  
Z97192.2  
ATP6V1B2  
VPREB3  
AP003774.4  
AC007731.1  
CALB1  
OR8G5  
PTGES2  
PLD3  
BCL2L10  
ABCC6  
AC067751.1  
IGIP  
AL121578.2  
COX7A2P1  
AC079193.1  
KDR  
AC013270.1  
STAT5B  
RNU6-415P  
XCR1  
AC019129.2  
LINC02461  
AC079949.2  
DCAF12L2  
HMGA1P5  
SASH3  
RF00410  
FO704657.1  
AC010904.2  
AC000123.2  
AL031429.2

---

---

RN7SL313P  
AC011365.2  
FIZ1  
KRTAP10-6  
AL121983.1  
ATXN8OS  
TMEM132B  
SLC25A51  
TCL6  
AC005041.1  
TEX11  
APBA3  
AC025283.2  
SOX2-OT  
AC126118.1  
GTF3C6  
NCR3  
AC008750.4  
GEMIN8  
RPL35AP3  
DCLK1  
AC046168.1  
AC116036.1  
PARP6  
AL138916.1  
MEGF11  
ASB5  
ABCG4  
AP001189.4  
AP002840.2  
SPRYD3  
YIPF7  
AL589826.1  
ACAP3  
PLIN4  
CPA2  
AC015660.3  
BPIFB4  
AL353753.1  
PRDM12  
HAS1  
AC092073.1  
CSTP1  
AC006023.2

---

---

PPIL2  
AC110285.7  
GYG1  
UXT-AS1  
AL133338.1  
KCNIP2  
RF00478  
RAB6C  
C5orf64-AS1  
AC044860.3  
PGPEP1L  
RPS6P2  
EEF1A2  
AC011499.1  
AL929472.1  
AC036214.1  
DRG2  
AC087885.1  
HIST1H2BA  
CD5  
AC097478.3  
AC007387.1  
CELA1  
PSMB11  
AC008267.5  
LINC00861  
ARHGAP33  
ELFN1  
MIR6851  
ATOX1  
KRT40  
RPL23AP56  
AC000036.1  
MAP2K4  
AL138820.1  
AL365226.1  
RNU6-20P  
SATB1  
AC012485.2  
TRBV20OR9-2  
TIGD6  
AC006504.7  
SULT1A2  
GNL1

---

---

STBD1  
RPL5P9  
SSR4P1  
AC011389.2  
SLC16A9  
AC112250.1  
RPL18A  
AL022722.1  
MIR6757  
AC023510.2  
LINC01019  
REXO5  
ERVFRD-1  
TRPM3  
FP565260.6  
SKP1P1  
AC092354.2  
LINC01558  
AC026150.1  
AC119403.2  
RPS23P6  
AL356317.1  
IARS2P1  
AP003027.1  
AC017083.1  
PAIP2  
MIR6885  
AP000777.3  
TLR10  
AC097658.2  
TNK2-AS1  
STK32C  
RPS3AP47  
RNF122  
MYO18B  
OR13A1  
LINC01865  
AL513477.1  
PPY  
ZNF511  
PACRG-AS1  
CELA3B  
WWC2-AS1  
RPS26P15

---



---

AC113935.1  
LRRC77P  
FCGR1CP  
PSIP1  
AC106897.1  
AC026954.2  
LINC02419  
SMYD4  
ASB2  
FBXW5  
MTMR9LP  
ZIM2  
RCVRN  
AC006484.1  
ANKRD39  
AC006333.2  
STAM-AS1  
AC009166.1  
POU2F2  
FP475955.1  
DOCK10  
AC241585.2  
AC096644.1  
LINC02301  
ZDHHC14  
GACAT2  
RABEPK  
NLRC3  
BNC1  
AC244197.2  
AC007834.1  
AC073072.2  
UBTF  
AC016831.4  
AC244157.2  
AC103808.5  
P3H3  
LY9  
AL021368.2  
AC006116.4  
MTG1  
AC064836.2  
MYBBP1A  
AL021395.1

---

---

EFL1P1  
AC007610.1  
AC141273.2  
AC073263.1  
AL590764.1  
MCAT  
RNF138P1  
AL162724.2  
AC016526.3  
AC025253.1  
AC009501.1  
MGAT1  
ADAMTS10  
SEPT3  
AC140481.2  
RPL34P34  
AL160394.1  
RNASEK  
ZNF154  
FBXO40  
AC087762.2  
AC006372.4  
AP002387.1  
AC107081.3  
FAM124B  
AC004980.1  
CBX2  
CEP131  
LNCARSR  
AL117336.2  
AC000124.1  
MUC19  
SULT1A1  
AC015911.2  
AC011815.2  
TRBV14  
RPRM  
HOXD-AS2  
AC022730.4  
MIR1268B  
ZNF812P  
PMF1-BGLAP  
EPHA5  
A1CF

---

---

PFN1P11  
INPP5E  
AC009812.4  
BX072579.2  
IMP3  
GABPB1-AS1  
SGK3  
DNAJC27  
AC009102.1  
NSMCE4A  
LTF  
TBC1D17  
RFPL4AP6  
AC133435.1  
FLG  
DYNLRB2  
AC090360.1  
TCEA1P1  
SCAMP4  
AC091153.4  
PARP4P3  
ARMS2  
CADM2  
GJA5  
AC133065.3  
HOXD8  
LRRC7  
ITGA2B  
FGD3  
DBIL5P2  
AC000403.1  
SSNA1  
AL137798.1  
LGALS2  
PTGFR  
RBM5  
CHIA  
PLD5  
AC020983.1  
EGFL8  
AC074389.2  
MRPL12  
LINC02417  
CDH23

---

---

SFI1  
MROH2B  
AL606760.2  
STX18-AS1  
AL136090.1  
AC125807.1  
AC011498.6  
AC022148.2  
AC008267.1  
PMCHL2  
MIR4801  
MAPT-IT1  
FP325330.3  
SLC17A2  
GYPB  
AC025034.1  
BOD1  
OR10AH1P  
AL353747.3  
ENOX1-AS2  
RNU6-452P  
CYSLTR1  
RN7SL169P  
AL109910.2  
AC090531.1  
PTPRM  
ISCA1P6  
AC016405.3  
RGMA  
AC097478.1  
SPATA18  
AC018892.3  
AC087636.1  
KCND1  
AP000894.2  
RPS26P6  
AC091982.2  
ZNF37A  
PABPC1L2B  
SYNDIG1L  
SCGB3A1  
DPYSL4  
SMCO3  
ZNF891

---

---

TBX2  
AC026362.1  
AC002400.1  
RAD1P2  
OR7E94P  
FES  
SLC25A47  
RN7SL413P  
PAPOLB  
TRBV19  
AC013549.1  
AATK  
AL590682.1  
AC110995.1  
THEMIS3P  
IGSF23  
AL391244.2  
RPL7P56  
INAFM1  
MXRA7  
NKG7  
LINC00710  
GAS5-AS1  
LINC01060  
TMEM235  
HMGB1P35  
AC073476.3  
OR2L6P  
ZNF547  
TMEM130  
AL139231.1  
OR9N1P  
SGCE  
KRTAP10-13P  
ENPP3  
BTNL9  
ZNF516  
MTATP6P27  
TMEM212-AS1  
AC127455.1  
TRAM2-AS1  
NRAP  
AC104984.1  
RPL13A

---

---

GFRA4  
FXVD4  
WDR87  
AC026951.1  
SERPINA1  
AC008972.2  
HACL1  
AL137246.2  
AC005833.2  
ADRA1D  
CCDC177  
RPL3P3  
AL391095.1  
AP000302.1  
TRG-AS1  
KIF9  
ZNF708  
NDST4  
CARM1P1  
SERAC1  
TECRP1  
CYS1  
TP53TG1  
NARF  
CC2D2B  
AC246785.2  
AC090948.3  
ACADS  
SRRM2-AS1  
AC113382.1  
MIR129-2  
AC010641.1  
MAP1LC3C  
GGTLC2  
F2  
MAP3K14  
AC079760.1  
ZNF37CP  
AC013264.1  
DMTN  
MIR3667  
ANAPC11  
AC080100.1  
AC074250.1

---

---

AC245884.8  
MTND4LP30  
CETN4P  
SECISBP2  
MIR300  
AC063977.6  
ZNF784  
SNORD3B-2  
CD40LG  
AC069222.1  
ASGR2  
AC015813.7  
SPATA20  
RNU6-984P  
NFKBIL1  
IGHV1OR15-6  
RPL32P34  
AC010285.2  
AC011298.1  
EIF4HP2  
DOK2  
LINC02104  
FMR1NB  
LINC00327  
AC079061.1  
GRHPR  
LINC01849  
AC090515.2  
TGFBR3  
AC069234.4  
ZNF14  
SEMA4D  
MCCD1  
STARD9  
HMGN5  
NEGR1  
SERPINA11  
GALNT8  
L3MBTL2  
B9D2  
HHEX  
LINC01095  
AC008592.4  
SNHG26

---

---

NUTM2D  
KCNH1  
FGFBP2  
ATP5MFP1  
AC009690.2  
SLC10A6  
AL359711.2  
DDN  
AL357518.1  
ATG4D  
B4GALT7  
KLRB1  
AL355102.3  
NPY  
ALDH8A1  
TM2D3  
DOLK  
EMC6  
KLF1  
HBM  
AL353600.1  
GPAM  
MTCO3P39  
AC005261.2  
KLHL14  
AC017100.1  
GP1BA  
HMGB3P10  
BAIAP3  
AC010271.2  
ZNF470  
NTN3  
DNAH12  
LINC00599  
AC010329.1  
LINC01659  
MIB2  
RPL9P18  
AC079949.1  
GPR26  
RPL21P119  
AC000111.1  
GAP43  
TMPRSS9

---



---

RPS17  
AC124283.5  
KRTAP5-5  
AC126564.1  
MIR106B  
BTLA  
AC145423.2  
CFAP61  
RPS3AP25  
NBEAP1  
RNU2-71P  
CTRB2  
SCN9A  
ADIPOQ  
FBLN5  
CD37  
FRMD4A  
CICP27  
LINC01410  
FAM21EP  
TUB-AS1  
MTND5P12  
LINC01266  
FUNDC2P3  
AC136475.1  
AC103831.1  
AP001922.6  
CLEC10A  
AP002986.1  
SLAIN1  
RN7SL732P  
TOLLIP  
ZNF561-AS1  
PREX1  
COX8A  
CLECL1  
ST8SIA5  
CELA2A  
AC245060.5  
AL807752.1  
BX470209.1  
ZKSCAN7  
AL078604.1  
AC144831.1

---

---

P2RY12  
RFPL4A  
FAM174A  
ATP9B  
AC020637.1  
TMC3-AS1  
AP001880.1  
RNU6-570P  
MRPL58  
CTD-2201I18.1  
AC006369.2  
RF00190  
AC026202.3  
HSD17B3  
LINC02568  
CCDC87  
LINC01100  
AL033519.1  
DNASE1L2  
AIPL1  
FAM53B-AS1  
RPL5P12  
RPL5P25  
MTCO1P9  
AC019294.2  
AC233702.6  
BACH2  
RAB6C-AS1  
GFRA1  
FBXO31  
TRBV6-5  
ATP5ME  
IKZF4  
RPRML  
MSANTD1  
AC107959.1  
AP001043.1  
RPL7P20  
FLI1  
STIM2  
AC023051.1  
OR13F1  
RNA5SP67  
MIR503HG

---

---

RNY1P11  
TGM3  
RPL26P37  
AL137000.1  
PGR  
IFIT6P  
MIR200CHG  
BX284656.2  
OXCT2  
LINC00621  
COMMD4  
PDE6H  
AC125603.1  
CCDC22  
SPOCK2  
LINC01034  
FLCN  
AC074348.1  
VAMP1  
HNRNPDLP4  
MED27  
KRTAP12-6P  
PRCP  
LEP  
ORAOV1P1  
AC124856.1  
AC120057.4  
AL356981.1  
TRGC1  
AC027682.1  
ICAM2  
LINC02391  
MSTN  
AP005019.1  
ZNF785  
ATF4P3  
DDN-AS1  
AC093423.2  
RNU6-324P  
KLHL29  
GALNT11  
AC068726.1  
PIANP  
AC092447.5

---

---

AC087379.2  
BEGAIN  
C1orf141  
DTX1  
AC096915.1  
VN1R91P  
AC013403.2  
SNORD114-1  
AC008897.3  
AL050305.1  
PSMC5  
MOB1B  
UBE3D  
AC104472.2  
NDUFAF2  
CLEC12B  
S1PR2  
MTND3P25  
CUL9  
NBPF20  
KRT8P30  
MAFA  
GDF10  
AC097505.1  
AC104009.1  
SCGB1D2  
AC008738.1  
AL021997.2  
MIR7-2  
BNIP3P16  
HSPB2  
LINC01320  
AC095060.1  
AC008267.3  
WWOX  
RNU1-67P  
AC073389.1  
CELA2B  
COG1  
SMG1P7  
ZNF209P  
ZNF788P  
LINC01886  
AL391822.1

---

---

AC011487.1  
TNFRSF8  
OLMALINC  
AC005357.2  
AC084855.1  
A2M  
TRUB2  
AC003985.2  
AC004969.1  
RSPO4  
AC087045.3  
AL391845.1  
AL022724.1  
AC010205.1  
AL158156.1  
RSPH10B  
MAATS1  
AC093752.1  
AC004067.1  
C10orf90  
AL031595.1  
AC073834.1  
ORM2  
LINC00667  
AC027237.2  
NMD3P2  
GSTA8P  
AC007375.2  
ARGFX  
AC024559.2  
AC018529.2  
GAA  
RPL11P5  
AC138649.1  
IGFBPL1  
PROCA1  
AL354824.2  
CA5A  
AL591167.1  
AC245884.4  
SCTR  
LINC01140  
CACNA1C-AS4  
CNN2P3

---

---

AC008507.1  
CCDC116  
AL135818.1  
SLC5A7  
AC022893.1  
NUDT11  
AP003032.1  
FAAP20  
CFAP99  
RN7SKP276  
ASMTL  
SSTR1  
ZBTB40  
AC025164.1  
STK11  
AC005740.4  
AL021997.3  
AC125618.1  
NCDN  
AC127502.1  
AL031058.1  
AC090617.6  
AC025040.1  
AC015921.1  
CYYR1-AS1  
LINC00348  
RF00537  
SNORD36C  
ZNF189  
AC026471.4  
AL136526.1  
AL500527.1  
SIRPAP1  
AC005014.3  
ARSEP1  
COG8  
TKTL1  
MS4A1  
GCGR  
AAMDC  
CFHR1  
LEFTY2  
AP001628.1  
FCRLA

---

---

AC098483.1  
RGL3  
KCNS2  
C8orf89  
MSS51  
UGT2B15  
AC233992.2  
GADD45GIP1  
AC080188.2  
WHAMMP2  
HP  
AL606760.3  
KLHL41  
FGD1  
AC016737.2  
AC090607.5  
STOML1  
AC114776.1  
AP006587.3  
LINC01440  
C8orf34-AS1  
LINC02440  
CYP27A1  
MIR8071-1  
MTCO1P22  
DPP10-AS1  
AL133492.1  
AL353621.1  
AL161756.1  
AC015813.3  
ANKRD20A8P  
AC002094.5  
AL390195.1  
AL355353.1  
ST8SIA1  
NDUFS3  
LINC01740  
ZNF74  
AC091198.1  
AC244502.1  
P2RY13  
AC010201.2  
CTRB1  
AL159169.3

---

---

AL137026.1  
MZB1  
SLC22A16  
AC084782.3  
PCYOX1L  
MYCBP2-AS1  
FP325330.2  
AC104137.1  
RPS16P5  
AC025259.3  
RPL5P17  
UPF3A  
GUSBP3  
AC006116.3  
ADCY2  
AL049651.2  
9-Mar  
AC012354.1  
ALPL  
TBC1D22A  
TSKS  
AC093330.1  
LINC00184  
AC010809.3  
AL031602.1  
URM1  
AL365209.1  
APTX  
AC055713.1  
TRBV6-4  
RSL24D1P8  
AL139246.5  
LINC02028  
C1orf194  
AC022167.4  
AC079340.2  
FAM8A1  
AC104971.3  
AC025521.1  
TEX41  
AC087855.2  
AL031864.2  
PAWRP1  
FSIP1

---



---

AC024933.1  
ZNF85  
RN7SL40P  
AL049775.3  
CROCCP2  
MIR4539  
LINC01735  
TRBV7-7  
AC123769.1  
RNU5B-2P  
AL135818.2  
RN7SKP160  
COMMD9  
UBE2F  
AC120036.2  
CRB2  
C12orf65  
CNNM3  
TMEM244  
LINC02240  
MICAL1  
SNORA84  
NEURL3  
AC006504.8  
SLC45A1  
KCNE5  
LRCH2  
MYH1  
CCDC183  
AC023790.2  
AC245052.1  
ACOXL  
RABAC1  
IGHV1-45  
AC233728.1  
DPPA3P3  
NPY1R  
AL049712.1  
RPL22P8  
PPIAP70  
OR10G4  
FCGR1B  
SCO1  
HOXD3

---

---

AC006441.4  
SLAMF1  
AP006621.3  
MTND6P22  
AL603839.4  
AC108156.1  
P2RX6P  
MTHFD2P6  
CLSTN2  
COL14A1  
AC090616.6  
AC117503.1  
CLDN3  
WDR81  
UBE2J2  
FOCAD  
AL137060.1  
COQ3  
LINCMD1  
AC109446.3  
LINC01497  
AC002545.1  
AL136537.2  
PRPH2  
AC012065.3  
LINC01118  
CD244  
MIR4477B  
AC015909.5  
AC068254.2  
POLR2E  
LINC01079  
AP006621.5  
AL162424.1  
KCNH7  
AADACL3  
AC002428.2  
MIR581  
AC091078.1  
RNF208  
AL137186.2  
IL2  
CES1  
AC109361.1

---

---

DLGAP1-AS3  
DPY19L2P5  
TRBV12-1  
AC099794.2  
AC022390.1  
TMEM38B  
AC109449.1  
AL353705.1  
TENT5A  
LINC01198  
LINC02214  
HEPACAM2  
CT55  
PABPC5  
HPSE2  
SPDYE18  
MTCO1P12  
FAM19A1  
MEGF8  
AC005410.1  
ZBTB8B  
OGFOD1P1  
SLC25A52  
RNU2-63P  
USP22  
AC007557.4  
SOWAHD  
RNU6-378P  
AL353194.1  
LST1  
SNRNP70  
CD19  
AC008267.7  
MIR1273A  
AC034114.2  
AC018665.1  
RERGL  
IRF2BPL  
AL031716.1  
SRPX  
AL136379.1  
LINC02235  
DISP2  
AL031595.2

---

---

TSHB  
GPX4  
ACOT12  
AC005280.1  
AC024022.1  
RIBC1  
MARCKSL1P2  
MT-ND4  
ZNF286A  
LINC02067  
GIGYF1  
GRIA1  
MEIOB  
LINC01904  
PRSS3P4  
KCNRG  
TRBV5-5  
ULK1  
PEBP1P2  
CTSLP4  
AC009107.2  
OSBP2  
C3orf86  
PPIAP55  
AL359706.1  
TPBGL  
AC068896.1  
BCAT2  
UBXN10-AS1  
GSTT2  
FLYWCH1  
LINC01857  
KCNA1  
BEST3  
ACER1  
SSUH2  
AL513128.1  
CDKN2C  
AC004801.2  
AC021491.4  
AL354872.2  
AL139184.1  
AC008496.2  
BLK

---

---

AL139125.1  
AC244197.3  
AC004771.1  
AC090607.1  
PGBD4  
TNFRSF13C  
FTH1P19  
AL109811.4  
AMH  
AL589986.1  
AC129507.4  
IQCC  
AC092326.2  
AC078785.1  
ITGAL  
AC090970.2  
SCARNA12  
AC016152.1  
AL121594.1  
RORC  
TMEM252  
IGLV5-37  
MIR151B  
CNTN4-AS2  
AL355796.1  
GRM7-AS1  
RN7SL205P  
AP002358.2  
AC122710.1  
AC008481.2  
PRH2  
GP2  
AL008635.1  
TAB2-AS1  
RPSAP57  
RBFOX3  
SNRPD2P1  
AC091060.1  
GABRA1  
THAP8  
PPIAP41  
SNORD115-45  
SLC25A20  
MRPS14

---

---

HIGD1C  
WEE2-AS1  
AC097374.1  
CDH8  
GLRXP1  
POLR1E  
NOC2LP1  
MEF2B  
C1DP4  
PCDH8P1  
RPLP1  
AL590399.5  
DUXAP7  
RBPMS2P1  
OR52N5  
AWAT2  
LINC01352  
AC099654.3  
AC048337.1  
MT1JP  
AC092447.7  
AC026336.2  
MYT1L-AS1  
AC006511.1  
AC005906.1  
PHKA2  
AL121917.2  
AC004918.1  
Z83839.2  
AC010245.2  
ANKRD55  
ASIP  
AL391069.4  
TMEM191A  
AC008764.2  
RNU6-529P  
SPNS3  
AC021016.2  
TRPC6  
AC092118.1  
LRRC61  
TAL2  
AC009022.1  
NOSIP

---

---

DLG3-AS1  
NOSTRIN  
KIAA0895L  
AP004607.4  
AL358937.1  
AC084346.1  
ARF5  
C5orf47  
AC087623.2  
ECI1  
AC024601.1  
AC026191.1  
GSTM5  
ARSA  
PPP3CC  
FGF18  
AC139792.1  
MIR4453HG  
AL133255.1  
C4orf51  
MIMT1  
LINC02471  
KLRK1  
ASIC1  
THRSP  
MRPL55  
AC005180.2  
AC245884.2  
AC068446.1  
IGLV3-22  
LINC01971  
MIR148A  
RNF227  
PKD1L3  
SLITRK5  
AL592546.1  
AL606469.1  
C10orf105  
RNU6-530P  
AC087783.2  
MIR6812  
LINC02287  
AC002540.1  
BCO2

---

---

CD7  
AP001972.3  
RPS23P8  
CLPS  
UCMA  
RCSD1  
AP005901.3  
ZNF24  
AC068506.1  
AC087741.3  
PLEKHB1  
AC004948.1  
SAGE1  
AL157392.3  
AP001324.3  
AC093390.1  
AC100793.2  
PPARGC1A  
RPL21P4  
LINC01970  
ZNF502  
AP3S2  
NCOA4P2  
HAO2  
DPF1  
IGLVI-56  
CPB1  
MT-CO1  
KCNC3  
TTC3P1  
MTND4LP5  
AC244453.2  
RNU6-287P  
JTB  
AC093775.1  
AC019257.1  
MIR5693  
AC006011.2  
TCEAL4  
AC099524.1  
AP000866.5  
MAGI2-AS1  
RPL23  
LINC02306

---



---

PABPC1L2A  
WNT2B  
AC104024.1  
AC104561.3  
IGKV2OR22-4  
AC099343.2  
Z97633.1  
KRTAP7-1  
NEFH  
RBM10  
ZNF876P  
AL023653.1  
AC074351.1  
FBXO41  
CCR7  
MORC1  
AP003072.5  
FAM169A  
FHL5  
FAM187B  
MIR6806  
TRBV12-2  
IGLV9-49  
PDE3A  
AP001007.3  
IKZF1  
ZNF350-AS1  
PAK6  
EEF1A1P33  
CRYGFP  
LRRC37A7P  
TDRKH-AS1  
AC015818.6  
AC005208.1  
AC023490.1  
AL590099.1  
AC132938.2  
CASC17  
AC024610.2  
AL359924.1  
AP001596.2  
AC087516.2  
REG3A  
KRT8P15

---

---

AL161908.1  
AL662860.1  
ZNF620  
AC239860.1  
RNA5SP456  
AC002553.2  
AC025035.1  
AC104794.1  
AL391005.1  
PNPLA6  
C4B  
KLRC2  
CCKAR  
ABCB4  
CACFD1  
NDUFA1  
AC239367.2  
AC012506.2  
TMEM273  
Z84468.1  
OGN  
AC025518.1  
LINC01616  
CPA1  
LINC02317  
GOLGA8DP  
ARHGAP27P2  
CNTD1  
SNORA80D  
AC012433.1  
AC107294.3  
WFIKKN2  
MEF2C-AS1  
ATP5PBP5  
KRTAP21-2  
LINC01954  
AC015936.2  
ZCWPW1  
LINC02333  
AC107027.3  
AC110602.1  
AC119751.1  
RPSAP34  
KCNIP3

---

---

NSUN5P2  
PTPN7  
MEIS1  
KIR3DL1  
AL449106.1  
PTH1R  
ATP5MC2  
AC005303.1  
GCH1  
ADAMTS7P1  
AD000671.3  
ACTG1P10  
AP002008.2  
UROC1  
AC084879.1  
AC013644.1  
AL513320.1  
RAB36  
GUCY1B1  
AL132639.2  
RPL3L  
NTRK1  
MTCO1P24  
CER1  
RRS1-AS1  
AP001464.1  
JAKMIP2-AS1  
AC078852.2  
FILIP1  
ZSCAN5A  
AC117395.1  
OR10G6  
AC093849.1  
RNU6-987P  
LINC01336  
AL021155.1  
LONP1  
MIR4636  
POMGNT1  
AL157400.2  
AC011754.1  
GFAP  
AC110716.2  
MUSK

---

---

CNKS3  
PRDM5  
BNIP3P9  
AC093010.3  
AL157396.1  
LGI1  
TNMD  
IPPK1  
CEP126  
AC243585.1  
AC019171.1  
AGFG2  
AC107220.1  
AC011495.1  
SPEF1  
AC007557.1  
RPL13AP7  
PQLC2  
AL121990.1  
AL512329.2  
OSTCP5  
AL117372.1  
AMMECR1LP1  
RIMBP3B  
AC097103.2  
HSPD1P10  
UBXN7-AS1  
AC007375.1  
NMD3P1  
LINC00648  
TCAF2P1  
AC007406.3  
AC104090.1  
CCDC196  
AL133352.1  
COA5  
PITPNM2  
RNA5SP78  
EDA2R  
AL592043.2  
SERPINA3  
AL161629.1  
AL137849.1  
CACNG1

---

---

ELP1  
AP000550.2  
ANKRD2  
ASB9  
MIR4538  
MTIF3  
RPL17P46  
RHOBTB2  
PAGE4  
CREM  
LINC00871  
AC241377.2  
EIF4BP3  
REG1A  
LRSAM1  
AC005225.3  
AL359821.1  
PKN1  
LINC02196  
AL590233.1  
EEF1A1P25  
RPL37A  
ZNF268  
AC007731.3  
AC117440.1  
AL391069.2  
SMCP  
VPS33A  
ZNF641  
RF02126  
AL160313.2  
RN7SL181P  
RPSAP1  
CINP  
NCBP2L  
C14orf93  
GRID1  
BTBD2  
PLEKHO1  
LMF1  
LINC02250  
OR10Y1P  
PIK3R3  
AC006435.2

---

---

RPS20P5  
AC137630.2  
AC092068.2  
WDR31  
ADAMTSL1  
AC034102.3  
CDKL2  
MCOLN2  
AL627309.6  
LCA5L  
AC006487.1  
AC103719.1  
AC005225.1  
AC138057.1  
RPS5P3  
BTF3P8  
HRH3  
NAALADL1  
AC087273.1  
CROCCP3  
AC010680.1  
FAM118A  
EPB41L4B  
AL136528.1  
AC015813.4  
MIR411  
DHRS2  
IFT43  
AL450311.2  
RPL17P3  
MYOZ2  
B3GALT6  
NOS1  
AC113349.2  
SHANK1  
DBX1  
AC074131.1  
IGKV2-30  
PGLYRP2  
HAVCR1P1  
DNM3-IT1  
AC005252.3  
AC073133.2  
AC126544.1

---

---

MIR587  
AL359853.3  
PAN2  
AC105749.1  
LINC02259  
CHCHD6  
CYB561A3  
AC108451.1  
BEST1  
AL132765.2  
LINC00528  
ZP1  
CDH20  
RPL21P3  
RPL35P1  
AC011504.1  
LINC01151  
CSNK1A1L  
GPC6-AS1  
AC002094.3  
C17orf82  
LINC02096  
CBX3P2  
RNU1-94P  
CNDP1  
AC010619.2  
AC008073.2  
LINC01278  
LINC01806  
BHLHB9  
HSPA12A  
TMEM156  
RPGR  
NECAB1  
AC064807.3  
GS1-24F4.2  
AL359644.1  
DNPH1  
AC027601.1  
MAP2K2  
AL354760.1  
Z97205.2  
REV3L  
AF129075.1

---

---

AC016044.1  
AC091153.2  
DSCR8  
REEP1  
ELANE  
LINC01787  
C1QTNF9-AS1  
FGF10-AS1  
AC007823.1  
AL118508.4  
ADGRE1  
CHCHD5  
RPL23P2  
MAST4  
AL590240.2  
AL118508.1  
AC092920.1  
FAM30A  
TBCD  
LINC01491  
C1orf229  
AP000866.1  
VSTM2A  
AC138331.1  
CNP  
AC108751.5  
CD180  
AC006019.2  
AC012409.3  
AP000911.1  
AC024270.2  
AL353622.1  
DDX11L2  
LY86  
GALNT13  
AC005332.7  
AC006511.2  
TEF  
AC022211.4  
RNU6-117P  
LINC01871  
AP001046.1  
AL121694.1  
MUSTN1

---



---

PDE3B  
AC011773.4  
AC016027.1  
PSG8  
DNAH6  
ZBTB32  
MTND5P11  
ACCS  
LINC00824  
AC254562.2  
SERPIND1  
RIT2  
HPX  
AL591848.3  
MIR6864  
AP4S1  
AC254562.1  
Z73965.1  
LINC02414  
SPATC1L  
CD1C  
AL512625.3  
ZBTB3  
AC106892.1  
AC007998.3  
AC027117.1  
DNM1  
IGLV4-3  
SLC7A10  
PNLIP  
AC005244.2  
DLL3  
AMY1B  
SLC26A7  
PRR4  
PGS1  
LINC02549  
AC103858.1  
ASIC2  
BBIP1  
BMP5  
CELA3A  
AC026471.5  
AL355472.2

---

---

AC010900.2  
PRMT2  
GALR3  
LINC00555  
LINC02200  
POMT2  
AL109659.3  
NUDT10  
AC108047.1  
AC126474.2  
AC007402.1  
TTC24  
AC069503.1  
AP000346.4  
C11orf52  
ZRANB2-AS1  
AL139082.1  
TRPM5  
IGHD4-11  
POLR2I  
AC061975.1  
AC090651.1  
SIGLEC16  
PTX3  
AL512378.1  
SULT4A1  
TRBV11-3  
EIF3F  
CCL3  
CLEC18A  
AC024341.1  
C3orf67-AS1  
AC006270.1  
RNU6-118P  
AC025884.1  
EFCAB6-AS1  
AL133153.2  
MSH4  
TUBB4BP7  
AL391219.1  
ARHGEF40  
RPL4P1  
AC100823.1  
ST3GAL6

---

---

APOE  
CCDC42  
RPL24  
LINC01869  
PRKAR1B  
TIGD5  
ZNF444  
LINC01797  
AL589993.1  
AC021818.1  
RPS3AP2  
ZNF680P1  
BHMT2  
NME8  
AC017002.5  
AC091544.5  
OR52N4  
MTO1  
AC090136.1  
AL139156.2  
MROH5  
IGHD5-24  
STK32A  
ANTXRLP1  
AC073257.2  
AC055855.1  
CHRM3-AS2  
MYOT  
CLEC17A  
AC022634.2  
THPO  
HPR  
AC010422.3  
AL133372.3  
RPS8  
ECEL1  
RF00001  
NPM1P47  
AC008556.1  
FCRL2  
BX255923.2  
AL137071.1  
YPEL1  
IGHVII-60-1

---

---

ABCA2  
TESPA1  
AC104458.1  
CDAN1  
AL022324.3  
AC114808.1  
AGAP6  
ATP4A  
CD3D  
TEX43  
DEFB132  
RPL7AP30  
AL161909.1  
AP001189.5  
TSHZ1  
GPR182  
ANO3  
AC096887.1  
ZNF383  
AC005838.2  
RPL29P2  
LRRC72  
RPS2P52  
PM20D2  
IGLC4  
CR382285.1  
AC004865.2  
SLC26A10  
GPR101  
AP002768.1  
RNU6-1149P  
RASL12  
TSPYL1  
RPL7P45  
DBF4B  
AC116351.1  
RNA5SP301  
KDM4E  
AL583839.1  
DPEP1  
LRRC9  
LINC01962  
RHOH  
AC092135.1

---

---

AL445228.2  
MED22  
TYSND1  
DDC  
ACOT13  
MIR146B  
GABARAPL1  
AC135731.1  
LINC00174  
LINC01924  
EID1  
RN7SL583P  
LINC01532  
AC008105.1  
AC013437.1  
PAR6G-AS1  
LRP1B  
PPP1R32  
LINC01176  
AC026780.1  
MECP2  
AL158211.3  
AC009133.3  
FAM90A1  
IFNA20P  
MTDHP4  
CD27  
AC005300.1  
BX255925.1  
RPS27AP3  
LINC02339  
LINC01678  
ZNF454  
AC108474.1  
ETFBKMT  
AC138393.2  
AC090957.1  
SNORA47  
AL121718.1  
GLDC  
AC099542.2  
LINC01122  
AC008708.1  
AL354718.3

---

---

ELL2P1  
SDAD1P4  
LILRA5  
AC024075.3  
HES6  
AC021739.2  
IGLV1-50  
MT-TD  
PLSCR2  
AL158211.4  
AL731563.3  
AC002090.1  
IRX6  
DUX4L50  
HNRNPA1P34  
CRH  
AC107294.2  
AL355864.2  
ZNF512  
AC138696.2  
ADGRL4  
UNC45B  
LTA  
AL122008.4  
MIR7158  
FCRL3  
AL355974.2  
AC023886.1  
AL356490.1  
AL512631.1  
AC010422.6  
LINC00332  
C2orf27B  
MIR491  
LIM2  
ADAM20P2  
DAB1  
MRPL43  
POLR3KP2  
RPS24P16  
ABHD17AP5  
AC105271.1  
MIR635  
SNX18P14

---

---

AC108748.1  
PRTN3  
MAGEC3  
AL109659.2  
AC112484.3  
ACTG1P24  
AL161457.1  
RXRB  
AC003982.1  
CALR3  
MORF4L1P4  
OXT  
AC068389.2  
TSPAN32  
EGF  
CDH12  
AC012507.2  
KLHL1  
AC079922.1  
ATF4  
AL162393.1  
SNORD109B  
AP000936.1  
AC092431.1  
AC079906.1  
TRAF1  
PHF1  
MIR1179  
MKI67P1  
GATD3B  
MINDY4  
ITIH4-AS1  
HDGFL2  
AC006946.3  
GNL2P1  
AC108471.2  
AC235565.1  
TMEM187  
RNU6-178P  
RPS17P5  
AL136295.4  
AC012486.1  
LINC01658  
AC097487.1

---

---

AP003171.1  
AC005996.1  
AP001120.1  
BPIFB2  
NPFFR2  
PPOX  
PLAC9P1  
MORN5  
UBE2E2-AS1  
AC011131.1  
AC244021.1  
ACSM3  
AC053503.2  
MIR216A  
AL159169.2  
RPL5P4  
FOXP4-AS1  
IGSF21  
AC103564.1  
EEF1A1P31  
TMC8  
RNA5SP515  
IGLV3-4  
BX119904.3  
AC138647.1  
AC012435.1  
HAPLN2  
AC005344.1  
RBM17P3  
AL512310.1  
LINC01489  
AC010547.4  
AC107294.1  
TRBV27  
RNU6-1089P  
AL096803.2  
SMIM26  
AC004801.5  
TAS2R8  
ZNF32-AS1  
ATP5MG  
AC005674.1  
AL132838.1  
AL158209.1

---



---

AC092471.1  
SNORD116-2  
GOLGA80  
HSPA8P13  
Z82188.1  
AC027130.1  
SDHAF4  
C16orf78  
ENDOV  
TRAJ5  
TRGV4  
AC005094.1  
GATA1  
PLA2G2D  
AC091962.1  
AC007969.1  
IGKV2-18  
AOAH  
MTATP6P3  
FAM90A2P  
VNN3  
HIST1H2AA  
MIR4452  
LINC01744  
SLC25A34-AS1  
AC010463.3  
AC106872.5  
ANKRD13B  
RING1  
AL078621.2  
TNPO1P1  
AL445465.1  
AK1  
CCNQP3  
ZSCAN5DP  
RFPL1  
ERVH-1  
PTPRZ1  
FRMPD4  
SNORD114-28  
RGCC  
AL139260.1  
LINC02153  
PTGDR

---

---

C11orf21  
DUSP8  
IGKV2D-28  
RPL7P6  
REG1CP  
AIF1L  
TMEM116  
ONECUT1  
RN7SL672P  
SMCO4P1  
IGFBP7-AS1  
AC009517.1  
RNA5SP442  
FBXO4  
ZBTB9  
AC010654.1  
DGCR10  
AC012213.2  
NDRG4  
LINC02046  
DCAF8  
AC136475.9  
AC018809.1  
IGKV1D-22  
TMEM115  
AC008764.8  
RPL5P30  
AL139021.1  
AP006545.2  
HEXA-AS1  
RNU6ATAC35P  
SRRM4

---

This document certifies that the manuscript

Expression and Prognosis Analyses of Insulin-like Growth Factor 2 mRNA Binding Protein Family in Human Pancreatic Cancer

prepared by the authors

Xiao-Han Cui, Shu-Yi Hu, Chun-Fu Zhu, Xi-Hu Qin

was edited for proper English language, grammar, punctuation, spelling, and overall style by one or more of the highly qualified native English speaking editors at SNAS.

This certificate was issued on **October 6, 2020** and may be verified on the [SNAS website](#) using the verification code **2AEF-7E50-EF8A-ECFD-DACB**.

Neither the research content nor the authors' intentions were altered in any way during the editing process. Documents receiving this certification should be English-ready for publication; however, the author has the ability to accept or reject our suggestions and changes. To verify the final SNAS edited version, please visit our verification page at [secure.authorservices.springernature.com/certificate/verify](https://secure.authorservices.springernature.com/certificate/verify).

If you have any questions or concerns about this edited document, please contact SNAS at [support@as.springernature.com](mailto:support@as.springernature.com).
